# Supplementary material for: Whole Genome Analysis and Prognostic Model Construction Based on Alternative Splicing Events in Endometrial Cancer
Source: Biomed Res Int. 2019 Jul 2;2019:2686875. doi: 10.1155/2019/2686875 (PMC6634061; doi:10.1155/2019/2686875)
Supplement: Supplementary 2 — Table S1. Splicing factors and corresponding gene symbols. [file 2686875.f2.xlsx]

## Sheet: Sheet1
Splicingfactor	gene_symbol
9G8	SRSF7
9G8	SLU7
CUGBP1	CELF1
DAZAP1	DAZAP1
ESRP1	ESRP1
ESRP2	ESRP2
ETR-3	CELF2
FMRP	FMR1
Fox-1	RBFOX1
Fox-2	RBFOX2
HNRNPA0	HNRNPA0
HNRNPA1	HNRNPA1
HNRNPA2/B1	HNRNPAB1
HNRNPA3	HNRNPA3
HNRNPC	HNRNPC
HNRNPD	HNRNPD
HNRNPDL	HNRNPDL
hnRNPE1	PCBP1
HNRNPE2	PCBP2
HNRNPF	HNRNPF
HNRNPG	RBMX
HNRNPH1	HNRNPH1
HNRNPH2	HNRNPH2
HNRNPH3	HNRNPH3
HNRNPI	PTBP1
HNRNPK	HNRNPK
HNRNPL	HNRNPL
HNRNPLL	HNRNPLL
HNRNPM	HNRNPM
HNRNPQ	SYNCRIP
HNRNPU	HNRNPU
HTra2	HTRA2
HuB	ELAVL2
HuC	ELAVL3
HuD	ELAVL4
HuR	ELAVL1
KSRP	KHSRP
MBNL1	MBNL1
Nova-2	NOVA2
Nova-1	NOVA1
nPTB	PTBP2
PSF	IGFBP7
QKI	QKI
RBM25	RBM25
RBM4	RBM4
RBM5	RBM5
Sam68	KHDRBS1
SAP155	SF3B1
SC35	SRSF2
SF1	SF1
SF2	SRSF1
SLM-1	KHDRBS2
SLM-2	KHDRBS3
SRm160	SRRM1
SRp20	SRSF3
SRp30c	SRSF9
SRp38	SRSF10
SRp40	SRSF5
SRp54	SRP54
SRp55	SRSF6
SRp75	SRSF4
TDP43	TARDBP
TIA-1	TIA1
TIAL1	TIAL1
YB-1	YBX1
ZRANB2	ZRANB2
TDP43	TDP43
PSF	SFPQ
ASF	PSMD4
ASF	ARSF
