# Supplementary material for: Whole Genome Analysis and Prognostic Model Construction Based on Alternative Splicing Events in Endometrial Cancer
Source: Biomed Res Int. 2019 Jul 2;2019:2686875. doi: 10.1155/2019/2686875 (PMC6634061; doi:10.1155/2019/2686875)
Supplement: Supplementary 3 — Table S2. 1166 prognostic-related alternative splicing events with unique TCGA SpliceSeq AS id in EC. [file 2686875.f3.xlsx]

## Sheet: Sheet1
Name	ID number	gene symbol	splice type	exons	from_exon	to_exon	novel_splice	pct_with_values	psi_range	std_psi	pvalue	HR	CI-low	CI-high
RPLP0-ES-24731	ID_24731	RPLP0	ES	5.3	4.2	6.2	0	0.9672	0.8139	0.0958	0.000100013	0.000112433	1.15e-06	0.0109736
ZNF586-AT-52338	ID_52338	ZNF586	AT	6	NA	NA	0	1	0.7393	0.1048	0.000101819	18.4198	4.23793	80.0599
STK32C-AP-13486	ID_13486	STK32C	AP	1	NA	NA	0	0.9897	0.8603	0.1426	0.000120813	0.0915488	0.0270576	0.309754
C4orf29-AT-70557	ID_70557	C4orf29	AT	14.2	NA	NA	0	1	0.533	0.0888	0.000143525	62.3895	7.40831	525.417
C4orf29-AT-70558	ID_70558	C4orf29	AT	15	NA	NA	0	1	0.533	0.0888	0.000143537	0.0160285	0.00190326	0.134986
ANAPC11-ES-44217	ID_44217	ANAPC11	ES	3.3:6	3.2	7.2	0	0.9983	0.7981	0.1041	0.000153433	51.6633	6.70132	398.295
CREB3L4-AP-7768	ID_7768	CREB3L4	AP	1.1	NA	NA	0	0.9466	0.9894	0.2944	0.000158431	3.97218	1.94186	8.12528
CREB3L4-AP-7769	ID_7769	CREB3L4	AP	2	NA	NA	0	0.9466	0.9894	0.2944	0.000158432	0.251751	0.123073	0.51497
ODF2L-AA-3672	ID_3672	ODF2L	AA	20.1	19	20.2	0	1	0.9132	0.1731	0.000172676	7.97707	2.69921	23.5749
PPP2R1B-AT-18674	ID_18674	PPP2R1B	AT	18	NA	NA	0	1	0.7754	0.1265	0.000176422	0.0169424	0.00201132	0.142715
PPP2R1B-AT-18672	ID_18672	PPP2R1B	AT	16	NA	NA	0	1	0.7754	0.1265	0.000176422	59.0235	7.00698	497.187
U2AF1L4-ES-49268	ID_49268	U2AF1L4	ES	0.00566088	7	9.2	0	0.9638	0.5339	0.0858	0.000176961	0.0224034	0.00307648	0.163146
GRB2-AP-43438	ID_43438	GRB2	AP	3.1	NA	NA	0	0.9069	0.7552	0.1362	0.000177587	12.9295	3.39188	49.2857
MAATS1-AT-66353	ID_66353	MAATS1	AT	18	NA	NA	0	0.9293	0.743	0.135	0.000196644	0.0809893	0.0215684	0.304115
MAATS1-AT-66354	ID_66354	MAATS1	AT	6.2	NA	NA	0	0.9293	0.743	0.135	0.000196692	12.3469	3.2881	46.3628
ARHGAP39-ES-85636	ID_85636	ARHGAP39	ES	7	6	8	0	0.9017	0.622	0.0591	0.000198321	0.00929359	0.000790689	0.109235
CBWD5-AT-86498	ID_86498	CBWD5	AT	17.2	NA	NA	0	1	0.5366	0.0998	0.00020262	37.4901	5.54256	253.584
RABEP1-ES-38673	ID_38673	RABEP1	ES	2	1	3	0	0.7603	0.513	0.04	0.000218482	0.000845775	1.99e-05	0.0360109
HSF1-AA-85557	ID_85557	HSF1	AA	14.1	13	14.2	0	0.9983	0.7953	0.0567	0.000238723	0.0255523	0.00361292	0.180718
FKBP11-AT-21495	ID_21495	FKBP11	AT	8	NA	NA	0	1	0.6631	0.1179	0.000251825	0.0598812	0.0132614	0.270391
SIRT5-ES-75396	ID_75396	SIRT5	ES	6	4	7	0	0.9414	0.6438	0.0525	0.000282673	0.0018278	6.08e-05	0.054958
FKBP11-AT-21496	ID_21496	FKBP11	AT	7.2	NA	NA	0	1	0.6631	0.1154	0.000285001	17.624	3.7413	83.0204
IFT122-ES-66738	ID_66738	IFT122	ES	0.213194	3	8.2	0	0.7948	0.6795	0.1275	0.000324926	0.0590568	0.0126269	0.276213
C6orf141-AT-76449	ID_76449	C6orf141	AT	5	NA	NA	0	0.8052	1	0.2443	0.000328265	5.90491	2.24075	15.5609
TPM4-AP-48124	ID_48124	TPM4	AP	1	NA	NA	0	0.9983	0.9214	0.1872	0.00033533	6.3706	2.31575	17.5254
TPM4-AP-48125	ID_48125	TPM4	AP	3	NA	NA	0	0.9983	0.9214	0.1872	0.00033533	0.156971	0.0570599	0.431826
LFNG-AP-78616	ID_78616	LFNG	AP	5	NA	NA	0	0.7948	0.5415	0.0514	0.000345507	0.00123678	3.16e-05	0.0483992
GRB2-AP-43439	ID_43439	GRB2	AP	1	NA	NA	0	0.9069	0.7699	0.1399	0.000350882	0.0946801	0.0259971	0.34482
SCRN2-AP-42115	ID_42115	SCRN2	AP	1	NA	NA	0	0.9448	0.809	0.1284	0.000352665	0.0731841	0.0174392	0.307119
SCRN2-AP-42116	ID_42116	SCRN2	AP	2.1	NA	NA	0	0.9448	0.809	0.1284	0.000352685	13.6641	3.25604	57.3419
ZC3H11A-AP-9456	ID_9456	ZC3H11A	AP	4	NA	NA	0	0.9793	0.8228	0.049	0.000353581	34.2192	4.92643	237.689
RNF144B-AP-75486	ID_75486	RNF144B	AP	1	NA	NA	0	0.7879	0.8373	0.0459	0.00040877	53.5768	5.89086	487.275
RNF144B-AP-75487	ID_75487	RNF144B	AP	2	NA	NA	0	0.7879	0.8373	0.0459	0.00040877	0.0186648	0.00205223	0.169754
NHP2L1-ES-62449	ID_62449	NHP2L1	ES	3.2	2	4	0	0.9983	0.5053	0.0808	0.000410939	64.9948	6.41439	658.569
TAB2-ES-78073	ID_78073	TAB2	ES	8	7	9	0	0.7569	1	0.0569	0.000455213	45.9991	5.40967	391.136
CYB561-AP-42925	ID_42925	CYB561	AP	1	NA	NA	0	0.8793	0.9654	0.1529	0.000468325	0.10708	0.0306257	0.374399
C16orf13-ES-32921	ID_32921	C16orf13	ES	0.0854167	1	5	0	0.9983	0.6727	0.1164	0.00049405	0.0798897	0.0192783	0.331066
BMP1-AA-82993	ID_82993	BMP1	AA	15.1	14	15.2	0	0.9483	0.6022	0.0653	0.000515366	45.0891	5.25425	386.93
C16orf13-ES-32924	ID_32924	C16orf13	ES	2	1	3	0	0.9983	0.6281	0.0997	0.000546109	0.0505266	0.00930008	0.274507
SIK3-AA-18875	ID_18875	SIK3	AA	22.1	21	22.2	0	0.9207	0.8307	0.1138	0.000556933	37.6039	4.79503	294.899
STXBP4-AT-42571	ID_42571	STXBP4	AT	19	NA	NA	0	0.9983	0.751	0.1076	0.00057015	0.0724148	0.0162641	0.322422
STXBP4-AT-42570	ID_42570	STXBP4	AT	12	NA	NA	0	0.9983	0.751	0.1076	0.00057015	13.8093	3.10153	61.4852
CPPED1-ES-34061	ID_34061	CPPED1	ES	3	2	4.1	0	0.9948	0.8538	0.0603	0.000572476	0.0118387	0.000948276	0.147799
CEP70-AT-67000	ID_67000	CEP70	AT	7.2	NA	NA	0	1	0.5398	0.0841	0.000578481	48.0793	5.2975	436.361
SIX5-RI-50517	ID_50517	SIX5	RI	2.2	2.1	2.3	0	0.9776	0.6539	0.0785	0.000640365	32.0357	4.37758	234.442
C11orf49-RI-15609	ID_15609	C11orf49	RI	14.2	14.1	14.3	0	0.9621	0.776	0.1557	0.000640841	11.2194	2.79985	44.9575
WDR45-ES-89084	ID_89084	WDR45	ES	0.00424884	5	7.2	0	0.7845	0.9363	0.194	0.000654535	9.77823	2.63479	36.289
LINC00908-AT-45828	ID_45828	LINC00908	AT	3	NA	NA	0	0.9793	0.6752	0.1241	0.000659216	0.0562625	0.0107409	0.294712
IPO7-ME-250015	ID_250015	IPO7	ME	2|3	1	4	0	0.7672	1	0.0631	0.00066858	28.7418	4.15213	198.957
SH3GLB2-ES-87809	ID_87809	SH3GLB2	ES	12	11	13	0	0.9983	0.5351	0.0298	0.000691923	114.21	7.39586	1763.68
SIAH1-AP-36338	ID_36338	SIAH1	AP	7	NA	NA	0	0.9966	0.6497	0.0632	0.000700134	96.2292	6.86242	1349.39
DMTN-ES-82930	ID_82930	DMTN	ES	6	5.2	7	0	0.8879	0.6697	0.1198	0.000748405	47.885	5.05078	453.985
MYL6-ES-22378	ID_22378	MYL6	ES	4.3	4.1	5	0	1	0.8702	0.2136	0.0007532	5.47108	2.03585	14.7028
C16orf13-ES-32923	ID_32923	C16orf13	ES	2	1	5	0	0.9724	0.8667	0.189	0.000774189	0.164182	0.0572614	0.47075
TFAP2A-AP-75290	ID_75290	TFAP2A	AP	1	NA	NA	0	0.8345	0.7163	0.1454	0.000775066	11.0356	2.72139	44.7511
ESR1-AP-78161	ID_78161	ESR1	AP	4	NA	NA	0	0.8379	0.7851	0.1176	0.000783232	19.2175	3.42442	107.846
TADA2A-AT-40520	ID_40520	TADA2A	AT	12.2	NA	NA	0	1	0.6869	0.1057	0.000788564	14.0304	3.00134	65.5876
TADA2A-AT-40518	ID_40518	TADA2A	AT	17.3	NA	NA	0	1	0.6869	0.1057	0.000788893	0.0712791	0.0152477	0.333212
CCDC107-RI-86260	ID_86260	CCDC107	RI	3.8	3.7	3.9	0	0.9983	0.6098	0.0802	0.000794771	106.224	6.95637	1622.05
ZNF586-AT-52336	ID_52336	ZNF586	AT	4	NA	NA	0	1	0.8348	0.1407	0.000817784	0.10828	0.0294536	0.398066
LINC00908-AT-45829	ID_45829	LINC00908	AT	4	NA	NA	0	0.9793	0.6752	0.136	0.000831236	13.801	2.96093	64.3265
NPIPA8-ES-266561	ID_266561	NPIPA8	ES	3	2	4	1	0.8086	0.695	0.0746	0.000831709	27.1656	3.91763	188.371
SERBP1-AA-3354	ID_3354	SERBP1	AA	5.1	4.2	5.2	0	1	0.5143	0.0674	0.000833481	121.778	7.28197	2036.54
ODF3B-ES-62862	ID_62862	ODF3B	ES	3.1:3.2	2.2	4.2	0	0.8017	0.7684	0.1465	0.000834284	0.108198	0.0293547	0.398801
ANAPC11-ES-44208	ID_44208	ANAPC11	ES	6	3.4	7.2	0	0.9759	1	0.1316	0.000913768	17.2349	3.20311	92.7349
SEPT9-AP-43726	ID_43726	SEPT9	AP	3.1	NA	NA	0	0.9638	0.7952	0.1561	0.000920381	0.0682021	0.0139329	0.333852
PPIL4-AP-78083	ID_78083	PPIL4	AP	11.1	NA	NA	0	0.8293	0.5112	0.0676	0.000945265	33.3119	4.16885	266.185
PPIL4-AP-78082	ID_78082	PPIL4	AP	1	NA	NA	0	0.8293	0.5112	0.0676	0.000945265	0.0300193	0.00375679	0.239875
GSTO2-AT-13050	ID_13050	GSTO2	AT	9	NA	NA	0	0.9948	0.63	0.0898	0.00103623	0.0549176	0.00969932	0.310944
GSTO2-AT-13051	ID_13051	GSTO2	AT	7	NA	NA	0	0.9948	0.63	0.0898	0.00103636	18.2087	3.21593	103.099
ITGB3BP-ES-3267	ID_3267	ITGB3BP	ES	2	1	3	0	0.7931	0.6692	0.0689	0.00104518	37.8308	4.30973	332.078
POMT1-ES-87950	ID_87950	POMT1	ES	0.0854167	1.1	4	0	0.7603	0.5733	0.1042	0.00106507	561.763	12.6741	24899.4
WFDC2-ES-59582	ID_59582	WFDC2	ES	0.0014375	1	4.3	0	0.8293	1	0.2046	0.00106682	0.182339	0.0657928	0.505339
GREB1-AT-52703	ID_52703	GREB1	AT	12	NA	NA	0	1	0.5173	0.0423	0.00107093	103.311	6.41733	1663.17
STXBP6-ES-27042	ID_27042	STXBP6	ES	3	1.1	6	0	0.8103	0.6243	0.077	0.00113049	38.6547	4.2829	348.873
SEPT9-AP-43715	ID_43715	SEPT9	AP	8	NA	NA	0	0.9638	1	0.1517	0.00116645	7.83482	2.26134	27.1452
TBC1D23-ES-65817	ID_65817	TBC1D23	ES	15	14	16	0	0.7672	1	0.2464	0.0011821	5.50925	1.96437	15.4512
PPHLN1-ES-21226	ID_21226	PPHLN1	ES	8	7	9	0	0.9448	1	0.0636	0.00118276	41.3374	4.35993	391.928
CARM1-ES-47600	ID_47600	CARM1	ES	4	3	5	0	0.9276	0.5289	0.0537	0.00121784	46.8305	4.55318	481.662
NSUN5-AA-79934	ID_79934	NSUN5	AA	9.3	9.1	9.4	0	0.9966	0.5842	0.0492	0.00122065	0.0221357	0.00219857	0.222867
CENPM-AP-62466	ID_62466	CENPM	AP	6	NA	NA	0	0.9638	0.9398	0.2411	0.00134832	0.104797	0.0263848	0.416243
C6orf141-AT-76447	ID_76447	C6orf141	AT	6	NA	NA	0	0.8052	1	0.2335	0.00134984	0.162808	0.0536554	0.494011
DYNC1I1-AT-80544	ID_80544	DYNC1I1	AT	19	NA	NA	0	0.9466	0.7077	0.0822	0.00139621	0.0478048	0.00740469	0.308629
SULT1A4-AP-94113	ID_94113	SULT1A4	AP	1	NA	NA	0	0.7931	0.8182	0.1119	0.00139664	0.0567327	0.0097602	0.329768
RNASEL-AT-9156	ID_9156	RNASEL	AT	8	NA	NA	0	0.9966	0.523	0.0507	0.00143237	0.0148481	0.00111594	0.19756
RNASEL-AT-9155	ID_9155	RNASEL	AT	6	NA	NA	0	0.9966	0.523	0.0507	0.00143451	67.3252	5.05929	895.912
IMPA2-AD-44661	ID_44661	IMPA2	AD	6.2	6.1	7	0	0.8948	0.6132	0.0472	0.00154748	60.7454	4.77827	772.247
SPINT1-AD-30056	ID_30056	SPINT1	AD	5.2	5.1	6	0	0.969	0.8436	0.1139	0.00163802	14.2153	2.72447	74.1698
DYRK1B-AA-49846	ID_49846	DYRK1B	AA	10.1:10.2	9	10.3	0	0.9552	1	0.1391	0.00166498	9.73544	2.35652	40.2198
NAPRT1-RI-85430	ID_85430	NAPRT1	RI	11.5:11.6:11.7	11.4	11.8	0	0.9845	0.643	0.0946	0.00167042	18.3711	2.99161	112.814
SH3BP2-AP-68592	ID_68592	SH3BP2	AP	1	NA	NA	0	0.769	0.7901	0.1905	0.00169781	6.24554	1.98954	19.6059
GPR56-AP-36577	ID_36577	GPR56	AP	2	NA	NA	0	0.9276	0.8838	0.1655	0.00170278	0.13143	0.0369986	0.466875
TMEM256-PLSCR3-ES-38937	ID_38937	TMEM256-PLSCR3	ES	8	7	9.1	0	0.9741	0.7104	0.1248	0.00170389	0.0890089	0.0196407	0.403375
TRO-AD-89255	ID_89255	TRO	AD	12.2:12.3	12.1	13	0	0.9828	0.8291	0.2073	0.00173443	0.231998	0.0929931	0.578786
RPS24-AA-12297	ID_12297	RPS24	AA	5.1	4	5.2	0	1	0.898	0.2375	0.00173838	0.24492	0.10154	0.590758
IGF2-AP-13896	ID_13896	IGF2	AP	6.1	NA	NA	0	0.8138	0.9798	0.2	0.00173975	0.179918	0.0614924	0.526415
APBB3-RI-73671	ID_73671	APBB3	RI	6.3:6.4:6.5	6.2	6.6	0	0.9603	0.6912	0.0608	0.00176686	0.0330284	0.00389495	0.280074
TPRKB-ES-53980	ID_53980	TPRKB	ES	3	2.2	4	0	1	0.8877	0.1043	0.00185783	13.5319	2.62322	69.8041
GLYR1-ES-33866	ID_33866	GLYR1	ES	4	3	5	0	0.7759	1	0.0767	0.00188007	16.995	2.84836	101.403
PARD3-AD-11215	ID_11215	PARD3	AD	16.2	16.1	18	0	0.8241	0.6871	0.1122	0.00188271	16.6727	2.82761	98.3089
UBXN11-ES-1254	ID_1254	UBXN11	ES	6	5	7	0	0.9431	1	0.1486	0.00190028	0.102238	0.0242399	0.431216
MLXIP-AT-24925	ID_24925	MLXIP	AT	9.5	NA	NA	0	1	0.7351	0.0945	0.00193874	15.4222	2.7341	86.9916
MLXIP-AT-24926	ID_24926	MLXIP	AT	17	NA	NA	0	1	0.7351	0.0945	0.0019395	0.0648468	0.0114961	0.365786
ESR1-AP-78163	ID_78163	ESR1	AP	5.1	NA	NA	0	0.8379	0.8604	0.1759	0.00195908	0.136938	0.0389004	0.482053
GSN-ES-87432	ID_87432	GSN	ES	12	10	16	0	0.9569	1	0.0573	0.00201812	12.3777	2.50633	61.1286
PRDX5-ES-16640	ID_16640	PRDX5	ES	3	1	4	1	0.9966	0.7079	0.1219	0.00204571	0.0692607	0.0126902	0.378011
C4orf33-AT-70597	ID_70597	C4orf33	AT	6.2	NA	NA	0	0.9983	0.6624	0.0839	0.00207653	19.6208	2.95015	130.494
C4orf33-AT-70596	ID_70596	C4orf33	AT	7	NA	NA	0	0.9983	0.6624	0.0839	0.00207666	0.0509668	0.00766322	0.338971
ANAPC11-ES-44216	ID_44216	ANAPC11	ES	3.3:3.4:6	3.2	7.2	0	0.9948	0.5822	0.1032	0.0021049	23.5254	3.14299	176.089
MEPCE-AP-80949	ID_80949	MEPCE	AP	2.1	NA	NA	0	0.9707	0.984	0.1267	0.00214309	0.098756	0.0225214	0.433044
MEPCE-AP-80950	ID_80950	MEPCE	AP	1	NA	NA	0	0.9707	0.984	0.1267	0.00214343	10.1256	2.30915	44.4007
EFCAB1-AT-83800	ID_83800	EFCAB1	AT	7	NA	NA	0	0.8397	0.7398	0.0899	0.00215723	20.5396	2.9783	141.65
EFCAB1-AT-83801	ID_83801	EFCAB1	AT	6.2	NA	NA	0	0.8397	0.7398	0.0899	0.00215729	0.0486864	0.00705963	0.335764
SCARB1-AP-25153	ID_25153	SCARB1	AP	1	NA	NA	0	0.8741	0.9379	0.0677	0.00215902	0.0402188	0.00516081	0.31343
C11orf63-AT-19191	ID_19191	C11orf63	AT	10	NA	NA	0	0.9207	1	0.1535	0.00216652	0.159256	0.0492146	0.515341
C11orf63-AT-19192	ID_19192	C11orf63	AT	4	NA	NA	0	0.9207	1	0.1535	0.00216652	6.27922	1.94046	20.3192
SRSF2-AD-43667	ID_43667	SRSF2	AD	1.2	1.1	2.1	0	0.9655	0.5172	0.072	0.00218159	0.0249494	0.00235401	0.26443
C21orf58-RI-60928	ID_60928	C21orf58	RI	9.2	9.1	9.3	0	0.9552	0.9547	0.2217	0.00218483	5.31639	1.82575	15.4808
PPP2R4-AP-87834	ID_87834	PPP2R4	AP	14.1	NA	NA	0	0.9759	0.5724	0.0797	0.0021954	31.6942	3.47018	289.474
PROM2-AA-54495	ID_54495	PROM2	AA	24.1	23	24.2	0	0.981	0.7157	0.0925	0.00221132	149.421	6.05067	3689.95
TFE3-AA-89056	ID_89056	TFE3	AA	3.1	2	3.2	0	0.8879	0.7356	0.1154	0.00222896	21.3674	3.00224	152.075
PDHA1-ES-88633	ID_88633	PDHA1	ES	7	6.1	8	0	0.9948	0.8017	0.0471	0.00229079	637438	118.593	3426225801
CDC14A-AT-3881	ID_3881	CDC14A	AT	12.2	NA	NA	0	0.9966	0.6057	0.0305	0.00232587	473.567	8.9825	24967
CTNNB1-AA-64251	ID_64251	CTNNB1	AA	18.3	18.1	18.4	0	1	1	0.1167	0.00232894	15.0536	2.62763	86.2412
AK7-AT-29201	ID_29201	AK7	AT	2.2	NA	NA	0	0.9517	1	0.2326	0.00233486	3.75811	1.60234	8.81423
AK7-AT-29200	ID_29200	AK7	AT	18	NA	NA	0	0.9517	1	0.2326	0.00233494	0.266092	0.113453	0.62409
CDC42SE1-ES-7556	ID_7556	CDC42SE1	ES	5	4	6	0	0.9603	1	0.1285	0.00234739	0.0450674	0.0061185	0.331956
FGD5-ES-63534	ID_63534	FGD5	ES	18	17	19	0	0.8121	0.9079	0.0656	0.00239668	0.062917	0.0105513	0.375171
TSPAN11-AT-20954	ID_20954	TSPAN11	AT	9	NA	NA	0	0.9931	0.8875	0.0841	0.00243459	0.0765124	0.0145209	0.403153
TSPAN11-AT-20953	ID_20953	TSPAN11	AT	3.2	NA	NA	0	0.9931	0.8875	0.0841	0.00243509	13.0693	2.48033	68.8643
FBXL19-AD-36205	ID_36205	FBXL19	AD	8.2	8.1	9	0	0.9138	0.8835	0.1397	0.0024364	9.75398	2.23648	42.5401
CDC14A-AT-3883	ID_3883	CDC14A	AT	18	NA	NA	0	0.9966	0.8074	0.0705	0.0024541	0.0698597	0.0124839	0.390933
SCARB1-AP-25152	ID_25152	SCARB1	AP	2	NA	NA	0	0.8741	0.793	0.046	0.00246005	97.2976	5.02729	1883.09
SULT1A3-AP-94132	ID_94132	SULT1A3	AP	4	NA	NA	0	0.9983	0.8887	0.1372	0.00247216	13.6616	2.51307	74.2673
ZDHHC11-AT-71450	ID_71450	ZDHHC11	AT	15	NA	NA	0	0.7897	0.8856	0.1612	0.00255793	8.53708	2.11921	34.391
NPIPA5-AD-34149	ID_34149	NPIPA5	AD	8.2:8.3	8.1	9	0	0.9948	0.9571	0.1504	0.00257581	7.03936	1.979	25.0392
TCTN1-AT-24461	ID_24461	TCTN1	AT	7.3	NA	NA	0	1	0.8501	0.1646	0.00257895	6.16023	1.88851	20.0944
TCTN1-AT-24458	ID_24458	TCTN1	AT	19	NA	NA	0	1	0.8501	0.1646	0.00257942	0.162336	0.0497665	0.529535
PRKCA-AT-43100	ID_43100	PRKCA	AT	19	NA	NA	0	0.9983	0.8967	0.1452	0.00262658	0.176598	0.0570682	0.546485
PRKCA-AT-43101	ID_43101	PRKCA	AT	10	NA	NA	0	0.9983	0.8967	0.1452	0.00262662	5.66256	1.82987	17.5229
SCRIB-ES-98107	ID_98107	SCRIB	ES	17	16	18	1	0.8828	0.9675	0.1922	0.00264954	0.129108	0.0339799	0.490547
PHF11-ES-25893	ID_25893	PHF11	ES	11	10	12	0	0.9603	0.8345	0.0738	0.00265434	15.5038	2.5944	92.6484
MLPH-ES-58118	ID_58118	MLPH	ES	7	6	8	0	0.9259	0.5865	0.0743	0.00266953	0.0321331	0.003409	0.302885
SLC25A29-RI-29253	ID_29253	SLC25A29	RI	3.6	3.5	3.7	0	1	0.9708	0.1635	0.00271307	6.84378	1.94674	24.0594
PPP2R4-ES-87847	ID_87847	PPP2R4	ES	5	4	6	0	0.9345	1	0.0844	0.00274724	0.00693027	0.000267649	0.179447
EIF4H-ES-80063	ID_80063	EIF4H	ES	5	4	6	0	0.969	0.5202	0.0737	0.0027854	28.3953	3.16801	254.511
AP1G2-ES-26770	ID_26770	AP1G2	ES	2	1.4	3	0	0.9759	0.5285	0.0657	0.00279103	0.0156875	0.00102961	0.23902
HOOK2-ES-47866	ID_47866	HOOK2	ES	18	17	19	0	0.8931	0.8465	0.0897	0.00284297	12.6478	2.38913	66.9563
DNAH9-AT-39293	ID_39293	DNAH9	AT	70	NA	NA	0	0.8155	1	0.2467	0.00284847	0.225898	0.085015	0.600248
DNAH9-AT-39292	ID_39292	DNAH9	AT	4.2	NA	NA	0	0.8155	1	0.2467	0.00284855	4.42676	1.66597	11.7626
HDAC11-ES-63490	ID_63490	HDAC11	ES	6.1:6.2:7:8	5	9	0	0.9362	0.6232	0.0695	0.00285012	0.0337501	0.00364279	0.312691
MRPL33-ES-53046	ID_53046	MRPL33	ES	3	2	4	0	1	0.7694	0.1162	0.00290949	16.4946	2.60568	104.415
CAST-ES-72858	ID_72858	CAST	ES	10	9	11.2	0	0.9483	0.5826	0.1035	0.0029352	0.0582843	0.00895635	0.379291
TFAP2A-AP-75289	ID_75289	TFAP2A	AP	4	NA	NA	0	0.8345	1	0.217	0.00293941	0.193686	0.0656557	0.571378
ZNF283-AT-50248	ID_50248	ZNF283	AT	10	NA	NA	0	0.9948	0.9987	0.3037	0.00296078	0.352154	0.176926	0.700929
MC1R-RI-38164	ID_38164	MC1R	RI	2.2	2.1	2.3	0	0.8052	0.8744	0.1299	0.00314201	0.102398	0.0225689	0.464591
C19orf54-RI-49966	ID_49966	C19orf54	RI	8.8	8.7	8.9	0	0.9966	0.7121	0.1092	0.003194	26.7314	3.00891	237.484
TNFAIP2-RI-29435	ID_29435	TNFAIP2	RI	12.2	12.1	12.3	0	0.9966	0.7976	0.122	0.00323941	15.9152	2.52187	100.439
HN1L-AP-33118	ID_33118	HN1L	AP	2	NA	NA	0	0.8759	0.855	0.0981	0.00327194	0.00015652	4.56e-07	0.0537831
HN1L-AP-33119	ID_33119	HN1L	AP	1.1	NA	NA	0	0.8759	0.855	0.0981	0.00327299	6384.72	18.5854	2.19337e+06
RNPS1-ES-33261	ID_33261	RNPS1	ES	3	1.1	4	0	0.9931	1	0.1299	0.00334089	10.2256	2.16428	48.313
MRPS12-AD-49738	ID_49738	MRPS12	AD	1.2	1.1	1.4	0	0.9845	0.6531	0.1146	0.00334205	11.0003	2.21728	54.5743
NT5C-AP-43357	ID_43357	NT5C	AP	2.1	NA	NA	0	0.9948	0.8836	0.1466	0.00335562	6.51089	1.86189	22.7681
NT5C-AP-43358	ID_43358	NT5C	AP	1	NA	NA	0	0.9948	0.8836	0.1466	0.00335563	0.153589	0.0439211	0.53709
NUPL2-ES-78962	ID_78962	NUPL2	ES	7	6	8	0	0.9017	1	0.0647	0.00347048	11.9343	2.26302	62.9368
BIRC5-ES-43864	ID_43864	BIRC5	ES	3	2.1	4	0	0.8293	0.6727	0.0796	0.00349176	37.6008	3.29737	428.77
SULT1A4-AP-94114	ID_94114	SULT1A4	AP	4	NA	NA	0	0.7931	0.6663	0.0819	0.00349272	335.197	6.7711	16593.6
ARHGEF11-AP-8336	ID_8336	ARHGEF11	AP	1	NA	NA	0	0.9621	0.5598	0.055	0.00349739	0.0419568	0.00499438	0.352471
ARHGEF11-AP-8337	ID_8337	ARHGEF11	AP	23	NA	NA	0	0.9621	0.5598	0.055	0.00349862	23.8318	2.8368	200.209
YDJC-ES-61232	ID_61232	YDJC	ES	4	3	5	0	0.969	0.6777	0.1027	0.00350972	0.0712974	0.0121063	0.419889
SERINC2-AP-1469	ID_1469	SERINC2	AP	3	NA	NA	0	0.9345	0.8253	0.0715	0.0035189	0.0395777	0.00452373	0.346261
TJP3-AP-46725	ID_46725	TJP3	AP	1	NA	NA	0	0.8879	1	0.2001	0.00354011	0.144602	0.0394264	0.530352
NUMB-ES-28288	ID_28288	NUMB	ES	13	12	14	0	0.9621	1	0.2064	0.00356471	0.188684	0.0614676	0.579196
TRMT44-AT-68771	ID_68771	TRMT44	AT	12	NA	NA	0	1	0.5543	0.048	0.00357302	0.018654	0.00128093	0.271657
TRMT44-AT-68770	ID_68770	TRMT44	AT	10.2	NA	NA	0	1	0.5543	0.048	0.00357302	53.6077	3.68112	780.683
DGUOK-ES-54015	ID_54015	DGUOK	ES	3	1	4	0	0.9983	0.6565	0.1028	0.00358189	0.0434855	0.00527374	0.358568
PPP1R7-ES-58337	ID_58337	PPP1R7	ES	1.2:1.3:2	1.1	3	0	0.9862	0.8977	0.1908	0.00365744	9.11446	2.05353	40.454
RAP1A-AP-4178	ID_4178	RAP1A	AP	2	NA	NA	0	0.769	0.7	0.1045	0.00366867	0.0673547	0.0109137	0.415683
STRN4-AA-50589	ID_50589	STRN4	AA	10.1	9.2	10.2	0	0.9362	0.7291	0.0961	0.00371601	13.2491	2.3126	75.9051
PMS1-AT-56543	ID_56543	PMS1	AT	5.3	NA	NA	0	1	0.519	0.0605	0.00372732	39.5411	3.29472	474.547
PMS1-AT-56544	ID_56544	PMS1	AT	14	NA	NA	0	1	0.519	0.0605	0.00372786	0.025291	0.00210731	0.303531
SNX15-ES-16730	ID_16730	SNX15	ES	7	6	8	0	0.9966	0.5672	0.0377	0.00378338	0.00212113	3.29e-05	0.136805
PDCD5-AP-48878	ID_48878	PDCD5	AP	2	NA	NA	0	1	0.7212	0.0798	0.00379884	13.5636	2.32048	79.2809
PDCD5-AP-48877	ID_48877	PDCD5	AP	1	NA	NA	0	1	0.7212	0.0798	0.00379934	0.0737289	0.0126136	0.430959
C8orf34-AT-84100	ID_84100	C8orf34	AT	18	NA	NA	0	0.9	1	0.2398	0.00381963	0.256133	0.101781	0.644562
ATP8B3-AT-46544	ID_46544	ATP8B3	AT	29	NA	NA	0	0.9034	1	0.2813	0.00387772	0.305768	0.136817	0.683348
ATP8B3-AT-46543	ID_46543	ATP8B3	AT	14.2	NA	NA	0	0.9034	1	0.2813	0.00387777	3.27045	1.46338	7.309
CCDC66-AT-65341	ID_65341	CCDC66	AT	11	NA	NA	0	0.9914	0.8258	0.1296	0.00392919	8.74541	2.00309	38.1821
SLC2A13-AT-21085	ID_21085	SLC2A13	AT	10	NA	NA	0	0.9707	0.9774	0.1319	0.00396007	19.2785	2.57589	144.285
SLC2A13-AT-21086	ID_21086	SLC2A13	AT	4.2	NA	NA	0	0.9707	0.9774	0.1319	0.00396027	0.0518718	0.00693081	0.388221
PSEN1-AP-28261	ID_28261	PSEN1	AP	2	NA	NA	0	0.781	0.9614	0.1011	0.00397205	11.7486	2.1974	62.8152
ATP9B-AT-46232	ID_46232	ATP9B	AT	31.3	NA	NA	0	1	0.7196	0.1287	0.00397379	0.0784215	0.0138711	0.443362
ATP9B-AT-46230	ID_46230	ATP9B	AT	5	NA	NA	0	1	0.7137	0.1286	0.00399605	12.811	2.25645	72.7343
ABHD14B-RI-65141	ID_65141	ABHD14B	RI	6.3	6.2	6.4	0	0.9707	0.6236	0.0513	0.00409132	63.8296	3.7393	1089.57
RPL34-AT-70298	ID_70298	RPL34	AT	7	NA	NA	0	1	0.9553	0.2363	0.00410586	3.19263	1.44493	7.05421
RPL34-AT-70300	ID_70300	RPL34	AT	8	NA	NA	0	1	0.9553	0.2363	0.00410586	0.313222	0.141759	0.692074
RWDD1-ES-77326	ID_77326	RWDD1	ES	2	1	3	0	0.9121	0.864	0.1127	0.00414974	9.87168	2.06295	47.2381
KIAA1257-AT-66688	ID_66688	KIAA1257	AT	9	NA	NA	0	0.9983	0.8897	0.173	0.00415178	0.185177	0.0584499	0.586667
KIAA1257-AT-66689	ID_66689	KIAA1257	AT	8.2	NA	NA	0	0.9983	0.8897	0.173	0.00415178	5.40023	1.70454	17.1087
IRF3-AD-51027	ID_51027	IRF3	AD	1.2:1.3:1.4	1.1	2	0	0.9966	0.6778	0.0776	0.00419204	0.0443021	0.00524683	0.374069
TRIM37-ES-42725	ID_42725	TRIM37	ES	24	23	25.1	0	0.9776	0.5381	0.0987	0.00419614	0.0793024	0.0139882	0.449583
MAGED2-AP-89245	ID_89245	MAGED2	AP	2	NA	NA	0	0.9741	0.8482	0.1365	0.00429226	0.115138	0.0261176	0.507579
ANAPC11-ES-44211	ID_44211	ANAPC11	ES	6	3.3	7.2	0	1	0.7342	0.0869	0.00433456	30.8012	2.92314	324.554
ZSWIM7-ES-39398	ID_39398	ZSWIM7	ES	3	2	4	0	0.9534	1	0.1144	0.00434422	6.21857	1.77113	21.8339
HSH2D-AT-48133	ID_48133	HSH2D	AT	9.3	NA	NA	0	0.9914	0.5845	0.0721	0.00434736	0.0381863	0.00404845	0.360186
ZNF169-AT-86927	ID_86927	ZNF169	AT	6.2	NA	NA	0	0.9931	0.9409	0.2006	0.00438912	0.219646	0.0774148	0.623194
TRIT1-ES-1923	ID_1923	TRIT1	ES	4	3.1	6.1	0	0.8534	0.5326	0.0818	0.00441013	0.0389202	0.00416568	0.363633
DCUN1D5-AD-18486	ID_18486	DCUN1D5	AD	1.2	1.1	2	0	0.881	0.8399	0.0614	0.00442575	0.000521346	2.86e-06	0.0950319
ARMC7-AT-43354	ID_43354	ARMC7	AT	4	NA	NA	0	1	0.6057	0.0925	0.00444764	0.057917	0.00813477	0.412351
ARMC7-AT-43353	ID_43353	ARMC7	AT	3.2	NA	NA	0	1	0.6057	0.0925	0.00444818	17.2655	2.42503	122.925
EVL-AP-29239	ID_29239	EVL	AP	1	NA	NA	0	0.8172	1	0.2778	0.00450724	3.3173	1.45015	7.58849
HMGA1-ES-75775	ID_75775	HMGA1	ES	1.3	1.1	3.1	0	0.8759	1	0.1434	0.00451164	0.141443	0.036675	0.545498
MLLT4-AT-78447	ID_78447	MLLT4	AT	33.3	NA	NA	0	1	0.5152	0.0516	0.00455714	60.6948	3.55754	1035.51
MLLT4-AT-78446	ID_78446	MLLT4	AT	36	NA	NA	0	1	0.5152	0.0516	0.00456005	0.0164793	0.000965851	0.281168
ERCC1-AP-50439	ID_50439	ERCC1	AP	2.1	NA	NA	0	0.9948	0.9536	0.1793	0.00461332	0.144444	0.0378725	0.550904
RAP1A-AP-4177	ID_4177	RAP1A	AP	1	NA	NA	0	0.769	0.7	0.0399	0.00462095	53.7373	3.41139	846.485
SEZ6L2-ES-35977	ID_35977	SEZ6L2	ES	15	14	16	0	0.9741	0.6057	0.0966	0.00462568	0.0530241	0.00694563	0.404794
KDM6B-RI-39056	ID_39056	KDM6B	RI	22.2	22.1	22.3	0	0.7828	0.7745	0.0976	0.00462647	18.2586	2.44579	136.306
RPS3A-ES-70824	ID_70824	RPS3A	ES	1.4:2.2:3.1:3.2	1.3	4.1	0	0.9552	1	0.1515	0.00465025	5.12168	1.65254	15.8736
ERCC2-ES-50432	ID_50432	ERCC2	ES	0.254954	5	9	0	0.9569	0.5375	0.0311	0.0046672	0.0112593	0.000503093	0.251986
NARFL-AP-32979	ID_32979	NARFL	AP	2.1	NA	NA	0	0.7707	0.6545	0.1262	0.00475724	9.93739	2.01785	48.9391
NARFL-AP-32978	ID_32978	NARFL	AP	1.1	NA	NA	0	0.7707	0.6545	0.1262	0.00475804	0.100633	0.020434	0.495597
FAM72A-AP-9575	ID_9575	FAM72A	AP	1	NA	NA	0	0.9638	1	0.2373	0.00478555	0.212932	0.0727006	0.623652
FAM72A-AP-9576	ID_9576	FAM72A	AP	3.1	NA	NA	0	0.9638	1	0.2373	0.00478576	4.69628	1.60344	13.7548
C20orf96-AP-58435	ID_58435	C20orf96	AP	2.1	NA	NA	0	0.9655	0.9236	0.1811	0.00480402	10.2144	2.03123	51.3648
C20orf96-AP-58436	ID_58436	C20orf96	AP	1	NA	NA	0	0.9655	0.9236	0.1811	0.00480408	0.0979016	0.0194687	0.492314
MED31-ES-38771	ID_38771	MED31	ES	4	3	5	0	0.9828	0.6716	0.1101	0.00484441	0.0950004	0.0184721	0.488579
SMTN-AP-61810	ID_61810	SMTN	AP	12	NA	NA	0	0.8379	1	0.0546	0.00495709	41.0054	3.07478	546.85
SMTN-AP-61811	ID_61811	SMTN	AP	1	NA	NA	0	0.8379	1	0.0546	0.00495709	0.024387	0.00182865	0.325226
TBC1D22A-AP-62719	ID_62719	TBC1D22A	AP	1	NA	NA	0	0.9276	1	0.2119	0.0049859	0.309345	0.136386	0.701645
ACBD4-AT-41942	ID_41942	ACBD4	AT	11	NA	NA	0	1	0.9215	0.1134	0.00504777	8.15797	1.881	35.3813
ACBD4-AT-41941	ID_41941	ACBD4	AT	12	NA	NA	0	1	0.9215	0.1134	0.00504791	0.12258	0.0282637	0.531634
ASTN2-AT-87369	ID_87369	ASTN2	AT	21	NA	NA	0	1	0.9864	0.225	0.00508056	3.73406	1.4857	9.38494
ASTN2-AT-87368	ID_87368	ASTN2	AT	25.3	NA	NA	0	1	0.9864	0.225	0.005081	0.267809	0.106555	0.673093
CCDC90B-AD-18089	ID_18089	CCDC90B	AD	1.2	1.1	2	0	0.8793	0.5887	0.1039	0.00511163	0.0761856	0.0125654	0.461925
ANKRD54-AP-62163	ID_62163	ANKRD54	AP	1	NA	NA	0	0.8776	1	0.2401	0.00511671	3.2277	1.42109	7.33101
DGUOK-ES-54006	ID_54006	DGUOK	ES	3:4:5:6	1	7	1	0.9552	0.6734	0.1279	0.00512806	0.109658	0.0233245	0.515548
HNRNPUL1-AA-50034	ID_50034	HNRNPUL1	AA	16.1:16.2	15	16.3	0	0.9862	0.7335	0.1114	0.00516524	0.0802925	0.0137093	0.470258
COQ4-AT-87736	ID_87736	COQ4	AT	7	NA	NA	0	1	0.6974	0.0831	0.00532575	0.0675226	0.0101426	0.449519
CENPM-AP-62468	ID_62468	CENPM	AP	2.1	NA	NA	0	0.9638	0.8102	0.0839	0.00533894	10.1043	1.98514	51.4309
SUPT20H-ES-25661	ID_25661	SUPT20H	ES	26	25	27	0	1	0.8094	0.1154	0.00535494	11.5077	2.06193	64.2245
THOC3-AP-74615	ID_74615	THOC3	AP	1	NA	NA	0	0.9931	0.6706	0.036	0.00539331	234.511	5.01969	10956
THOC3-AP-74616	ID_74616	THOC3	AP	2	NA	NA	0	0.9931	0.6706	0.036	0.00539331	0.00426418	9.13e-05	0.199215
ALG10B-AT-21067	ID_21067	ALG10B	AT	3	NA	NA	0	0.981	0.6806	0.1274	0.00539862	0.125418	0.029053	0.54141
ALG10B-AT-21068	ID_21068	ALG10B	AT	4	NA	NA	0	0.981	0.6806	0.1274	0.00539862	7.97336	1.84703	34.4198
YY1AP1-AP-8098	ID_8098	YY1AP1	AP	2	NA	NA	0	0.7983	0.9497	0.1614	0.00543771	0.141761	0.035757	0.562021
SEC14L1-AP-43701	ID_43701	SEC14L1	AP	4.1	NA	NA	0	0.9052	0.9485	0.2298	0.00546384	0.256481	0.0982145	0.669784
CCDC66-AT-65343	ID_65343	CCDC66	AT	24	NA	NA	0	0.9914	0.9671	0.1468	0.00548299	0.157199	0.0425946	0.580153
SGK1-AP-77771	ID_77771	SGK1	AP	1	NA	NA	0	0.7879	0.5288	0.0379	0.00558187	200.037	4.7177	8481.83
MFF-ES-57813	ID_57813	MFF	ES	0.127836	1	6	0	0.8362	1	0.2507	0.00559159	3.55845	1.44984	8.73375
SLC25A35-AT-39149	ID_39149	SLC25A35	AT	5.3	NA	NA	0	1	0.883	0.1362	0.00563188	11.1371	2.02163	61.3538
SLC25A35-AT-39151	ID_39151	SLC25A35	AT	7.5	NA	NA	0	1	0.883	0.1362	0.00563232	0.0897934	0.0162997	0.494663
WAC-ES-11105	ID_11105	WAC	ES	9	8	10	0	0.981	0.5412	0.0743	0.00569472	0.0386113	0.00384467	0.387766
GSN-AP-87420	ID_87420	GSN	AP	13	NA	NA	0	0.9483	0.5017	0.0495	0.00569655	1.31e-05	4.55e-09	0.0379342
KIN-AA-10722	ID_10722	KIN	AA	13.1	12.1	13.2	0	0.9948	0.7804	0.1154	0.00570823	39.0802	2.90489	525.756
INIP-ES-87252	ID_87252	INIP	ES	4	3	5	0	0.9431	0.5504	0.0623	0.00573784	0.0167358	0.000918957	0.304787
GPR137B-AT-10367	ID_10367	GPR137B	AT	7	NA	NA	0	0.9966	0.7335	0.0521	0.00585238	0.0237161	0.00165734	0.339373
GPR137B-AT-10366	ID_10366	GPR137B	AT	4.2	NA	NA	0	0.9966	0.7335	0.0521	0.00585299	42.1642	2.94649	603.37
SERGEF-ES-14558	ID_14558	SERGEF	ES	12	11	14	0	0.9966	0.7929	0.1016	0.00585427	20.9835	2.40852	182.811
PAM-ES-72891	ID_72891	PAM	ES	23.2:25.1:25.2	22	26.1	0	0.881	0.831	0.1654	0.00588283	0.140339	0.0346973	0.567623
TJP3-AP-46727	ID_46727	TJP3	AP	2	NA	NA	0	0.8879	1	0.1962	0.00588379	6.37783	1.70625	23.8398
DGUOK-ES-54012	ID_54012	DGUOK	ES	0.127778	1	7	1	0.9621	0.5417	0.0978	0.00598522	0.0686416	0.0101621	0.463653
CDHR4-AT-64919	ID_64919	CDHR4	AT	3.4	NA	NA	0	0.9103	0.9801	0.3485	0.00599105	2.59751	1.31495	5.13102
CDHR4-AT-64918	ID_64918	CDHR4	AT	18	NA	NA	0	0.9103	0.9801	0.3485	0.00599142	0.384988	0.194895	0.760489
CCDC180-AT-86996	ID_86996	CCDC180	AT	54	NA	NA	0	0.8224	1	0.1896	0.00601467	0.217173	0.0730496	0.645644
ZNF384-ES-19923	ID_19923	ZNF384	ES	8	7	9	0	0.9776	0.8344	0.1201	0.00607936	0.0908209	0.0163645	0.504044
ZFAND4-AT-11368	ID_11368	ZFAND4	AT	6	NA	NA	0	0.9862	0.8752	0.0778	0.00617267	8.28256	1.82398	37.6106
AUH-AT-86822	ID_86822	AUH	AT	7	NA	NA	0	0.9983	0.9813	0.113	0.00617425	5.75505	1.64457	20.1393
AUH-AT-86823	ID_86823	AUH	AT	11	NA	NA	0	0.9983	0.9813	0.113	0.00617766	0.173774	0.0496566	0.608125
PTOV1-AP-51094	ID_51094	PTOV1	AP	1	NA	NA	0	0.981	0.879	0.1026	0.00623902	10.0232	1.92153	52.2832
PTOV1-AP-51095	ID_51095	PTOV1	AP	2	NA	NA	0	0.981	0.879	0.1026	0.00623915	0.0997692	0.0191267	0.52042
CAPS2-AT-23445	ID_23445	CAPS2	AT	22	NA	NA	0	0.7707	1	0.1968	0.00624386	0.213728	0.0707249	0.645881
CAPS2-AT-23446	ID_23446	CAPS2	AT	21	NA	NA	0	0.7707	1	0.1968	0.00624451	4.67874	1.54824	14.139
TMEM234-RI-1571	ID_1571	TMEM234	RI	5.5	5.4	5.6	0	1	0.6076	0.0963	0.00627133	28.4811	2.5794	314.482
FAM189B-ES-8050	ID_8050	FAM189B	ES	0.085463	1	5	0	0.9707	0.6986	0.1241	0.00628728	0.104723	0.0207546	0.528406
CSAD-RI-21955	ID_21955	CSAD	RI	10.2:10.3	10.1	10.4	0	0.8121	0.966	0.1648	0.00629081	5.90237	1.6517	21.0922
ADAM15-ES-7906	ID_7906	ADAM15	ES	21.1:21.2	20	23	0	0.9966	0.5525	0.0752	0.00644297	24.3012	2.44777	241.259
GNAS-ES-60006	ID_60006	GNAS	ES	6	5	8.1	0	1	0.5751	0.0919	0.00644916	0.0333149	0.00288178	0.385137
BANP-ES-37989	ID_37989	BANP	ES	16	15	17	0	0.9466	0.814	0.1253	0.00646413	9.80156	1.89604	50.669
PEX7-ES-77922	ID_77922	PEX7	ES	9	8	10	0	0.8638	0.557	0.0506	0.00649585	176.936	4.2567	7354.58
EPS15L1-AT-48158	ID_48158	EPS15L1	AT	24	NA	NA	0	1	0.7647	0.1211	0.0065362	0.0980465	0.0183897	0.522744
KIAA1456-AT-82760	ID_82760	KIAA1456	AT	8	NA	NA	0	1	0.5556	0.0977	0.00662825	0.0630836	0.00858148	0.463735
CBR4-AT-71137	ID_71137	CBR4	AT	6	NA	NA	0	1	0.7145	0.0746	0.0066738	0.0801552	0.0129421	0.496429
EEF1B2-RI-57142	ID_57142	EEF1B2	RI	1.2	1.1	1.3	0	0.9914	0.8041	0.0826	0.00683132	0.0589744	0.00758417	0.458584
BCL2L12-ES-51036	ID_51036	BCL2L12	ES	3.2	2	4	0	0.7517	1	0.2092	0.00683364	0.215826	0.071054	0.655572
ECHDC2-AA-3025	ID_3025	ECHDC2	AA	6.1	5.1	6.2	0	0.95	0.7962	0.1452	0.00684153	9.23959	1.84429	46.2888
ANKRD54-AP-62161	ID_62161	ANKRD54	AP	2	NA	NA	0	0.8776	1	0.2435	0.00688033	0.323422	0.142642	0.733321
IGF2-AP-13898	ID_13898	IGF2	AP	5	NA	NA	0	0.8138	0.9798	0.1972	0.00689275	4.39945	1.50207	12.8857
NMRAL1-AD-33737	ID_33737	NMRAL1	AD	2.4	2.3	2.6	0	0.8983	1	0.1671	0.00694916	0.191698	0.0577726	0.636085
EEF1B2-RI-57143	ID_57143	EEF1B2	RI	1.2:1.3	1.1	1.4	0	1	0.7635	0.0762	0.00697553	0.0473734	0.00516867	0.4342
KDM4C-AT-85827	ID_85827	KDM4C	AT	21	NA	NA	0	1	0.585	0.0632	0.00698309	0.00298128	4.36e-05	0.203875
CPSF6-ES-23309	ID_23309	CPSF6	ES	2.2:4:5:6.1:6.2:7:8.1:8.2:9:10:11.1	2.1	11.2	0	0.9034	0.822	0.1256	0.0069936	0.152801	0.0390166	0.598419
LTBP3-ES-16865	ID_16865	LTBP3	ES	25	24	26	0	0.9862	0.786	0.1449	0.00700821	0.122506	0.0266299	0.563568
ANKHD1-AT-73653	ID_73653	ANKHD1	AT	38	NA	NA	0	1	0.5905	0.1007	0.00701015	0.0578438	0.00728705	0.459159
ZNF846-AT-47400	ID_47400	ZNF846	AT	9	NA	NA	0	0.8793	0.5821	0.1192	0.00707577	10.0893	1.87638	54.2499
SREBF1-ES-39505	ID_39505	SREBF1	ES	8	7	9	0	0.9759	0.6569	0.0798	0.00720914	10.8946	1.90832	62.197
CCDC180-AT-86995	ID_86995	CCDC180	AT	16	NA	NA	0	0.8224	0.8077	0.1706	0.00731542	5.08561	1.54947	16.6917
RBM43-AT-55565	ID_55565	RBM43	AT	5	NA	NA	0	0.9966	0.8092	0.1307	0.00731599	16.8622	2.13964	132.889
RBM43-AT-55566	ID_55566	RBM43	AT	2	NA	NA	0	0.9966	0.8092	0.1307	0.00731599	0.0593043	0.0075251	0.467369
SAA2-AT-14579	ID_14579	SAA2	AT	7	NA	NA	0	0.8621	0.7945	0.0813	0.00745161	12.5526	1.96781	80.0723
PROM1-ES-68825	ID_68825	PROM1	ES	1.14444	25	30	0	0.8431	0.5463	0.0856	0.00753228	0.048213	0.00521632	0.445619
TSPAN31-ES-22732	ID_22732	TSPAN31	ES	2.1:2.2:3	1	5.1	0	0.9724	0.9199	0.045	0.0075358	0.0739069	0.0109371	0.499422
ARHGEF1-ES-50100	ID_50100	ARHGEF1	ES	29	28	30	0	1	0.5973	0.0846	0.00755433	59.3982	2.96734	1188.99
PIDD-AD-13766	ID_13766	PIDD	AD	12.2	12.1	13	0	0.9534	0.8442	0.1214	0.00755968	11.9897	1.93742	74.1982
SLMAP-AT-65391	ID_65391	SLMAP	AT	26	NA	NA	0	1	0.5116	0.0483	0.00763801	0.0400071	0.00375935	0.425758
TM2D3-ES-32771	ID_32771	TM2D3	ES	1.3	1.1	2.2	0	0.9293	0.8837	0.1281	0.00767974	10.912	1.88287	63.2399
C22orf39-AT-61055	ID_61055	C22orf39	AT	4	NA	NA	0	1	0.5369	0.1094	0.00768646	0.0757834	0.0113692	0.505149
ZNF101-RI-48677	ID_48677	ZNF101	RI	5.2	5.1	5.3	0	0.9759	0.699	0.1696	0.00769506	0.169501	0.0459522	0.62523
FBXO16-AT-83216	ID_83216	FBXO16	AT	19	NA	NA	0	0.9931	0.9291	0.1014	0.00770853	16.4337	2.09646	128.821
AGBL5-ES-52926	ID_52926	AGBL5	ES	14	13	15	0	0.819	0.955	0.1783	0.00770894	6.71503	1.65462	27.252
UBE2E1-AP-63715	ID_63715	UBE2E1	AP	3	NA	NA	0	0.8914	0.7797	0.1547	0.00771103	5.7968	1.59145	21.1147
UBE2E1-AP-63714	ID_63714	UBE2E1	AP	1	NA	NA	0	0.8914	0.7797	0.1547	0.00771324	0.17252	0.0473633	0.628399
COL18A1-AP-60875	ID_60875	COL18A1	AP	3.1	NA	NA	0	0.881	1	0.3048	0.00790062	2.72252	1.30024	5.70055
COL18A1-AP-60874	ID_60874	COL18A1	AP	1	NA	NA	0	0.881	1	0.3048	0.0079009	0.36731	0.175423	0.769092
MRPL23-AT-13894	ID_13894	MRPL23	AT	5.3	NA	NA	0	0.9897	0.8587	0.1133	0.00796908	0.104952	0.0198533	0.554822
NMRAL1-AD-33740	ID_33740	NMRAL1	AD	2.3	2.2	2.6	0	0.9534	1	0.2098	0.00797329	3.64038	1.40158	9.45528
ERBB2IP-ES-72264	ID_72264	ERBB2IP	ES	24.1:24.2:24.3	21	25	0	0.9534	0.5286	0.0974	0.0079934	0.0558064	0.00661517	0.47079
TMEM107-RI-39107	ID_39107	TMEM107	RI	3.6	3.5	3.7	0	0.919	0.9454	0.0964	0.00799661	8.95889	1.77234	45.2859
RBM14-RBM4-ES-17102	ID_17102	RBM14-RBM4	ES	0.00142477	1	4	0	0.7983	0.7486	0.1023	0.00801597	0.047236	0.00494618	0.451104
SLC38A10-AT-44115	ID_44115	SLC38A10	AT	14.2	NA	NA	0	1	0.5043	0.0729	0.0080763	20.4879	2.19324	191.386
SLC38A10-AT-44114	ID_44114	SLC38A10	AT	16	NA	NA	0	1	0.5043	0.0729	0.0080763	0.0488092	0.00522504	0.455946
ATXN2L-ES-35848	ID_35848	ATXN2L	ES	22.2:22.3:22.4:22.6	22.1	22.7	0	0.9276	1	0.1637	0.00808875	0.133179	0.0299541	0.592129
AXIN1-ES-32866	ID_32866	AXIN1	ES	9	8	10	0	0.9862	0.8814	0.1399	0.00814733	0.114028	0.0228291	0.569553
SLC3A2-AP-16462	ID_16462	SLC3A2	AP	1	NA	NA	0	0.9983	0.5407	0.0816	0.00819886	19.6366	2.15997	178.518
TSSC1-ES-52552	ID_52552	TSSC1	ES	6	4	7	0	0.9845	0.5734	0.035	0.00829828	0.0173859	0.000858114	0.352248
GNB2L1-ES-75087	ID_75087	GNB2L1	ES	1.2:2.1:2.2:2.3:3:5:6:7.2:8.1	1.1	8.2	0	0.9983	1	0.0469	0.00831277	0.0917497	0.0155656	0.540807
C12orf76-AT-24404	ID_24404	C12orf76	AT	9.2	NA	NA	0	1	0.7426	0.0672	0.00833425	13.9002	1.96724	98.2164
ANKDD1A-AT-31137	ID_31137	ANKDD1A	AT	8.2	NA	NA	0	0.9983	0.8841	0.1462	0.00834424	6.08816	1.59072	23.3013
ANKDD1A-AT-31138	ID_31138	ANKDD1A	AT	16	NA	NA	0	0.9983	0.8841	0.1462	0.00834483	0.164255	0.0429166	0.628658
ANKHD1-AT-73652	ID_73652	ANKHD1	AT	35	NA	NA	0	1	0.6308	0.1096	0.00836963	14.0757	1.97149	100.496
SIMC1-ES-74638	ID_74638	SIMC1	ES	0.085463	1	5	0	0.75	0.6324	0.0813	0.00842845	0.0598463	0.00736493	0.486301
WDR96-AT-13040	ID_13040	WDR96	AT	38	NA	NA	0	0.8638	1	0.212	0.00842868	0.282307	0.11017	0.723401
TOM1L1-AT-42534	ID_42534	TOM1L1	AT	12.2	NA	NA	0	1	0.6544	0.0901	0.00845409	11.5327	1.86878	71.1708
MAGED2-AP-89247	ID_89247	MAGED2	AP	1	NA	NA	0	0.9741	0.8714	0.1637	0.00845713	5.17454	1.5224	17.588
TMEM107-ES-39129	ID_39129	TMEM107	ES	2:3.2:3.3:3.4:3.5	1	3.7	0	0.8414	0.9853	0.2167	0.00848075	3.24908	1.35118	7.81282
KATNAL2-AT-45430	ID_45430	KATNAL2	AT	17	NA	NA	0	0.8914	0.7247	0.1237	0.00850011	9.4624	1.7745	50.4576
KATNAL2-AT-45429	ID_45429	KATNAL2	AT	20	NA	NA	0	0.8914	0.7247	0.1237	0.00850055	0.105683	0.0198188	0.563548
INCENP-ES-16337	ID_16337	INCENP	ES	11	10	12	0	0.7569	1	0.1934	0.00852608	4.25117	1.44614	12.497
SON-AT-60435	ID_60435	SON	AT	15.2	NA	NA	0	1	0.5276	0.0569	0.00852793	0.0153289	0.000681567	0.344757
PTK2-AP-85292	ID_85292	PTK2	AP	2	NA	NA	0	0.9121	0.5267	0.0815	0.00856763	17.0367	2.05736	141.078
RRM1-AP-14033	ID_14033	RRM1	AP	9	NA	NA	0	0.8879	1	0.09	0.00863916	5.38194	1.53247	18.9011
RRM1-AP-14034	ID_14034	RRM1	AP	1	NA	NA	0	0.8879	1	0.09	0.00863916	0.185807	0.0529071	0.652542
SERINC2-AP-1471	ID_1471	SERINC2	AP	4	NA	NA	0	0.9345	0.8253	0.0704	0.00865738	20.9901	2.16291	203.699
LETMD1-ES-21744	ID_21744	LETMD1	ES	0.170208	3.2	7	0	0.9379	1	0.1289	0.00867159	12.7272	1.90457	85.0484
CYTH2-AA-50769	ID_50769	CYTH2	AA	9.1	8.1	9.2	0	1	0.6231	0.0894	0.00867521	24.6452	2.25129	269.795
IQCG-AT-68333	ID_68333	IQCG	AT	10.2	NA	NA	0	0.9983	0.7547	0.098	0.00867916	10.4311	1.81062	60.0937
IQCG-AT-68332	ID_68332	IQCG	AT	14	NA	NA	0	0.9983	0.7547	0.098	0.00867991	0.0958702	0.0166412	0.552311
ADAMTS2-AT-74892	ID_74892	ADAMTS2	AT	23	NA	NA	0	1	0.6907	0.1466	0.0086837	0.149688	0.0362382	0.618315
ADAMTS2-AT-74891	ID_74891	ADAMTS2	AT	11	NA	NA	0	1	0.6907	0.1466	0.008684	6.68051	1.61729	27.5951
FAM135A-AT-76635	ID_76635	FAM135A	AT	22.2	NA	NA	0	0.9983	0.7982	0.0876	0.00883669	11.2818	1.83912	69.2071
FAM135A-AT-76634	ID_76634	FAM135A	AT	23	NA	NA	0	0.9983	0.7982	0.0876	0.00883813	0.088641	0.0144497	0.543765
WDR78-AT-3330	ID_3330	WDR78	AT	18	NA	NA	0	0.9466	0.7802	0.1562	0.00884113	0.180958	0.050326	0.650673
CIRBP-RI-46423	ID_46423	CIRBP	RI	9.7	9.6	9.8	0	1	0.8421	0.0839	0.00884759	64.5771	2.8504	1463.02
PHF8-RI-89235	ID_89235	PHF8	RI	26.2	26.1	26.3	0	1	0.8184	0.1199	0.00894812	13.1209	1.90428	90.4062
WDR96-AT-13039	ID_13039	WDR96	AT	11.2	NA	NA	0	0.8638	1	0.1404	0.00902213	5.39083	1.52222	19.0912
LRRC37B-ES-40172	ID_40172	LRRC37B	ES	11	10	12	0	0.9259	0.6462	0.0818	0.0091026	0.024687	0.00152918	0.398546
GLB1-AP-63827	ID_63827	GLB1	AP	2	NA	NA	0	0.9293	1	0.0845	0.00923986	12.3429	1.86052	81.8838
GLB1-AP-63829	ID_63829	GLB1	AP	1	NA	NA	0	0.9293	1	0.0845	0.00924063	0.0810195	0.0122125	0.537496
SMEK2-ES-53625	ID_53625	SMEK2	ES	10	9	11	0	0.8534	1	0.1395	0.00925317	7.65117	1.65272	35.4206
TMEM205-AD-47659	ID_47659	TMEM205	AD	2.3:2.4:2.5:2.6	2.2	3	0	0.9966	0.553	0.0805	0.00926234	0.066947	0.00873541	0.513073
NFX1-AT-86101	ID_86101	NFX1	AT	25	NA	NA	0	1	0.7322	0.1044	0.00930571	0.0792364	0.0117245	0.535494
CD33-AT-51314	ID_51314	CD33	AT	6.3	NA	NA	0	0.8845	0.9292	0.1653	0.00930978	4.21146	1.42495	12.4471
CD33-AT-51313	ID_51313	CD33	AT	7	NA	NA	0	0.8845	0.9292	0.1653	0.00930978	0.237447	0.0803403	0.70178
PI4KB-ES-7591	ID_7591	PI4KB	ES	5	4	6	0	0.8914	0.7742	0.1427	0.0093115	0.104788	0.0191382	0.573744
RPL30-ES-84639	ID_84639	RPL30	ES	2.1:2.2	1.3	3.1	0	0.9914	0.7055	0.1109	0.00935594	0.130815	0.0282131	0.606549
PGAP2-ES-14016	ID_14016	PGAP2	ES	6	5	10	0	0.7741	0.5548	0.1051	0.00949661	0.0623587	0.00765991	0.507657
ABCB8-RI-82298	ID_82298	ABCB8	RI	6.2	6.1	6.3	0	0.8741	1	0.0934	0.00958205	8.64163	1.69039	44.1779
HNRNPC-ES-26558	ID_26558	HNRNPC	ES	2.4	1	3.2	0	0.9931	0.6337	0.0792	0.00962233	42.695	2.48988	732.108
RHOT2-AA-32946	ID_32946	RHOT2	AA	2.1	1	2.2	0	0.919	0.6442	0.0677	0.00965935	0.0506714	0.00529377	0.485022
PLCE1-AT-12579	ID_12579	PLCE1	AT	33.2	NA	NA	0	1	0.8548	0.2052	0.00966023	3.7356	1.37675	10.136
PLCE1-AT-12578	ID_12578	PLCE1	AT	34	NA	NA	0	1	0.8548	0.2052	0.00966124	0.267699	0.0986602	0.72636
HAUS4-AD-26679	ID_26679	HAUS4	AD	1.2:1.3	1.1	2	0	0.7862	0.7931	0.1611	0.00966215	6.5297	1.57644	27.0463
C5orf63-AT-73182	ID_73182	C5orf63	AT	5.2	NA	NA	0	0.9914	0.7993	0.1444	0.00970856	5.95423	1.54022	23.018
PPP4R2-AT-65624	ID_65624	PPP4R2	AT	4	NA	NA	0	1	0.6919	0.0598	0.00972668	13.2938	1.86992	94.5102
PPP4R2-AT-65623	ID_65623	PPP4R2	AT	11	NA	NA	0	1	0.6919	0.0598	0.00973099	0.0752297	0.0105813	0.534857
MFF-ES-57814	ID_57814	MFF	ES	0.128472	1	6	0	0.9914	0.5936	0.0704	0.00973113	160.396	3.41473	7534.11
IST1-AP-37514	ID_37514	IST1	AP	3	NA	NA	0	0.8897	1	0.1677	0.0097594	3.76611	1.37759	10.296
EHF-AP-14954	ID_14954	EHF	AP	4	NA	NA	0	0.7948	0.9387	0.0997	0.00978308	6.8599	1.59156	29.5673
PARP6-AA-31528	ID_31528	PARP6	AA	18.1	17	18.2	0	0.9448	0.7967	0.0915	0.00981599	0.044752	0.00423407	0.473006
CEP76-AT-44705	ID_44705	CEP76	AT	13.2	NA	NA	0	0.9879	0.9764	0.1274	0.00981632	0.200213	0.0590623	0.678692
UBXN11-ES-1256	ID_1256	UBXN11	ES	4:5:6:7:8:9	2	10	0	0.8983	0.7944	0.1721	0.00993775	0.209989	0.0641037	0.687875
BAHD1-AA-29982	ID_29982	BAHD1	AA	7.1	6	7.2	0	0.8069	0.784	0.1336	0.00999317	0.109149	0.0202353	0.588747
PIEZO1-ES-38024	ID_38024	PIEZO1	ES	45	44	46	0	0.781	0.6125	0.0887	0.00999526	13.0352	1.84787	91.9519
MARVELD3-AT-37467	ID_37467	MARVELD3	AT	4	NA	NA	0	0.9931	0.5964	0.0975	0.0100036	13.0366	1.84752	91.9897
CHEK1-AP-19307	ID_19307	CHEK1	AP	1	NA	NA	0	0.9862	0.8098	0.1675	0.010111	0.212298	0.065171	0.691572
CHEK1-AP-19309	ID_19309	CHEK1	AP	2.1	NA	NA	0	0.9862	0.8098	0.1675	0.0101136	4.71012	1.4459	15.3435
BCAP29-AT-81359	ID_81359	BCAP29	AT	12	NA	NA	0	1	0.7961	0.1007	0.0101426	0.102866	0.0181665	0.582469
GNAS-ES-60005	ID_60005	GNAS	ES	6	5	8.2	0	0.9983	0.5007	0.0726	0.0102313	0.0401733	0.00345454	0.46718
WIZ-ES-48090	ID_48090	WIZ	ES	9	8	10	0	0.9466	0.8341	0.1547	0.0102553	0.178057	0.0476833	0.664893
CHMP2A-AP-52483	ID_52483	CHMP2A	AP	2	NA	NA	0	1	0.5576	0.08	0.0103181	18.7884	1.99747	176.725
COX20-ES-10475	ID_10475	COX20	ES	3	1	4	1	1	0.8612	0.1549	0.010336	6.24335	1.53985	25.3138
C5orf63-AT-73181	ID_73181	C5orf63	AT	6.2	NA	NA	0	0.9914	0.9502	0.2022	0.0104095	0.275482	0.102741	0.738657
RABL2B-ES-62920	ID_62920	RABL2B	ES	4	3.2	5	0	0.8776	0.855	0.0599	0.0104185	14.0635	1.86062	106.299
ASB7-AT-32737	ID_32737	ASB7	AT	5.2	NA	NA	0	1	0.5575	0.0704	0.0104438	24.2801	2.11354	278.927
ASB7-AT-32736	ID_32736	ASB7	AT	6	NA	NA	0	1	0.5575	0.0704	0.0104445	0.0411869	0.00358522	0.473154
ATXN2L-ES-35851	ID_35851	ATXN2L	ES	22.2:22.6	22.1	22.7	0	0.9	0.8412	0.1597	0.0105455	0.166249	0.0420298	0.657594
CCDC24-AA-2532	ID_2532	CCDC24	AA	4.1	3.2	4.2	0	0.7569	1	0.1934	0.0106704	4.43001	1.41323	13.8866
MLH3-ES-28469	ID_28469	MLH3	ES	8	6	9	0	0.7707	1	0.1714	0.010697	0.20313	0.0597349	0.690746
ATP5D-RI-46401	ID_46401	ATP5D	RI	4.2:4.3	4.1	4.4	0	0.9983	0.6847	0.136	0.0107294	7.60031	1.60023	36.0978
HSPD1-AD-56693	ID_56693	HSPD1	AD	2.2	2.1	3.1	0	0.9707	0.5125	0.0498	0.0107645	4364.27	6.95832	2.73727e+06
TOM1L1-AT-42538	ID_42538	TOM1L1	AT	19	NA	NA	0	1	0.6783	0.093	0.0107834	0.101486	0.0174829	0.58912
FAM178A-AT-12841	ID_12841	FAM178A	AT	6.2	NA	NA	0	1	0.5497	0.0537	0.0108371	23.1954	2.06573	260.453
RPL29-RI-65167	ID_65167	RPL29	RI	3.2	3.1	3.3	0	0.9552	0.6949	0.1308	0.0109375	0.155236	0.0369728	0.651784
RPAIN-ES-38679	ID_38679	RPAIN	ES	6.1	5	7	0	1	0.5889	0.0795	0.0110397	37.9191	2.29741	625.859
TRAPPC6A-AD-50412	ID_50412	TRAPPC6A	AD	1.2	1.1	3	0	0.8155	1	0.1657	0.0110409	5.60841	1.48363	21.201
MED24-ES-40831	ID_40831	MED24	ES	7	6	8	0	0.8259	0.8095	0.1273	0.0110525	5.75155	1.49191	22.1731
EPS15L1-AT-48154	ID_48154	EPS15L1	AT	23.2	NA	NA	0	1	0.5743	0.089	0.0111491	14.693	1.8442	117.06
GPR56-AP-36574	ID_36574	GPR56	AP	4	NA	NA	0	0.9276	0.5303	0.0296	0.0111963	85.3637	2.74775	2651.97
TTC21B-AT-55811	ID_55811	TTC21B	AT	29.2	NA	NA	0	0.9983	0.7967	0.146	0.0112087	8.22253	1.61388	41.8928
TTC21B-AT-55812	ID_55812	TTC21B	AT	33	NA	NA	0	0.9983	0.7967	0.146	0.0112103	0.121622	0.0238716	0.61965
IP6K2-AT-64743	ID_64743	IP6K2	AT	11.9	NA	NA	0	1	0.7937	0.1504	0.0112899	6.26068	1.51483	25.875
IP6K2-AT-64742	ID_64742	IP6K2	AT	15	NA	NA	0	1	0.7937	0.1504	0.0112904	0.159729	0.0386479	0.660149
DDX59-AT-9334	ID_9334	DDX59	AT	10	NA	NA	0	1	0.8209	0.0838	0.0113114	8.82377	1.63649	47.5768
MAP2K6-AP-43187	ID_43187	MAP2K6	AP	2	NA	NA	0	0.8983	1	0.2502	0.0113255	0.326411	0.137231	0.776382
MAP2K6-AP-43186	ID_43186	MAP2K6	AP	1	NA	NA	0	0.8983	1	0.2502	0.0113257	3.06362	1.28802	7.28696
ZNF664-AD-25137	ID_25137	ZNF664	AD	1.2	1.1	1.4	0	0.8207	0.7577	0.127	0.0114418	0.116255	0.0219323	0.616225
RARRES2-RI-82227	ID_82227	RARRES2	RI	1.2:1.3	1.1	1.4	0	0.8466	0.639	0.142	0.0114651	20.8922	1.98005	220.44
NEK2-AT-9717	ID_9717	NEK2	AT	8	NA	NA	0	0.9897	1	0.1289	0.011599	0.190479	0.0525597	0.690308
NEK2-AT-9718	ID_9718	NEK2	AT	7.2	NA	NA	0	0.9897	1	0.1289	0.0115998	5.24986	1.44861	19.0259
ITIH5-AT-10716	ID_10716	ITIH5	AT	13	NA	NA	0	0.8776	0.8467	0.1925	0.0116056	4.10107	1.37072	12.2701
ITIH5-AT-10715	ID_10715	ITIH5	AT	16.2	NA	NA	0	0.8776	0.8467	0.1925	0.0116065	0.243842	0.0815	0.729556
PSEN1-AP-28260	ID_28260	PSEN1	AP	1.1	NA	NA	0	0.781	1	0.1917	0.0116551	0.340382	0.147331	0.786388
GGCX-ES-54288	ID_54288	GGCX	ES	2	1	3.1	0	0.9983	0.5556	0.0967	0.0116766	16.5131	1.86772	145.997
MFAP3L-AT-71161	ID_71161	MFAP3L	AT	7	NA	NA	0	0.9914	0.7992	0.1782	0.011749	5.24423	1.44494	19.0333
MFAP3L-AT-71160	ID_71160	MFAP3L	AT	5.4	NA	NA	0	0.9914	0.7992	0.1782	0.0117493	0.190687	0.05254	0.692075
SSBP4-ES-48431	ID_48431	SSBP4	ES	7	6	8	0	0.9931	0.8696	0.1336	0.0118186	6.66141	1.52193	29.1567
PFDN5-ES-22008	ID_22008	PFDN5	ES	4.1:4.2	1	5	0	1	0.5624	0.0638	0.0118328	34.2342	2.18592	536.149
RTKN2-AT-11871	ID_11871	RTKN2	AT	14	NA	NA	0	0.9948	0.7753	0.106	0.0118943	11.1661	1.70352	73.1911
ZCCHC17-ES-1461	ID_1461	ZCCHC17	ES	3	2	4	0	0.9259	0.7585	0.07	0.012038	0.00807179	0.000187617	0.347271
KRTCAP3-AA-53015	ID_53015	KRTCAP3	AA	7.1	6	7.2	0	0.9259	0.7043	0.0977	0.0120461	0.0695049	0.00867111	0.55713
ABHD11-ES-80028	ID_80028	ABHD11	ES	5	3	6	0	0.869	0.7739	0.1521	0.0120527	0.153672	0.0356114	0.663134
FYN-ME-77273	ID_77273	FYN	ME	11|12	10	13	0	0.9586	0.8993	0.182	0.0121015	5.37683	1.4451	20.0058
CSAD-ES-21968	ID_21968	CSAD	ES	8:9:10.1:10.4	7.2	11	0	0.8534	0.7228	0.0551	0.0121562	0.0189606	0.00085466	0.420641
ARMC3-AT-10987	ID_10987	ARMC3	AT	17	NA	NA	0	0.8397	1	0.2187	0.0122056	3.45034	1.30984	9.08874
ARMC3-AT-10988	ID_10988	ARMC3	AT	20	NA	NA	0	0.8397	1	0.2187	0.0122068	0.289831	0.110028	0.763463
UBE2D2-AP-73617	ID_73617	UBE2D2	AP	3.1	NA	NA	0	1	0.6256	0.0719	0.0122098	0.00012881	1.17e-07	0.142025
APOD-ES-68181	ID_68181	APOD	ES	3	2	4	0	0.7707	1	0.2548	0.0123349	2.94031	1.26338	6.8431
UNC5C-AT-69990	ID_69990	UNC5C	AT	6	NA	NA	0	0.9828	0.5845	0.0661	0.0123366	13.33	1.75313	101.355
CRYZL1-ES-60462	ID_60462	CRYZL1	ES	7	6	9	0	0.8259	0.5503	0.0316	0.0123463	5.75e-05	2.74e-08	0.120565
TIRAP-AT-19382	ID_19382	TIRAP	AT	8	NA	NA	0	0.9862	0.7139	0.1047	0.0123914	0.0700711	0.00872463	0.56277
ANAPC11-AD-44223	ID_44223	ANAPC11	AD	3.3	3.2	6	0	0.9966	0.7082	0.0737	0.0124306	57.9205	2.40226	1396.51
TSC22D3-AP-89836	ID_89836	TSC22D3	AP	4	NA	NA	0	0.9724	0.8104	0.1236	0.0124422	10.5668	1.66333	67.1289
WDR90-AA-32931	ID_32931	WDR90	AA	34.1	33	34.2	0	0.8034	0.8389	0.0941	0.0124652	0.0875875	0.0129687	0.591543
RASSF7-RI-13690	ID_13690	RASSF7	RI	6.2:6.3:6.4	6.1	6.5	0	0.9966	0.6042	0.0911	0.0125344	26.6645	2.02562	351.001
PAM-ES-72894	ID_72894	PAM	ES	23.2:25.2	22	26.1	0	0.9362	0.8022	0.1479	0.0125369	0.175699	0.0448627	0.688099
FBXL8-RI-36937	ID_36937	FBXL8	RI	2.2:2.3	2.1	2.4	0	0.9569	0.9415	0.224	0.0127045	3.18079	1.28021	7.90295
CSDE1-ES-4333	ID_4333	CSDE1	ES	6	5	7	0	0.9724	0.5933	0.0619	0.0127728	42.3916	2.22031	809.368
ARMCX4-AT-89646	ID_89646	ARMCX4	AT	10.2	NA	NA	0	0.9707	0.9755	0.2523	0.0128057	0.352061	0.154746	0.800969
CCDC40-AT-44016	ID_44016	CCDC40	AT	11	NA	NA	0	0.9948	0.8724	0.1381	0.0128144	5.35582	1.42852	20.0801
NPIPB4-AA-34758	ID_34758	NPIPB4	AA	9.9	9.7	9.1	0	0.8724	0.5919	0.1209	0.0128702	0.0865196	0.0125773	0.595171
RAD51C-AT-42711	ID_42711	RAD51C	AT	10	NA	NA	0	0.9983	0.859	0.14	0.0129207	7.03571	1.51104	32.7597
BCAP29-AT-81357	ID_81357	BCAP29	AT	11	NA	NA	0	1	0.7682	0.0957	0.012984	8.23862	1.56054	43.4946
DTNB-ES-52867	ID_52867	DTNB	ES	17	16	19	0	0.9707	0.7078	0.0621	0.0130353	2041.58	4.97769	837345
ZBTB17-ES-782	ID_782	ZBTB17	ES	4	3	5.2	0	0.9793	0.815	0.0533	0.0130554	0.0504637	0.0047738	0.53345
TTC14-RI-67728	ID_67728	TTC14	RI	5.5	5.4	5.6	0	0.8879	1	0.2157	0.0131318	3.95853	1.33454	11.7419
TNFRSF10C-AT-83064	ID_83064	TNFRSF10C	AT	8	NA	NA	0	0.8862	0.9726	0.2542	0.0132178	0.352076	0.15418	0.803979
TNFRSF10C-AT-83065	ID_83065	TNFRSF10C	AT	4.3	NA	NA	0	0.8862	0.9726	0.2542	0.0132179	2.84029	1.24381	6.48589
CSNK1E-AP-62230	ID_62230	CSNK1E	AP	1	NA	NA	0	0.7707	0.9462	0.1643	0.0132345	5.04836	1.40236	18.1735
PMEPA1-AP-59948	ID_59948	PMEPA1	AP	1	NA	NA	0	0.9155	0.6001	0.0969	0.0132423	12.8206	1.70343	96.4922
GKAP1-ES-86693	ID_86693	GKAP1	ES	11	10	12	0	0.7948	0.8609	0.1557	0.0133198	0.144228	0.0311263	0.668305
RRBP1-ES-58743	ID_58743	RRBP1	ES	2	1	3.1	0	0.9603	1	0.1176	0.0133749	8.52431	1.56047	46.5652
C16orf46-AT-37751	ID_37751	C16orf46	AT	5	NA	NA	0	0.9897	0.6055	0.1102	0.0133782	0.103229	0.0170752	0.624076
C16orf46-AT-37750	ID_37750	C16orf46	AT	4.2	NA	NA	0	0.9897	0.6055	0.1102	0.0133787	9.68712	1.60235	58.5642
MCF2L-AP-26317	ID_26317	MCF2L	AP	8	NA	NA	0	0.8345	1	0.1831	0.0133799	5.83673	1.44234	23.6196
YLPM1-ES-28429	ID_28429	YLPM1	ES	5	4.2	6	0	0.9983	0.7505	0.0712	0.0133917	0.0707827	0.00867978	0.577225
ALG2-ES-87057	ID_87057	ALG2	ES	2	1	3	0	0.8914	0.8838	0.1623	0.0134163	4.93941	1.39252	17.5207
MBD1-RI-45508	ID_45508	MBD1	RI	18.2:18.3	18.1	18.4	0	1	0.7266	0.1435	0.0134685	6.10324	1.45378	25.6226
DNASE1-AA-33609	ID_33609	DNASE1	AA	9.1:9.2	8	9.3	0	0.7879	0.5877	0.0869	0.0134923	0.0615848	0.00674695	0.562134
MRPL55-RI-10079	ID_10079	MRPL55	RI	2.3:2.4	2.2	2.5	0	1	0.8734	0.1307	0.0135281	9.14945	1.579	53.016
STAG2-AP-90031	ID_90031	STAG2	AP	2	NA	NA	0	0.9845	0.5907	0.0916	0.01358	0.0298529	0.00183648	0.485274
IFNLR1-AT-1094	ID_1094	IFNLR1	AT	8.2	NA	NA	0	1	0.7404	0.1395	0.0135832	0.172151	0.0425729	0.696126
POP5-ES-24773	ID_24773	POP5	ES	3	2	4	0	1	0.5514	0.053	0.0136428	0.0128962	0.000406433	0.409197
DBNDD2-AD-59542	ID_59542	DBNDD2	AD	1.3:1.4	1.2	3.3	0	0.8017	0.5897	0.1189	0.0136897	0.140359	0.0294631	0.668653
NFIC-ES-46681	ID_46681	NFIC	ES	10	9	11	0	0.8931	1	0.1424	0.013744	0.154417	0.0349399	0.682448
CDK2-AD-22323	ID_22323	CDK2	AD	1.2:1.3	1.1	2.1	0	0.8034	0.6387	0.1206	0.0137643	54.0701	2.26014	1293.54
FAM193A-ES-68579	ID_68579	FAM193A	ES	22	21	23	0	0.9448	1	0.1227	0.0137676	4.41723	1.35463	14.4039
CEP76-AT-44706	ID_44706	CEP76	AT	9.2	NA	NA	0	0.9879	0.9764	0.1247	0.0138264	4.82096	1.37798	16.8665
ATP13A2-AD-842	ID_842	ATP13A2	AD	5.2	5.1	6	0	0.7724	0.8983	0.1198	0.0138616	0.0702044	0.00846318	0.582364
TSC22D3-AP-89837	ID_89837	TSC22D3	AP	5	NA	NA	0	0.9724	0.8104	0.1216	0.0138819	0.0902805	0.0132918	0.613202
AKAP17A-AD-88393	ID_88393	AKAP17A	AD	4.2:4.3	4.1	5	0	0.9328	1	0.1155	0.0139087	8.12134	1.53032	43.0996
KIF20B-AT-12498	ID_12498	KIF20B	AT	34	NA	NA	0	0.9966	0.9409	0.1564	0.0139588	0.23411	0.0735651	0.745018
KIF20B-AT-12497	ID_12497	KIF20B	AT	30	NA	NA	0	0.9966	0.9409	0.1564	0.0139594	4.27146	1.34224	13.5933
NDUFA3-AT-51774	ID_51774	NDUFA3	AT	5.2	NA	NA	0	1	0.7972	0.1915	0.0139874	0.238105	0.0758108	0.747834
GDAP2-AT-4377	ID_4377	GDAP2	AT	14	NA	NA	0	1	0.9185	0.1159	0.0140122	0.100498	0.0160751	0.628287
GDAP2-AT-4378	ID_4378	GDAP2	AT	13.2	NA	NA	0	1	0.9185	0.1159	0.0140127	9.95031	1.59161	62.2067
PROM2-AA-54496	ID_54496	PROM2	AA	24.1:24.2	23	24.3	0	0.9931	0.6016	0.0567	0.0140285	3690.71	5.26093	2.58916e+06
EPB41L2-ES-77556	ID_77556	EPB41L2	ES	17:18:20.1:20.2	14	21	0	0.8862	0.7728	0.0461	0.0140653	0.0695928	0.00829357	0.583966
ZNF568-AT-49431	ID_49431	ZNF568	AT	10	NA	NA	0	0.9966	0.8802	0.1496	0.0140717	4.99414	1.38337	18.0295
PDSS2-AT-77129	ID_77129	PDSS2	AT	9	NA	NA	0	1	0.6267	0.1126	0.014084	10.2774	1.59984	66.0221
PDSS2-AT-77130	ID_77130	PDSS2	AT	4	NA	NA	0	1	0.6267	0.1126	0.0140846	0.0973019	0.0151466	0.62507
PANK2-AD-58614	ID_58614	PANK2	AD	3.2	3.1	4	0	0.9603	0.6993	0.1124	0.0141015	0.101885	0.0164483	0.6311
STRA6-AT-31685	ID_31685	STRA6	AT	23	NA	NA	0	0.9948	0.5383	0.0454	0.0141582	0.0258881	0.00139724	0.479654
STRA6-AT-31687	ID_31687	STRA6	AT	11.4	NA	NA	0	0.9948	0.5383	0.0454	0.0141611	38.6254	2.08463	715.678
ZNF706-AA-84745	ID_84745	ZNF706	AA	3.2:3.3	2	3.4	0	0.7517	1	0.2923	0.0142414	0.355527	0.155504	0.812838
ADAM15-ES-7907	ID_7907	ADAM15	ES	21.2	20	23	0	0.9966	0.5711	0.0819	0.0143063	16.3865	1.74867	153.555
CREBRF-AT-74575	ID_74575	CREBRF	AT	10	NA	NA	0	1	0.8066	0.0625	0.0143484	0.0636742	0.00702319	0.577288
CREBRF-AT-74576	ID_74576	CREBRF	AT	4.2	NA	NA	0	1	0.8066	0.0625	0.0143489	15.7048	1.73221	142.385
PIGQ-RI-32906	ID_32906	PIGQ	RI	6.2	6.1	6.3	0	0.9276	1	0.1001	0.0144061	7.4811	1.49259	37.4964
ZNF175-AT-51359	ID_51359	ZNF175	AT	5.2	NA	NA	0	0.7914	0.6825	0.0802	0.0145145	0.07631	0.00969545	0.600613
FAM115C-AT-82122	ID_82122	FAM115C	AT	11.2	NA	NA	0	1	0.5915	0.1204	0.0145658	0.110621	0.0189117	0.647062
FAM115C-AT-82123	ID_82123	FAM115C	AT	12	NA	NA	0	1	0.5915	0.1204	0.014566	9.03974	1.54544	52.8762
CHMP2A-AP-52481	ID_52481	CHMP2A	AP	1	NA	NA	0	1	0.6325	0.0896	0.0147391	0.0825113	0.0111105	0.612764
TTC39C-AP-44849	ID_44849	TTC39C	AP	2	NA	NA	0	0.8828	0.8514	0.2036	0.0148137	0.277412	0.0989095	0.778057
NFX1-AT-86100	ID_86100	NFX1	AT	16	NA	NA	0	1	0.6689	0.0985	0.0149657	12.421	1.63233	94.517
ARFRP1-AP-60152	ID_60152	ARFRP1	AP	1	NA	NA	0	0.869	0.6153	0.1036	0.0150819	0.105311	0.0171461	0.646822
ZNF266-RI-47344	ID_47344	ZNF266	RI	6.3	6.2	6.4	0	0.8069	0.9672	0.2418	0.0151054	2.95977	1.23348	7.10207
HNRNPC-ES-26552	ID_26552	HNRNPC	ES	2.4:2.5:2.6	1	3.2	0	0.9897	0.8729	0.1239	0.0151266	5.70726	1.40007	23.2652
PQLC1-ES-46266	ID_46266	PQLC1	ES	4.1:4.2	2	5	0	0.9534	0.9701	0.2058	0.0152632	3.05254	1.23913	7.51983
NADK-AP-226	ID_226	NADK	AP	8	NA	NA	0	0.7741	0.7751	0.1345	0.0152823	6.02449	1.41164	25.7109
TUBGCP2-ES-13534	ID_13534	TUBGCP2	ES	7	6	8	0	0.9138	1	0.0916	0.0153689	4.98849	1.35992	18.2989
BRD8-ES-73507	ID_73507	BRD8	ES	22	21	23	0	1	0.8913	0.1136	0.0153775	11.4924	1.59505	82.8038
UBXN11-ES-1259	ID_1259	UBXN11	ES	4:5:7:8:9	2	10	0	0.9241	1	0.1116	0.0153855	0.133775	0.0262876	0.680767
STAMBPL1-AT-12472	ID_12472	STAMBPL1	AT	12	NA	NA	0	0.8724	0.5733	0.0808	0.0154253	11.9447	1.60537	88.8747
STAMBPL1-AT-12471	ID_12471	STAMBPL1	AT	11	NA	NA	0	0.8724	0.5733	0.0808	0.0154303	0.0837254	0.0112523	0.622981
JAG2-ES-29601	ID_29601	JAG2	ES	10	9	11	0	0.8345	0.7818	0.1239	0.0155615	0.127506	0.024033	0.676474
RBBP8-AP-44786	ID_44786	RBBP8	AP	3	NA	NA	0	0.7586	0.5257	0.0609	0.0155757	37.9867	1.99343	723.871
CEP63-ES-66880	ID_66880	CEP63	ES	0.678472	15	18	0	0.9621	1	0.1252	0.0157533	0.1009	0.0156794	0.649311
COPS8-ES-58099	ID_58099	COPS8	ES	2	1	3	0	0.9397	0.697	0.055	0.0157908	0.000835798	2.65e-06	0.26387
SH3BP2-AP-68594	ID_68594	SH3BP2	AP	4	NA	NA	0	0.769	1	0.1921	0.0158995	0.21846	0.0634423	0.752256
APOBEC3G-AP-62278	ID_62278	APOBEC3G	AP	1	NA	NA	0	0.8655	0.8097	0.1279	0.0159028	0.144502	0.0299884	0.696297
APOBEC3G-AP-62277	ID_62277	APOBEC3G	AP	2	NA	NA	0	0.8655	0.8097	0.1279	0.0159074	6.91979	1.43605	33.3439
PUF60-ES-85503	ID_85503	PUF60	ES	6	5	7	0	1	0.859	0.0941	0.01593	12.0601	1.59264	91.3244
FAM92A1-AP-84515	ID_84515	FAM92A1	AP	6	NA	NA	0	0.9121	1	0.2076	0.0159951	0.235311	0.0725129	0.763605
ATXN2L-AA-35847	ID_35847	ATXN2L	AA	22.4:22.5:22.6	22.1	22.7	1	0.9138	0.8053	0.1333	0.0159972	0.112069	0.018886	0.665015
MRPL28-AD-32871	ID_32871	MRPL28	AD	1.2	1.1	2	0	0.9552	0.8645	0.0773	0.0160016	0.0196219	0.000801024	0.48066
ELF5-AT-14952	ID_14952	ELF5	AT	8	NA	NA	0	0.7569	1	0.2576	0.0160054	0.273765	0.0954089	0.785538
ELF5-AT-14951	ID_14951	ELF5	AT	4.2	NA	NA	0	0.7569	1	0.2576	0.0160054	3.65274	1.27301	10.481
CENPM-AP-62467	ID_62467	CENPM	AP	1	NA	NA	0	0.9638	1	0.216	0.0160425	4.801	1.33893	17.2149
MXRA7-AP-43610	ID_43610	MXRA7	AP	3.1	NA	NA	0	0.9379	0.9617	0.1492	0.0160938	3.75641	1.27852	11.0367
RFWD2-ES-9054	ID_9054	RFWD2	ES	9	8	10	0	0.9034	0.6271	0.1105	0.0162768	11.0874	1.55779	78.9128
ZKSCAN7-AT-64365	ID_64365	ZKSCAN7	AT	7	NA	NA	0	0.931	0.9998	0.2924	0.0162846	2.42409	1.17714	4.99192
TRAPPC6A-AD-50413	ID_50413	TRAPPC6A	AD	1.2	1.1	2	0	0.9414	0.9004	0.1398	0.0162847	6.1297	1.39649	26.9055
ZKSCAN7-AT-64364	ID_64364	ZKSCAN7	AT	6.3	NA	NA	0	0.931	0.9998	0.2924	0.0162868	0.412534	0.200328	0.849529
MAX-AA-27947	ID_27947	MAX	AA	5.5:5.6:5.7	5.1	5.8	0	0.9759	0.5316	0.0332	0.016335	467.582	3.09553	70628.6
MCCC1-AP-67770	ID_67770	MCCC1	AP	1	NA	NA	0	0.8914	1	0.2292	0.0163902	2.65814	1.19636	5.90599
TIA1-AT-53868	ID_53868	TIA1	AT	15	NA	NA	0	1	0.5147	0.0704	0.0164324	0.0464775	0.00378849	0.570189
STRA13-ES-44266	ID_44266	STRA13	ES	3.1	2	4.1	0	0.9931	0.8666	0.1302	0.0164377	0.144284	0.0296704	0.701643
SF3B1-RI-56678	ID_56678	SF3B1	RI	4.2	4.1	4.3	0	0.9759	0.9788	0.1849	0.016511	6.25792	1.39741	28.0243
ICAM3-RI-47503	ID_47503	ICAM3	RI	3.2	3.1	3.3	0	0.9259	0.9676	0.2543	0.0165478	2.8909	1.21338	6.88762
ERCC1-AP-50438	ID_50438	ERCC1	AP	3.1	NA	NA	0	0.9948	0.9474	0.1789	0.0165479	4.96205	1.33888	18.3899
ATXN2L-AA-35861	ID_35861	ATXN2L	AA	11.1	10	11.2	0	0.9741	0.5063	0.0525	0.016587	79.4906	2.21645	2850.85
TPX2-ES-58903	ID_58903	TPX2	ES	11	10	12	0	0.7879	1	0.074	0.0166467	10.769	1.53916	75.3469
PTPRS-ES-46844	ID_46844	PTPRS	ES	15:16:18:19	14	20	0	0.9466	0.5445	0.0529	0.0167369	0.0374611	0.00254104	0.552269
GRK4-AT-68625	ID_68625	GRK4	AT	2	NA	NA	0	1	0.8994	0.205	0.0167964	3.45575	1.25058	9.54935
GRK4-AT-68624	ID_68624	GRK4	AT	17	NA	NA	0	1	0.8994	0.205	0.0167997	0.289384	0.104723	0.799662
MRPL23-AT-13893	ID_13893	MRPL23	AT	8	NA	NA	0	0.9897	0.8587	0.0722	0.0169194	16.2665	1.64933	160.428
SLC2A8-ES-87631	ID_87631	SLC2A8	ES	0.0854167	1	4	0	0.8741	0.8125	0.1816	0.0169607	0.23502	0.0715883	0.77156
TMEM138-AT-16186	ID_16186	TMEM138	AT	4	NA	NA	0	1	0.5837	0.0724	0.0169953	0.0757752	0.00910824	0.630406
TMEM138-AT-16187	ID_16187	TMEM138	AT	3.5	NA	NA	0	1	0.5837	0.0724	0.0169953	13.1969	1.58628	109.791
TRIM73-AT-80116	ID_80116	TRIM73	AT	7.3	NA	NA	0	0.9966	1	0.1912	0.0170909	0.214534	0.0605438	0.760192
TRIM73-AT-80115	ID_80115	TRIM73	AT	9	NA	NA	0	0.9966	1	0.1912	0.0170916	4.6612	1.31544	16.5167
DISC1-AT-10280	ID_10280	DISC1	AT	17	NA	NA	0	0.9983	0.9908	0.1376	0.0171275	0.240431	0.0744859	0.776081
C15orf57-AT-29993	ID_29993	C15orf57	AT	4.3	NA	NA	0	1	0.7824	0.1194	0.0172825	0.16456	0.0372503	0.726973
RAD51C-AT-42712	ID_42712	RAD51C	AT	2.2	NA	NA	0	0.9983	0.859	0.1401	0.0172965	0.154899	0.0333531	0.719381
TMEM33-RI-69133	ID_69133	TMEM33	RI	8.2	8.1	8.3	0	1	0.78	0.1886	0.0172985	0.295834	0.108519	0.806478
FAM195A-ES-32927	ID_32927	FAM195A	ES	3	2	4	0	0.9879	0.8196	0.1408	0.0173407	0.142663	0.028688	0.709452
SAR1B-ES-73418	ID_73418	SAR1B	ES	6	5.2	8	0	0.9879	1	0.1771	0.0174316	3.14832	1.22312	8.10381
AASDH-ES-69344	ID_69344	AASDH	ES	12	11.1	13	0	0.7759	0.8268	0.121	0.0174973	0.118729	0.0204731	0.688537
PSIP1-AA-85921	ID_85921	PSIP1	AA	11.1	10	11.2	0	0.9	1	0.1477	0.0177132	3.9628	1.26995	12.3657
NABP2-RI-22409	ID_22409	NABP2	RI	1.2:1.3	1.1	1.4	0	0.9483	0.9738	0.1465	0.0177215	5.18591	1.33051	20.213
C19orf60-ES-48491	ID_48491	C19orf60	ES	3.2	2	4	0	0.8948	0.9046	0.175	0.0177377	0.262036	0.0866096	0.792789
DNAJB1-AP-47990	ID_47990	DNAJB1	AP	3	NA	NA	0	0.9966	0.6257	0.0394	0.0178617	0.0310219	0.00175182	0.549347
DNAJB1-AP-47991	ID_47991	DNAJB1	AP	1	NA	NA	0	0.9966	0.6257	0.0394	0.0178718	32.23	1.81983	570.808
TACC2-ES-13343	ID_13343	TACC2	ES	14	13	15.1	0	0.781	0.6512	0.103	0.0179371	11.9046	1.53091	92.5717
APLP2-ES-19479	ID_19479	APLP2	ES	9	8	10	0	0.9948	0.9668	0.1491	0.0179433	5.4831	1.33977	22.44
COX6C-AP-84675	ID_84675	COX6C	AP	2.1	NA	NA	0	1	0.7544	0.0909	0.017997	8.5927	1.44612	51.057
REPIN1-ES-82240	ID_82240	REPIN1	ES	4.1:4.2	3.2	5.2	0	0.8431	0.8866	0.172	0.0179989	4.30048	1.28422	14.401
SNRNP40-ES-1459	ID_1459	SNRNP40	ES	10	9	11	0	0.9914	0.7442	0.0745	0.018001	8.63609	1.44728	51.5327
ZNF175-AT-51361	ID_51361	ZNF175	AT	2.2	NA	NA	0	0.7914	0.6825	0.0652	0.0180772	13.4548	1.55938	116.092
IRF3-ES-50994	ID_50994	IRF3	ES	5.1:6.1	4	6.2	0	0.981	0.5295	0.0944	0.018137	0.116052	0.0194437	0.692674
APIP-AT-14965	ID_14965	APIP	AT	8.2	NA	NA	0	0.9534	0.5558	0.0421	0.0182184	0.0228693	0.000993769	0.526283
APIP-AT-14967	ID_14967	APIP	AT	11	NA	NA	0	0.9534	0.5558	0.0421	0.0182239	43.7221	1.8998	1006.22
PKMYT1-AA-33330	ID_33330	PKMYT1	AA	9.1:9.2	8	9.3	0	0.9828	0.9039	0.1571	0.0182451	0.150288	0.0311559	0.724949
MXRA7-AP-43608	ID_43608	MXRA7	AP	1	NA	NA	0	0.9379	0.9617	0.1547	0.0183165	0.284153	0.0999005	0.808231
STARD4-AT-72962	ID_72962	STARD4	AT	7	NA	NA	0	1	0.6418	0.0854	0.0183281	0.0889944	0.0119239	0.664214
STARD4-AT-72961	ID_72961	STARD4	AT	6.3	NA	NA	0	1	0.6418	0.0854	0.018331	11.2362	1.50545	83.8633
S100A16-AP-7723	ID_7723	S100A16	AP	1	NA	NA	0	0.9603	0.8146	0.0586	0.0183556	0.0262407	0.00127361	0.540649
FAM173A-RI-32963	ID_32963	FAM173A	RI	4.2	4.1	4.3	0	0.9948	0.9188	0.0936	0.0183767	8.04343	1.42174	45.5052
ST7-ES-81563	ID_81563	ST7	ES	10	9	11.1	0	0.8259	1	0.2222	0.0184547	3.54732	1.23739	10.1693
ICAM2-AP-43038	ID_43038	ICAM2	AP	3.1	NA	NA	0	0.7759	0.8449	0.1231	0.0184564	7.2586	1.39575	37.7483
ICAM2-AP-43039	ID_43039	ICAM2	AP	1.1	NA	NA	0	0.7759	0.8449	0.1231	0.0184592	0.137772	0.0264918	0.716493
APOBEC3B-RI-62268	ID_62268	APOBEC3B	RI	7.2	7.1	7.3	0	0.8707	0.6254	0.07	0.0184747	28.608	1.75716	465.761
SEPT6-AT-89964	ID_89964	SEPT6	AT	13.3	NA	NA	0	1	0.6935	0.1087	0.0185193	0.121177	0.0209225	0.701823
YIF1A-RI-17007	ID_17007	YIF1A	RI	8.3	8.2	8.4	0	0.9983	0.5375	0.0277	0.0186172	52.8794	1.94052	1440.97
SLC35D1-AT-3347	ID_3347	SLC35D1	AT	13	NA	NA	0	1	0.9874	0.1473	0.0186663	0.273825	0.0930542	0.80577
SLC35D1-AT-3346	ID_3346	SLC35D1	AT	12	NA	NA	0	1	0.9874	0.1473	0.0186681	3.65192	1.24103	10.7463
ASL-AP-79864	ID_79864	ASL	AP	2.1	NA	NA	0	0.8397	0.944	0.1836	0.0186865	0.20962	0.0570039	0.770834
ASL-AP-79865	ID_79865	ASL	AP	1	NA	NA	0	0.8397	0.944	0.1836	0.0186895	4.77033	1.29724	17.5418
CYB561A3-RI-16165	ID_16165	CYB561A3	RI	6.5	6.4	6.6	0	0.8379	1	0.1428	0.0187951	4.39144	1.27808	15.0889
PCNXL4-ES-27768	ID_27768	PCNXL4	ES	11	10	12	0	0.8741	0.5477	0.0602	0.0188102	26.6291	1.72267	411.634
SULT1A3-AP-94134	ID_94134	SULT1A3	AP	2.1	NA	NA	0	0.9983	0.7398	0.1409	0.0188537	5.33737	1.31919	21.5948
SAP30BP-ES-43482	ID_43482	SAP30BP	ES	4	3	6	0	0.9966	0.844	0.0474	0.0188809	0.0186064	0.000668666	0.517747
COX10-AT-39334	ID_39334	COX10	AT	7	NA	NA	0	1	0.6509	0.099	0.0189866	17.6359	1.60326	193.995
COX10-AT-39335	ID_39335	COX10	AT	3.2	NA	NA	0	1	0.6509	0.099	0.0189869	0.0567029	0.0051548	0.623733
RPL19-ES-40632	ID_40632	RPL19	ES	1.2:1.3:2.1	1.1	2.2	0	0.9276	0.9489	0.1963	0.0190835	0.302303	0.11117	0.822046
MYL6-ES-22384	ID_22384	MYL6	ES	2.1	1.4	3.1	0	0.9828	0.9468	0.1543	0.0192292	0.193644	0.0489863	0.765479
ANAPC11-ES-44218	ID_44218	ANAPC11	ES	6	3.2	7.2	0	0.9983	0.6822	0.0916	0.0194269	15.9397	1.56352	162.503
PHF21A-ME-157593	ID_157593	PHF21A	ME	16|17	15	18	0	0.9586	0.5325	0.0495	0.0194595	30.5493	1.73529	537.811
ARMC10-ES-81160	ID_81160	ARMC10	ES	8	6	9	0	0.9983	0.5364	0.0659	0.0194828	0.0385129	0.00250598	0.591884
GUSB-ES-79855	ID_79855	GUSB	ES	6	5.1	7	0	0.9914	0.7432	0.1061	0.0195853	0.109843	0.0171924	0.701795
METTL23-AD-43656	ID_43656	METTL23	AD	1.2:1.3	1.1	2	0	0.7707	0.8543	0.2072	0.0195922	0.253776	0.0802334	0.802686
GNE-RI-86340	ID_86340	GNE	RI	13.2	13.1	13.3	0	1	0.6617	0.0742	0.0197141	0.0875393	0.0112996	0.678174
ESRP1-ES-97999	ID_97999	ESRP1	ES	15	13	16	1	0.8155	0.73	0.1384	0.0198052	0.148234	0.0297554	0.738465
TPD52-AP-84268	ID_84268	TPD52	AP	4	NA	NA	0	0.9328	0.7479	0.0579	0.0199206	11.9347	1.47969	96.2606
FAM72A-AT-9578	ID_9578	FAM72A	AT	6	NA	NA	0	0.9983	0.9428	0.1926	0.0199612	6.31237	1.33732	29.7954
ZNF880-AT-51447	ID_51447	ZNF880	AT	3.4	NA	NA	0	0.9983	0.8551	0.1631	0.0199864	0.179392	0.0421887	0.762799
CRELD1-ES-63289	ID_63289	CRELD1	ES	10	9	11	0	0.9983	1	0.1191	0.0199934	4.71396	1.27669	17.4056
IFI44-AT-3554	ID_3554	IFI44	AT	7.2	NA	NA	0	0.9862	0.5375	0.0516	0.0201676	40.9217	1.78665	937.274
IFI44-AT-3555	ID_3555	IFI44	AT	9	NA	NA	0	0.9862	0.5375	0.0516	0.0201779	0.0244419	0.00106705	0.559868
PYCR1-ES-44244	ID_44244	PYCR1	ES	7	6	8.1	0	0.9914	0.562	0.0473	0.0202431	0.00446094	4.63e-05	0.4302
CORO7-AD-33673	ID_33673	CORO7	AD	6.2	6.1	7.1	0	0.8345	0.8556	0.0624	0.020247	4072.82	3.65171	4.54249e+06
PLEKHG2-AP-49821	ID_49821	PLEKHG2	AP	1	NA	NA	0	0.8586	0.79	0.1719	0.0202877	0.220911	0.061722	0.79067
PLEKHG2-AP-49822	ID_49822	PLEKHG2	AP	2	NA	NA	0	0.8586	0.79	0.1719	0.0202879	4.52669	1.26475	16.2016
SENP6-AT-76794	ID_76794	SENP6	AT	18.2	NA	NA	0	1	0.5413	0.0849	0.020343	13.0951	1.49055	115.047
SENP6-AT-76793	ID_76793	SENP6	AT	26	NA	NA	0	1	0.5413	0.0849	0.0203494	0.0763732	0.00869303	0.670981
C8orf34-AT-84098	ID_84098	C8orf34	AT	16	NA	NA	0	0.9	1	0.2764	0.0203638	2.58291	1.15849	5.75875
FAM208A-AA-65355	ID_65355	FAM208A	AA	18.1	17	18.2	0	0.8552	0.7326	0.1305	0.020415	8.50048	1.39244	51.8934
C12orf52-AA-24620	ID_24620	C12orf52	AA	2.1	1	2.2	0	0.8586	0.7329	0.0799	0.0204327	0.0917072	0.0121671	0.691223
SVEP1-AT-87187	ID_87187	SVEP1	AT	49	NA	NA	0	0.9086	0.8703	0.1778	0.0204516	0.28483	0.0984936	0.823691
FGFR2-AT-13300	ID_13300	FGFR2	AT	28.2	NA	NA	0	0.9948	0.7454	0.1087	0.020475	0.15562	0.0322688	0.750493
C9orf69-RI-88148	ID_88148	C9orf69	RI	2.2	2.1	2.3	0	1	0.5518	0.036	0.0204761	35700.2	5.03946	2.52904e+08
DMKN-ES-49178	ID_49178	DMKN	ES	11	7	12	0	0.8948	1	0.0967	0.0205495	0.0184055	0.00062622	0.540966
DMKN-AA-49149	ID_49149	DMKN	AA	18.3:18.4	18.1	18.5	0	0.8948	1	0.153	0.0205673	0.124744	0.0214266	0.726252
WASH4P-AA-32782	ID_32782	WASH4P	AA	3.1	1	3.2	0	0.9414	1	0.1682	0.0207059	4.95749	1.27702	19.2454
FAM122B-ES-90158	ID_90158	FAM122B	ES	3	2	4	0	0.7828	1	0.1515	0.0207859	5.48665	1.29578	23.2319
MORF4L2-AP-89764	ID_89764	MORF4L2	AP	2	NA	NA	0	0.9879	1	0.1097	0.0209494	13.7386	1.48584	127.032
KIAA1522-AP-1632	ID_1632	KIAA1522	AP	1	NA	NA	0	0.7672	1	0.1733	0.0209531	0.179564	0.0417954	0.771458
MBTD1-AT-42519	ID_42519	MBTD1	AT	17	NA	NA	0	1	0.8571	0.107	0.0209576	0.176786	0.0406055	0.769683
MBTD1-AT-42518	ID_42518	MBTD1	AT	16.4	NA	NA	0	1	0.8571	0.107	0.020969	5.65588	1.29904	24.625
TOR2A-RI-87659	ID_87659	TOR2A	RI	3.2	3.1	3.3	0	0.9793	1	0.0869	0.0209975	12.7735	1.46838	111.117
SLC1A5-AP-50594	ID_50594	SLC1A5	AP	1	NA	NA	0	0.9948	0.7462	0.0745	0.0210224	0.108161	0.0163551	0.715305
PARP6-ES-31527	ID_31527	PARP6	ES	18.2	17	19	0	0.9879	0.6977	0.129	0.0210438	7.6998	1.35961	43.6057
COX6C-AP-84673	ID_84673	COX6C	AP	1	NA	NA	0	1	0.8156	0.0933	0.0210732	0.123742	0.020962	0.730465
TCEA2-AP-60186	ID_60186	TCEA2	AP	1	NA	NA	0	0.9724	0.879	0.1508	0.0211171	3.65334	1.21454	10.9893
TCEA2-AP-60187	ID_60187	TCEA2	AP	3	NA	NA	0	0.9724	0.879	0.1508	0.0211204	0.273729	0.0909998	0.823381
HPS1-AA-12763	ID_12763	HPS1	AA	2.1	1	2.2	0	0.8241	0.7391	0.0874	0.0211449	0.0968757	0.0133146	0.704858
GPR56-AP-36576	ID_36576	GPR56	AP	1	NA	NA	0	0.9276	0.9354	0.1773	0.0211543	4.81612	1.26546	18.3293
ODF3B-AA-62858	ID_62858	ODF3B	AA	4.1	3.2	4.2	0	0.8621	0.8444	0.2033	0.0211709	3.52945	1.20773	10.3144
CHCHD6-AA-66603	ID_66603	CHCHD6	AA	6.1	4	6.2	0	0.9603	0.5505	0.0678	0.0211987	33.0228	1.68667	646.544
NEK11-AT-66783	ID_66783	NEK11	AT	21	NA	NA	0	1	0.5778	0.0697	0.021214	58.6066	1.83693	1869.82
LETMD1-ES-21763	ID_21763	LETMD1	ES	3.2	2	7	0	0.75	0.8521	0.1438	0.0212183	0.132563	0.0237635	0.739493
PPHLN1-ES-21221	ID_21221	PPHLN1	ES	10	9	11	0	0.9793	0.6641	0.1055	0.0212308	0.125496	0.0214687	0.733592
SLC37A3-ES-81985	ID_81985	SLC37A3	ES	0.50919	11	15	0	0.9293	0.6427	0.0754	0.0212521	105.659	2.00364	5571.76
KIAA1217-ES-11002	ID_11002	KIAA1217	ES	0.975	22	25.1	0	0.9983	0.9032	0.1199	0.0213338	0.136116	0.0249179	0.743544
PATZ1-AA-61846	ID_61846	PATZ1	AA	5.1	4	5.2	0	0.8293	0.9497	0.1367	0.021388	0.118242	0.0191864	0.728705
STRADA-AA-42965	ID_42965	STRADA	AA	12.1	11.2	12.2	0	0.9759	0.5024	0.0645	0.0214666	35.4568	1.69404	742.122
RBBP8-AP-44784	ID_44784	RBBP8	AP	1	NA	NA	0	0.7586	0.7762	0.1468	0.0214921	0.162465	0.0345124	0.764792
PPIE-ES-1903	ID_1903	PPIE	ES	11	9.1	12	0	0.9655	0.8289	0.1527	0.0214976	0.19944	0.0504562	0.788331
ITGB3BP-ES-3266	ID_3266	ITGB3BP	ES	9	8	10	0	0.9793	1	0.1959	0.0215384	3.3804	1.19644	9.55089
PCDH11X-AT-89582	ID_89582	PCDH11X	AT	14.2	NA	NA	0	0.8759	0.8293	0.1506	0.021601	4.20819	1.23494	14.3399
PHACTR1-AT-75366	ID_75366	PHACTR1	AT	13.3	NA	NA	0	0.9017	0.8906	0.126	0.0216011	5.91646	1.29829	26.962
CCDC90B-AD-18069	ID_18069	CCDC90B	AD	1.4:1.5	1.3	2	0	0.8276	0.9756	0.1481	0.0216538	0.126179	0.0215615	0.738404
PPP2R5C-AT-29315	ID_29315	PPP2R5C	AT	9	NA	NA	0	1	0.6241	0.0822	0.021726	0.011472	0.000252717	0.520771
ARAP3-ES-73825	ID_73825	ARAP3	ES	32	31	33	0	0.8966	0.7922	0.0905	0.0217348	37.7828	1.6992	840.125
BLOC1S6-AT-30430	ID_30430	BLOC1S6	AT	9	NA	NA	0	1	0.9858	0.1618	0.0218447	0.164041	0.0349898	0.769065
BLOC1S6-AT-30431	ID_30431	BLOC1S6	AT	4.2	NA	NA	0	1	0.9858	0.1618	0.0218457	6.09594	1.30026	28.5792
EVL-AP-29241	ID_29241	EVL	AP	3	NA	NA	0	0.8172	1	0.2855	0.0219626	0.384686	0.169888	0.87106
TRPC4AP-ES-59059	ID_59059	TRPC4AP	ES	9.2	8	10	0	0.8862	0.8723	0.0836	0.0220618	0.139409	0.0258038	0.753179
RBM10-ES-88906	ID_88906	RBM10	ES	4	3	5	0	0.9586	0.8669	0.1129	0.022092	0.171562	0.0379166	0.776271
USP33-ES-3534	ID_3534	USP33	ES	2	1	3	0	0.8414	0.666	0.1677	0.0222041	5.1079	1.26252	20.6654
KIF27-AT-86699	ID_86699	KIF27	AT	12.2	NA	NA	0	0.9931	0.8267	0.1709	0.0222223	0.241699	0.0715543	0.816421
UBE2D2-AP-73616	ID_73616	UBE2D2	AP	2	NA	NA	0	1	0.9938	0.2965	0.0222311	2.3216	1.12778	4.77914
LRTOMT-ES-17550	ID_17550	LRTOMT	ES	2.1:2.2:3	1	5	0	0.9534	0.8599	0.0962	0.0222448	0.101185	0.0141966	0.721184
TANK-ES-55743	ID_55743	TANK	ES	3	2.2	4	0	0.8914	1	0.1767	0.022261	3.5666	1.19878	10.6113
CSNK1E-AP-62228	ID_62228	CSNK1E	AP	7	NA	NA	0	0.7707	0.9462	0.1696	0.0222924	0.231535	0.0660236	0.811961
RPAIN-ES-38692	ID_38692	RPAIN	ES	0.00284838	3	7	0	0.9379	0.554	0.0848	0.0224054	13.5336	1.44634	126.636
GNAS-ES-60003	ID_60003	GNAS	ES	0.00426042	5	8.2	0	0.9966	0.8025	0.1208	0.0224437	0.131946	0.0231833	0.750956
DOCK8-AT-85701	ID_85701	DOCK8	AT	55	NA	NA	0	0.9966	0.9816	0.1187	0.0224582	0.224285	0.062136	0.809573
MVD-ES-38010	ID_38010	MVD	ES	0.127778	1	5	0	0.9241	1	0.2014	0.0225423	3.03717	1.16929	7.88888
CCDC40-AT-44017	ID_44017	CCDC40	AT	23	NA	NA	0	0.9948	1	0.2069	0.0225818	0.336953	0.132291	0.85824
MAP4K1-ES-49669	ID_49669	MAP4K1	ES	31	30	32	0	0.7534	1	0.2177	0.0226197	3.51451	1.19283	10.355
ZMIZ2-AA-79561	ID_79561	ZMIZ2	AA	5.1:5.2	4	5.3	0	0.9379	0.615	0.1046	0.0226384	11.8448	1.41409	99.2144
NUP93-AP-36496	ID_36496	NUP93	AP	1	NA	NA	0	0.7828	0.776	0.0795	0.0226651	0.122896	0.0202554	0.745647
MAST4-AT-72280	ID_72280	MAST4	AT	19.2	NA	NA	0	1	0.6331	0.097	0.0226791	6.45215	1.29804	32.0716
SUMO1-AA-56937	ID_56937	SUMO1	AA	5.1	4	5.2	0	0.9966	0.6596	0.031	0.022688	0.0328823	0.00174316	0.620279
TRIM36-AT-73020	ID_73020	TRIM36	AT	3	NA	NA	0	0.9603	0.7643	0.1266	0.0227609	5.73185	1.27556	25.7565
PALM-ES-46315	ID_46315	PALM	ES	8	7	9	0	0.7914	0.8491	0.2105	0.0228348	0.277653	0.0921124	0.836927
RIBC1-ES-89221	ID_89221	RIBC1	ES	5.1	4	6	0	0.7621	1	0.1883	0.0228903	4.21917	1.22079	14.5818
PDCD2-AT-78498	ID_78498	PDCD2	AT	7	NA	NA	0	1	0.5325	0.0882	0.0229168	0.0697602	0.00703509	0.691744
PCDH11X-AT-89581	ID_89581	PCDH11X	AT	6	NA	NA	0	0.8759	0.8622	0.1555	0.0229605	0.257165	0.07978	0.828954
TRAPPC6A-ES-50411	ID_50411	TRAPPC6A	ES	2	1.1	3	0	0.9672	0.7436	0.1188	0.0229956	9.983	1.37344	72.5625
FTSJ2-ES-78605	ID_78605	FTSJ2	ES	4	2	5	0	0.8776	1	0.1523	0.0230246	3.80122	1.20191	12.0219
PCYT1A-AA-68233	ID_68233	PCYT1A	AA	7.1	6	7.2	0	0.7879	0.5535	0.076	0.0230804	13.2034	1.42547	122.297
MSL1-RI-40845	ID_40845	MSL1	RI	1.2	1.1	1.3	0	0.9845	0.8903	0.1414	0.0230872	7.60972	1.32143	43.8222
PIGO-RI-86233	ID_86233	PIGO	RI	9.2	9.1	9.3	0	0.9966	0.7614	0.1627	0.0231123	4.21833	1.2183	14.6058
RPS24-ES-12295	ID_12295	RPS24	ES	5.1:5.2	4	6	0	1	0.9864	0.2422	0.0232141	0.396667	0.178518	0.881393
PDCD2-AT-78499	ID_78499	PDCD2	AT	3.3	NA	NA	0	1	0.576	0.0865	0.0232559	10.4973	1.37768	79.9839
SULT1A3-RI-94138	ID_94138	SULT1A3	RI	1.2	1.1	1.3	0	0.9672	0.6174	0.0842	0.0232572	11.1165	1.38846	89.0024
PIGP-AP-60541	ID_60541	PIGP	AP	1.1	NA	NA	0	0.9241	1	0.1669	0.0233268	5.4577	1.25925	23.6542
NEK4-ES-65262	ID_65262	NEK4	ES	2.1:2.2	1	3	0	0.8086	0.6003	0.0408	0.0233518	0.025347	0.0010578	0.607364
SLC13A3-AT-59695	ID_59695	SLC13A3	AT	16	NA	NA	0	0.9328	0.9158	0.1985	0.0233887	0.317187	0.117537	0.855963
ANKRD16-ES-10668	ID_10668	ANKRD16	ES	6	5	7.1	0	0.9862	0.6559	0.0947	0.0234099	17.9564	1.47813	218.135
MAN2C1-AA-31865	ID_31865	MAN2C1	AA	19.1	18.2	19.2	0	0.969	0.7347	0.1131	0.0234153	7.4155	1.31133	41.9341
TFG-AD-65836	ID_65836	TFG	AD	1.2	1.1	2	0	0.9	0.5888	0.1201	0.0235632	0.138725	0.0250938	0.766903
FAM219B-ES-31798	ID_31798	FAM219B	ES	3.1:3.2	2	4	0	0.9052	0.6942	0.1093	0.023691	6.97751	1.29625	37.5588
SMPD4-ES-55299	ID_55299	SMPD4	ES	0.466667	10	14	0	0.7759	1	0.1356	0.0237201	4.25706	1.21315	14.9384
OGG1-AT-63159	ID_63159	OGG1	AT	6.4	NA	NA	0	1	0.7214	0.1084	0.0238303	11.1058	1.37641	89.609
OGG1-AT-63158	ID_63158	OGG1	AT	8	NA	NA	0	1	0.7214	0.1084	0.0238341	0.0900486	0.0111602	0.726575
KDM2B-AT-24877	ID_24877	KDM2B	AT	15.2	NA	NA	0	1	0.6459	0.0685	0.0238351	11.3296	1.37996	93.0166
ARL6IP4-AA-25026	ID_25026	ARL6IP4	AA	3.1:3.2	2.2	3.3	0	0.9931	0.5134	0.0737	0.0238353	0.0569039	0.00473633	0.683663
ZNF410-ES-28328	ID_28328	ZNF410	ES	14	13	16	0	0.9966	1	0.1354	0.0238452	3.74575	1.1914	11.7766
CHD2-AT-32561	ID_32561	CHD2	AT	14.2	NA	NA	0	1	0.5899	0.071	0.0238713	20.3931	1.49087	278.949
FAM72A-AT-9577	ID_9577	FAM72A	AT	2	NA	NA	0	0.9983	0.853	0.1769	0.0239192	0.154978	0.0307291	0.781611
FKBP3-ES-27404	ID_27404	FKBP3	ES	3	2	4	0	0.9983	1	0.1476	0.0240822	3.49589	1.17839	10.3712
CCNB1IP1-ES-26422	ID_26422	CCNB1IP1	ES	6	5	8	0	0.9586	1	0.1289	0.02416	3.69495	1.18624	11.5092
RBBP5-AD-9524	ID_9524	RBBP5	AD	13.2	13.1	14	0	0.8086	0.5893	0.1124	0.0241699	0.125927	0.0207861	0.762895
BCS1L-AD-57522	ID_57522	BCS1L	AD	1.3:1.4:1.5:1.6:1.7:1.8	1.2	2	0	0.781	0.8076	0.1712	0.0242161	0.262861	0.0822389	0.840183
C4orf48-AD-68544	ID_68544	C4orf48	AD	1.2	1.1	2	0	0.7897	1	0.2515	0.0242165	2.73773	1.14026	6.57323
ZNF544-AT-52425	ID_52425	ZNF544	AT	10.2	NA	NA	0	0.9983	0.8051	0.1527	0.024321	5.18662	1.23797	21.7299
SDSL-ES-24644	ID_24644	SDSL	ES	2	1	3	0	0.8121	1	0.2247	0.0243225	2.68059	1.1364	6.32311
TMEM126B-ES-18118	ID_18118	TMEM126B	ES	0.127778	1	5.1	0	0.9828	0.7078	0.0798	0.0244711	80.7112	1.76018	3700.94
FBXO4-ES-71891	ID_71891	FBXO4	ES	2	1	4	0	0.9052	0.5689	0.0838	0.0247356	44.0651	1.61833	1199.84
CPNE1-ES-59190	ID_59190	CPNE1	ES	2.1:2.2:3	1.2	5	0	0.9603	1	0.1881	0.0247528	0.269147	0.0855863	0.8464
TMEM134-AD-17237	ID_17237	TMEM134	AD	2.2	2.1	3.2	0	0.9552	0.5272	0.0877	0.0248472	16.4435	1.42497	189.751
PPAN-AT-47460	ID_47460	PPAN	AT	12.2	NA	NA	0	1	0.694	0.1313	0.0249454	7.03864	1.27848	38.7512
PPAN-AT-47461	ID_47461	PPAN	AT	13	NA	NA	0	1	0.694	0.1313	0.0249472	0.142078	0.0258068	0.7822
GNB2L1-ES-190578	ID_190578	GNB2L1	ES	4.1:4.2:5:6:7.2:8.1:8.2	3	9	1	0.9966	0.8799	0.1934	0.0250619	3.46849	1.16848	10.2958
C11orf49-AA-15611	ID_15611	C11orf49	AA	14.3	14.1	14.4	0	0.9828	0.6767	0.0615	0.0250865	0.013208	0.000299673	0.582135
GSK3B-ES-66364	ID_66364	GSK3B	ES	9	8	10	0	0.9603	0.5809	0.0665	0.0253724	0.0126324	0.000273597	0.583259
TRIM36-AT-73021	ID_73021	TRIM36	AT	13	NA	NA	0	0.9603	0.7643	0.1428	0.0254123	0.198827	0.0482282	0.819691
USP15-AT-22828	ID_22828	USP15	AT	7	NA	NA	0	1	0.6094	0.0875	0.025424	0.0507346	0.00371433	0.692991
USP15-AT-22829	ID_22829	USP15	AT	23	NA	NA	0	1	0.6094	0.0875	0.0254278	19.7091	1.44291	269.212
TPM2-ES-98133	ID_98133	TPM2	ES	6	5	7	1	0.9017	0.9634	0.2508	0.0254444	0.352526	0.141264	0.879733
CDC14A-AT-3882	ID_3882	CDC14A	AT	16.2	NA	NA	0	0.9966	0.8074	0.0638	0.0254846	9.38138	1.316	66.8772
RASSF8-AT-20838	ID_20838	RASSF8	AT	9	NA	NA	0	0.9983	0.9921	0.1558	0.0254991	3.20881	1.15362	8.92534
RASSF8-AT-20839	ID_20839	RASSF8	AT	8	NA	NA	0	0.9983	0.9921	0.1558	0.0254992	0.311642	0.112041	0.866837
C19orf54-RI-49967	ID_49967	C19orf54	RI	8.6	8.5	8.7	0	0.9759	0.9711	0.1	0.0255473	19.3234	1.43637	259.957
ENDOV-AT-44054	ID_44054	ENDOV	AT	13	NA	NA	0	1	0.8901	0.19	0.0255784	3.6459	1.1711	11.3505
FAM102B-AT-3940	ID_3940	FAM102B	AT	12	NA	NA	0	1	0.8158	0.1232	0.0255897	4.72259	1.20857	18.454
FAM102B-AT-3941	ID_3941	FAM102B	AT	11	NA	NA	0	1	0.8158	0.1232	0.0255897	0.211748	0.0541889	0.827427
KDM2B-AT-24876	ID_24876	KDM2B	AT	26.4	NA	NA	0	1	0.6562	0.0708	0.0255966	0.0911399	0.0111256	0.746613
LARP6-AT-31442	ID_31442	LARP6	AT	4	NA	NA	0	1	0.8811	0.1773	0.0256306	4.50458	1.20118	16.8928
LARP6-AT-31443	ID_31443	LARP6	AT	2	NA	NA	0	1	0.8811	0.1773	0.0256306	0.221996	0.0591968	0.832518
PRAME-AP-61277	ID_61277	PRAME	AP	2	NA	NA	0	0.8914	0.9067	0.1636	0.025704	0.241449	0.0692699	0.841599
DMKN-ES-49190	ID_49190	DMKN	ES	0.3	6.4	13	0	0.9155	0.6152	0.1103	0.0257195	13.7384	1.37399	137.369
ISY1-ES-66700	ID_66700	ISY1	ES	9	8	10.1	0	0.9362	1	0.1354	0.0257422	3.46083	1.16227	10.3051
FAM104B-AT-89278	ID_89278	FAM104B	AT	4.2	NA	NA	0	0.9983	0.792	0.1383	0.0257948	0.170544	0.0360145	0.807601
FAM104B-AT-89277	ID_89277	FAM104B	AT	5	NA	NA	0	0.9983	0.792	0.1383	0.0257948	5.86358	1.23823	27.7666
DYNC2LI1-AA-53400	ID_53400	DYNC2LI1	AA	8.1	7	8.2	0	0.9397	1	0.1967	0.0258054	2.8941	1.13691	7.36717
MAP2K5-ES-31333	ID_31333	MAP2K5	ES	21	20	22	0	0.7862	0.5375	0.0823	0.0258267	0.0527333	0.00396566	0.701221
WDR78-AT-3327	ID_3327	WDR78	AT	11.2	NA	NA	0	0.9466	0.6976	0.1283	0.0258275	5.62804	1.2317	25.7163
DNMT1-AD-47474	ID_47474	DNMT1	AD	37.2	37.1	38	0	0.9828	0.5921	0.0524	0.0258376	0.00374465	2.75e-05	0.509867
MIER1-RI-3338	ID_3338	MIER1	RI	16.2:16.3	16.1	16.4	0	0.9931	0.9047	0.1597	0.0258446	5.64086	1.23183	25.831
HNRNPF-AP-11322	ID_11322	HNRNPF	AP	2	NA	NA	0	0.9724	0.8853	0.1912	0.0258846	0.22653	0.06135	0.836441
SSR4-AD-90500	ID_90500	SSR4	AD	1.2	1.1	2.2	0	0.9293	0.5783	0.1124	0.0259134	9.84565	1.31613	73.6531
ZNF630-AT-88951	ID_88951	ZNF630	AT	6.2	NA	NA	0	0.9741	0.8596	0.1255	0.0259615	0.200474	0.0487244	0.82484
ZNF630-AT-88952	ID_88952	ZNF630	AT	14	NA	NA	0	0.9741	0.8596	0.1255	0.0259615	4.98818	1.21236	20.5236
MARVELD3-AT-37465	ID_37465	MARVELD3	AT	5	NA	NA	0	0.9931	0.5964	0.1015	0.0259753	0.12204	0.0191596	0.777348
INPP4B-AT-70691	ID_70691	INPP4B	AT	35	NA	NA	0	0.9931	0.8729	0.1753	0.025992	0.268465	0.0843538	0.854417
RNF4-AP-68566	ID_68566	RNF4	AP	4	NA	NA	0	0.8569	1	0.1634	0.0260529	3.07034	1.14318	8.24631
PAK6-AP-29958	ID_29958	PAK6	AP	2	NA	NA	0	0.7931	1	0.0647	0.0260675	64.0414	1.64182	2498.02
FAM92A1-AP-84516	ID_84516	FAM92A1	AP	1	NA	NA	0	0.9121	1	0.2109	0.0261443	3.6382	1.16574	11.3546
HKR1-AT-49481	ID_49481	HKR1	AT	16.2	NA	NA	0	1	0.8972	0.1676	0.0261997	3.59107	1.16345	11.084
MCCC1-AP-67769	ID_67769	MCCC1	AP	2	NA	NA	0	0.8914	1	0.2392	0.0262102	0.407853	0.184972	0.899291
USP21-ES-8566	ID_8566	USP21	ES	2	1	3	0	0.8828	0.8232	0.18	0.0263248	0.231197	0.0635059	0.841687
ABHD14B-AA-65146	ID_65146	ABHD14B	AA	3.1:3.2	2.2	3.3	0	0.9466	0.9092	0.1256	0.0263491	5.65163	1.22578	26.0576
ZNF283-AT-50245	ID_50245	ZNF283	AT	8	NA	NA	0	0.9948	0.8933	0.2914	0.0263493	2.24867	1.09993	4.59712
DIDO1-AT-60091	ID_60091	DIDO1	AT	7.3	NA	NA	0	1	0.8547	0.1594	0.0263777	5.0849	1.21032	21.3632
MYO5C-AT-30645	ID_30645	MYO5C	AT	15.2	NA	NA	0	1	0.5076	0.0703	0.0263936	16.7658	1.39188	201.951
MYO5C-AT-30646	ID_30646	MYO5C	AT	43	NA	NA	0	1	0.5076	0.0703	0.0263961	0.0596484	0.00495198	0.718487
HCST-AA-49312	ID_49312	HCST	AA	4.1	3	4.2	0	0.8966	0.6712	0.1009	0.02641	15.6811	1.38064	178.103
PTPRC-AT-9321	ID_9321	PTPRC	AT	4	NA	NA	0	0.9879	0.5957	0.0833	0.0264863	10.6554	1.31812	86.1362
HKR1-AT-49480	ID_49480	HKR1	AT	17.2	NA	NA	0	1	0.9029	0.1673	0.0264904	0.279303	0.090532	0.861686
TRAPPC1-RI-39078	ID_39078	TRAPPC1	RI	1.2	1.1	1.3	0	1	0.6396	0.0818	0.02662	24.7478	1.45074	422.167
GPBP1L1-ES-2769	ID_2769	GPBP1L1	ES	2	1	3	0	0.7534	0.6435	0.1147	0.0267042	11.3233	1.32342	96.8835
RABEP2-ES-35894	ID_35894	RABEP2	ES	3	2.2	4	0	0.9569	1	0.1752	0.0268146	2.9995	1.13443	7.9309
TMEM25-AA-19013	ID_19013	TMEM25	AA	8.1	7	8.2	0	0.9017	0.5963	0.0753	0.0268237	60.395	1.60106	2278.22
UBALD1-AP-33763	ID_33763	UBALD1	AP	1.1	NA	NA	0	0.9534	0.8887	0.2231	0.0269121	0.310943	0.110491	0.875055
UBALD1-AP-33764	ID_33764	UBALD1	AP	2.1	NA	NA	0	0.9534	0.8887	0.2231	0.0269138	3.21597	1.14277	9.05037
FMO5-AT-7367	ID_7367	FMO5	AT	11	NA	NA	0	0.9776	1	0.2008	0.0269647	2.85408	1.12694	7.22822
CYB561D2-AA-65052	ID_65052	CYB561D2	AA	1.4	1.1	1.5	0	0.9276	1	0.1444	0.0269671	5.43197	1.21266	24.3319
MCFD2-AP-53471	ID_53471	MCFD2	AP	3	NA	NA	0	0.9448	0.5308	0.0831	0.0269814	0.0725481	0.00709538	0.741782
FIP1L1-ES-69313	ID_69313	FIP1L1	ES	11	10	12	0	0.9828	1	0.1088	0.0270691	0.151263	0.0283426	0.807282
MYL6-AA-22381	ID_22381	MYL6	AA	3.1	2.1	3.2	0	0.9672	0.5112	0.0662	0.0270748	0.0405104	0.00236002	0.695373
RAB17-AD-58122	ID_58122	RAB17	AD	2.3	2.2	3	0	0.7879	0.5	0.0569	0.0270772	0.0257247	0.00100186	0.66053
CD46-ES-9652	ID_9652	CD46	ES	13	12	14	0	0.9931	1	0.1535	0.0271265	4.56552	1.18722	17.5569
ZNF169-AT-86926	ID_86926	ZNF169	AT	4.3	NA	NA	0	0.9931	0.7326	0.1222	0.0271355	6.69667	1.23963	36.1764
IL32-RI-33381	ID_33381	IL32	RI	1.7:1.8	1.6	1.9	0	0.85	0.8007	0.1389	0.027244	6.96137	1.24356	38.9694
MKS1-ES-42653	ID_42653	MKS1	ES	0.170139	3	6.2	0	0.9172	0.5888	0.0332	0.027332	174146000000	18.0746	1.68e+21
D2HGDH-ES-58421	ID_58421	D2HGDH	ES	0.339583	6	11.2	0	0.9328	0.5468	0.0813	0.0273801	0.0892458	0.0104289	0.763722
TMEM234-RI-1569	ID_1569	TMEM234	RI	6.2	6.1	6.3	0	0.9241	0.8854	0.1909	0.0276957	3.51341	1.14786	10.754
RNF7-ES-67074	ID_67074	RNF7	ES	0.0854167	1.2	4	0	0.8621	0.9424	0.2146	0.0278363	3.18658	1.13457	8.94991
ZNF616-AT-51408	ID_51408	ZNF616	AT	5	NA	NA	0	1	0.9964	0.204	0.0278402	0.311719	0.110323	0.880769
ZNF616-AT-51409	ID_51409	ZNF616	AT	4.3	NA	NA	0	1	0.9964	0.204	0.0278417	3.20798	1.13536	9.06421
PPP4C-ES-94130	ID_94130	PPP4C	ES	5.1:5.2	4	6	1	0.7879	0.823	0.1688	0.0280015	4.89222	1.18704	20.1626
USP45-AT-77062	ID_77062	USP45	AT	17	NA	NA	0	1	0.501	0.0747	0.0280954	15.0552	1.33832	169.36
UBE2Z-AP-42241	ID_42241	UBE2Z	AP	2.1	NA	NA	0	0.8293	0.9061	0.1707	0.0281175	3.79437	1.15389	12.4771
UBE2Z-AP-42242	ID_42242	UBE2Z	AP	1	NA	NA	0	0.8293	0.9061	0.1707	0.0281217	0.263557	0.0801488	0.866664
LETMD1-ES-21749	ID_21749	LETMD1	ES	3.2	2	4	0	0.7845	0.6842	0.1287	0.0281243	0.153596	0.0288443	0.817895
PLEKHA5-AT-20647	ID_20647	PLEKHA5	AT	35	NA	NA	0	1	0.6285	0.051	0.0282031	13.5225	1.32086	138.437
SLC13A3-AT-59696	ID_59696	SLC13A3	AT	5	NA	NA	0	0.9328	0.8715	0.1701	0.0282308	3.3514	1.13773	9.87219
ZNF493-AT-48769	ID_48769	ZNF493	AT	6	NA	NA	0	1	0.6988	0.1316	0.0282822	0.181161	0.0393619	0.833784
CPNE1-ES-59192	ID_59192	CPNE1	ES	2.1:2.2	1.2	5	0	0.7966	0.8207	0.1198	0.0283192	0.088719	0.0101801	0.773184
MFSD11-RI-43686	ID_43686	MFSD11	RI	2.3:2.4:2.5	2.2	2.6	0	0.7603	0.715	0.1699	0.0284717	0.233145	0.0633669	0.857805
BSCL2-AD-16409	ID_16409	BSCL2	AD	4.2:4.3	4.1	5	0	0.8776	1	0.1822	0.0285784	0.233384	0.0634349	0.858649
ATRAID-AD-52953	ID_52953	ATRAID	AD	1.2	1.1	2	0	0.9966	0.7786	0.093	0.0285929	9.69638	1.26839	74.1255
BUB3-AA-13390	ID_13390	BUB3	AA	8.1	7	8.2	0	1	0.9811	0.1506	0.0286509	4.55479	1.17137	17.7109
SLCO3A1-AT-32546	ID_32546	SLCO3A1	AT	10.2	NA	NA	0	1	0.7869	0.1283	0.0287182	0.171018	0.0351406	0.832293
SLCO3A1-AT-32547	ID_32547	SLCO3A1	AT	11	NA	NA	0	1	0.7869	0.1283	0.0287182	5.84733	1.2015	28.4571
FBL-ES-49850	ID_49850	FBL	ES	2	1	3	0	1	0.7888	0.0349	0.028759	0.0501173	0.00342619	0.733101
TBC1D10A-AP-61714	ID_61714	TBC1D10A	AP	3	NA	NA	0	0.8431	1	0.1865	0.0288831	2.89364	1.11568	7.50498
C5orf45-RI-74948	ID_74948	C5orf45	RI	7.2	7.1	7.3	0	1	0.956	0.1675	0.0289466	3.61124	1.14092	11.4303
CBR4-AT-71135	ID_71135	CBR4	AT	9	NA	NA	0	1	0.5198	0.0605	0.0290421	15.4146	1.3223	179.695
ATXN2L-ES-35840	ID_35840	ATXN2L	ES	22.3:22.4:22.6	22.2	22.7	0	0.7621	1	0.2382	0.0290944	0.284991	0.0922959	0.879991
ATF5-AP-51134	ID_51134	ATF5	AP	1	NA	NA	0	0.9138	0.859	0.1573	0.0291935	0.172535	0.0355672	0.836957
ATF5-AP-51133	ID_51133	ATF5	AP	2.1	NA	NA	0	0.9138	0.859	0.1573	0.0291936	5.79593	1.1948	28.1158
MLF1IP-ES-71315	ID_71315	MLF1IP	ES	11	10	13	0	0.9086	0.5337	0.1008	0.0292141	0.117926	0.0172643	0.805508
RANBP3-ES-46967	ID_46967	RANBP3	ES	5	4.1	7	0	0.8724	1	0.1456	0.0292302	0.159217	0.0305244	0.830487
ZNF430-AT-48742	ID_48742	ZNF430	AT	5	NA	NA	0	1	0.5368	0.1052	0.0292652	7.09656	1.21861	41.3269
ATPIF1-RI-1380	ID_1380	ATPIF1	RI	2.2	2.1	2.3	0	1	0.7312	0.132	0.0293595	7.17539	1.2187	42.2467
ZNF606-AT-52380	ID_52380	ZNF606	AT	3.2	NA	NA	0	1	0.9309	0.1476	0.029424	3.71019	1.1401	12.0739
MFSD10-RI-68614	ID_68614	MFSD10	RI	12.2	12.1	12.3	0	0.9948	0.6113	0.0815	0.0294496	14.9355	1.30998	170.284
TMPRSS13-AT-18949	ID_18949	TMPRSS13	AT	13	NA	NA	0	0.9741	0.878	0.1676	0.0295501	0.264017	0.079561	0.876117
MSL1-ES-40844	ID_40844	MSL1	ES	4	3.1	5	0	0.7741	1	0.121	0.029599	0.171989	0.0352142	0.84001
CUX1-AP-81068	ID_81068	CUX1	AP	1	NA	NA	0	0.7948	0.6126	0.0873	0.0296292	0.100061	0.0125712	0.796442
CUX1-AP-81069	ID_81069	CUX1	AP	2	NA	NA	0	0.7948	0.6126	0.0873	0.0296292	9.99388	1.25558	79.5467
CCDC24-RI-2524	ID_2524	CCDC24	RI	7.2	7.1	7.3	0	0.9845	0.5892	0.0536	0.0296294	24.9132	1.37425	451.641
NPRL2-AA-65039	ID_65039	NPRL2	AA	3.1	2.1	3.2	0	0.8862	0.7563	0.0886	0.029669	0.104779	0.0137151	0.800475
ALPL-ES-978	ID_978	ALPL	ES	3	1	4	0	0.8379	0.7055	0.0438	0.0298311	0.0561084	0.00417204	0.754584
TBC1D22A-AP-62720	ID_62720	TBC1D22A	AP	2	NA	NA	0	0.9276	1	0.2118	0.0298356	2.5613	1.09628	5.98411
CALCOCO2-ES-42234	ID_42234	CALCOCO2	ES	0.0854167	1	6	0	0.7552	0.5554	0.0592	0.0301342	0.0307652	0.00132253	0.715674
PIH1D2-AT-18717	ID_18717	PIH1D2	AT	6	NA	NA	0	0.8552	0.9295	0.1343	0.0302618	0.183346	0.0395205	0.850592
HOXA10-AP-79056	ID_79056	HOXA10	AP	2	NA	NA	0	0.8845	1	0.213	0.0303651	2.72154	1.0996	6.73593
HOXA10-AP-79055	ID_79055	HOXA10	AP	1	NA	NA	0	0.8845	1	0.213	0.0303662	0.367442	0.148459	0.909432
PACRGL-ES-68882	ID_68882	PACRGL	ES	0.466667	9	13.1	0	0.8138	1	0.2353	0.0304236	2.78091	1.10149	7.02093
ARMCX4-AT-89649	ID_89649	ARMCX4	AT	18.3	NA	NA	0	0.9707	0.9755	0.2479	0.0306255	2.5026	1.08946	5.7487
RNF165-AT-45395	ID_45395	RNF165	AT	1.5	NA	NA	0	0.9328	1	0.2627	0.0306975	2.52608	1.09002	5.8541
RNF165-AT-45394	ID_45394	RNF165	AT	8	NA	NA	0	0.9328	1	0.2627	0.0306977	0.39587	0.170821	0.917415
GK-AT-88731	ID_88731	GK	AT	24	NA	NA	0	0.9776	0.6568	0.0558	0.0306982	0.0576982	0.00434064	0.766958
GK-AT-88733	ID_88733	GK	AT	6	NA	NA	0	0.9776	0.6568	0.0558	0.0306982	17.3316	1.30385	230.381
CCDC157-AT-61732	ID_61732	CCDC157	AT	3.3	NA	NA	0	1	0.8222	0.153	0.0308901	4.86889	1.15671	20.4944
CCDC157-AT-61733	ID_61733	CCDC157	AT	12	NA	NA	0	1	0.8222	0.153	0.0308954	0.205396	0.0487965	0.864564
ADAM15-ES-7905	ID_7905	ADAM15	ES	22.1	20	23	0	0.9966	0.6482	0.1359	0.0310357	5.56321	1.1694	26.4661
PORCN-AA-88989	ID_88989	PORCN	AA	3.1	2.2	3.2	0	0.8966	0.8485	0.1446	0.0313216	5.29114	1.16108	24.1122
GULP1-AT-56500	ID_56500	GULP1	AT	15	NA	NA	0	0.9776	0.971	0.1369	0.0315359	0.262504	0.0775664	0.888378
GULP1-AT-56499	ID_56499	GULP1	AT	9.2	NA	NA	0	0.9776	0.971	0.1369	0.0315383	3.80942	1.12563	12.8921
CDKL3-AT-73366	ID_73366	CDKL3	AT	17	NA	NA	0	0.8155	0.8699	0.2138	0.0315473	3.32865	1.1122	9.96209
TFCP2-AA-21800	ID_21800	TFCP2	AA	15.1	14	15.2	0	0.9655	0.8053	0.0772	0.0315808	0.085357	0.00905312	0.804785
SYPL1-ES-81328	ID_81328	SYPL1	ES	6	5	7	0	0.9552	1	0.0954	0.0316917	4.58054	1.14271	18.3611
FN1-ES-57397	ID_57397	FN1	ES	33	32	34	0	0.9724	0.8519	0.1388	0.0317744	5.09387	1.15257	22.5128
FANK1-ES-13444	ID_13444	FANK1	ES	0.509028	11	14	0	0.8431	0.7555	0.143	0.0319166	6.30846	1.17263	33.9381
CYB561A3-ES-16167	ID_16167	CYB561A3	ES	5.1:5.2:6.1:6.2	4.2	6.3	0	0.9966	0.7773	0.0535	0.0319266	0.0551518	0.00390709	0.778514
MTIF2-ES-53607	ID_53607	MTIF2	ES	4	3	5	0	0.831	1	0.2546	0.0319885	2.46381	1.08071	5.61705
IL18R1-AT-54800	ID_54800	IL18R1	AT	13	NA	NA	0	0.9655	0.5672	0.0513	0.0320224	0.0519288	0.00347659	0.775643
IL18R1-AT-54799	ID_54799	IL18R1	AT	6	NA	NA	0	0.9655	0.5672	0.0513	0.0320224	19.2571	1.28925	287.638
G6PD-AP-90646	ID_90646	G6PD	AP	1	NA	NA	0	0.8845	0.8587	0.1688	0.0320362	4.04258	1.12736	14.4962
G6PD-AP-90647	ID_90647	G6PD	AP	2	NA	NA	0	0.8845	0.8587	0.1688	0.0320362	0.247367	0.0689837	0.887026
HDAC9-AT-78890	ID_78890	HDAC9	AT	30	NA	NA	0	0.9966	0.8401	0.0978	0.0320479	6.27952	1.17065	33.6841
WWOX-AT-37676	ID_37676	WWOX	AT	1.2	NA	NA	0	0.9983	0.6221	0.0972	0.0320992	0.0627338	0.00498653	0.789232
PRKAB1-ES-24709	ID_24709	PRKAB1	ES	3	1.3	4	0	0.8983	1	0.1443	0.0321859	3.98157	1.12466	14.0958
TPGS2-AT-45263	ID_45263	TPGS2	AT	11	NA	NA	0	1	0.7679	0.1223	0.0321942	0.12398	0.0183548	0.837438
STK40-RI-1772	ID_1772	STK40	RI	11.2	11.1	11.3	0	0.9603	1	0.0611	0.0321969	7.87271	1.19163	52.0126
FAM47E-AT-69601	ID_69601	FAM47E	AT	11	NA	NA	0	1	0.891	0.2184	0.0322343	2.88292	1.0939	7.59779
FAM47E-AT-69602	ID_69602	FAM47E	AT	10	NA	NA	0	1	0.891	0.2184	0.0322373	0.346877	0.13162	0.914174
DNAJB12-RI-12090	ID_12090	DNAJB12	RI	9.3	9.2	9.4	0	1	0.7025	0.1273	0.0323954	5.50054	1.1538	26.2228
SCIMP-AT-38666	ID_38666	SCIMP	AT	5	NA	NA	0	0.9948	0.822	0.1841	0.0324189	3.21379	1.10276	9.36598
SCIMP-AT-38667	ID_38667	SCIMP	AT	6	NA	NA	0	0.9948	0.822	0.1841	0.0324237	0.311169	0.106773	0.906841
PARPBP-AT-24029	ID_24029	PARPBP	AT	14	NA	NA	0	0.9966	0.5894	0.0721	0.0324352	0.0659911	0.00546744	0.796503
PRAME-AP-61276	ID_61276	PRAME	AP	1	NA	NA	0	0.8914	0.9067	0.1721	0.0325021	3.52479	1.11072	11.1857
TSNARE1-AT-85343	ID_85343	TSNARE1	AT	13	NA	NA	0	1	0.9484	0.0688	0.0325801	0.122211	0.0177801	0.840015
TSNARE1-AT-85342	ID_85342	TSNARE1	AT	15	NA	NA	0	1	0.9484	0.0688	0.0325801	8.18256	1.19046	56.2426
SARDH-AT-88078	ID_88078	SARDH	AT	24	NA	NA	0	0.9362	0.8073	0.1206	0.0329675	0.207971	0.0491109	0.880699
FGD6-AT-23744	ID_23744	FGD6	AT	21	NA	NA	0	1	0.5923	0.0628	0.0330005	0.066023	0.0054284	0.803007
FGD6-AT-23745	ID_23745	FGD6	AT	19.2	NA	NA	0	1	0.5923	0.0628	0.0330005	15.1462	1.24532	184.216
NMRAL1-RI-33736	ID_33736	NMRAL1	RI	2.4:2.5	2.3	2.6	0	0.8707	0.9386	0.1982	0.0330446	0.278088	0.0857242	0.902111
TCF20-ES-62502	ID_62502	TCF20	ES	4.2	3	5	0	0.9707	1	0.1638	0.0331905	3.65659	1.1089	12.0575
PCBP2-AP-22045	ID_22045	PCBP2	AP	4	NA	NA	0	0.9948	0.8692	0.1395	0.0333159	4.98883	1.13552	21.9181
PCBP2-AP-22043	ID_22043	PCBP2	AP	1	NA	NA	0	0.9948	0.8692	0.1395	0.0333167	0.200448	0.0456241	0.880661
KXD1-AP-48454	ID_48454	KXD1	AP	3.1	NA	NA	0	1	0.8461	0.0815	0.0333646	5.94099	1.15079	30.6706
IRAK3-AT-22911	ID_22911	IRAK3	AT	2	NA	NA	0	0.981	0.5022	0.0777	0.0333856	0.0184191	0.000464602	0.730226
IRAK3-AT-22910	ID_22910	IRAK3	AT	13	NA	NA	0	0.981	0.5022	0.0777	0.0333936	54.2755	1.36918	2151.53
RBM6-ES-64940	ID_64940	RBM6	ES	3.2	2	4	0	0.9534	0.6222	0.0915	0.033437	15.4747	1.2397	193.163
TMEM230-AD-58640	ID_58640	TMEM230	AD	1.3	1.2	4	0	0.75	0.6561	0.1173	0.0334708	10.5569	1.20257	92.6753
LCLAT1-AT-53115	ID_53115	LCLAT1	AT	8	NA	NA	0	1	0.8667	0.104	0.033489	4.55117	1.12576	18.3992
LCLAT1-AT-53116	ID_53116	LCLAT1	AT	9	NA	NA	0	1	0.8667	0.104	0.0334891	0.219724	0.0543503	0.888288
CD74-ES-74080	ID_74080	CD74	ES	6:7.1:8:9:10.1	4	10.2	0	1	0.5737	0.0621	0.0335736	0.0474166	0.0028496	0.789001
LSR-ES-49086	ID_49086	LSR	ES	5	3	6	0	0.9948	0.8157	0.1437	0.0335997	0.220915	0.0548702	0.889436
DVL1-AD-141	ID_141	DVL1	AD	11.2	11.1	12	0	0.9828	0.8348	0.152	0.033612	0.198302	0.0445795	0.882105
RNF220-AP-2554	ID_2554	RNF220	AP	1.1	NA	NA	0	0.8621	0.515	0.0732	0.0336627	11.0372	1.20387	101.19
RASA4-ES-81122	ID_81122	RASA4	ES	17	16	18	0	0.9948	0.5782	0.116	0.0337363	0.169344	0.0328726	0.872375
CWC25-AD-40597	ID_40597	CWC25	AD	6.2	6.1	7	0	0.9224	1	0.2428	0.0337723	0.353984	0.135694	0.923437
ZNF430-AT-48741	ID_48741	ZNF430	AT	6	NA	NA	0	1	0.6618	0.1283	0.0338011	0.207313	0.0484805	0.886518
DIDO1-AT-60092	ID_60092	DIDO1	AT	17	NA	NA	0	1	0.8308	0.1487	0.0339075	0.179162	0.0365799	0.877501
PDLIM7-AA-74781	ID_74781	PDLIM7	AA	10.1	8	10.2	0	0.9966	0.8981	0.1209	0.0345622	4.66841	1.1184	19.4868
SLC11A2-RI-21731	ID_21731	SLC11A2	RI	23.2	23.1	23.3	0	1	0.6112	0.075	0.0346294	25.8385	1.26496	527.787
CNOT2-AT-23366	ID_23366	CNOT2	AT	5	NA	NA	0	1	0.8314	0.0673	0.0346825	7.49704	1.15611	48.6162
STK32C-AP-13485	ID_13485	STK32C	AP	4	NA	NA	0	0.9897	0.6345	0.1112	0.0347676	6.03578	1.13731	32.0324
MLXIP-AP-24923	ID_24923	MLXIP	AP	1	NA	NA	0	0.9345	1	0.1565	0.0347701	0.311385	0.105404	0.919902
TMEM138-RI-16188	ID_16188	TMEM138	RI	3.3	3.2	3.4	0	0.9966	0.9967	0.0867	0.0347731	5.21764	1.12546	24.189
MLXIP-AP-24922	ID_24922	MLXIP	AP	9.1	NA	NA	0	0.9345	1	0.1565	0.0347733	3.21141	1.08705	9.48728
RNF4-AP-68565	ID_68565	RNF4	AP	1.1	NA	NA	0	0.8569	1	0.165	0.0347928	0.345508	0.128792	0.926886
IRF7-ES-13715	ID_13715	IRF7	ES	4	3.2	5.1	0	0.981	0.5206	0.1032	0.0348621	13.325	1.20213	147.701
ENTHD2-ES-44111	ID_44111	ENTHD2	ES	8	7	9	0	0.969	0.5179	0.0907	0.0349178	0.111294	0.0144697	0.856026
MAGIX-AA-89089	ID_89089	MAGIX	AA	4.1	3	4.2	0	0.8586	0.7172	0.1197	0.0349718	0.132543	0.0202586	0.867165
ZNF66-AT-48728	ID_48728	ZNF66	AT	5	NA	NA	0	0.9345	1	0.2571	0.0349947	0.383141	0.157056	0.934682
VSTM4-AT-11499	ID_11499	VSTM4	AT	3	NA	NA	0	1	0.7585	0.155	0.0350055	3.77174	1.0979	12.9575
VSTM4-AT-11498	ID_11498	VSTM4	AT	9	NA	NA	0	1	0.7585	0.155	0.035006	0.265131	0.0771759	0.910833
TMEM176B-AP-82257	ID_82257	TMEM176B	AP	4.1	NA	NA	0	0.8776	0.8312	0.1068	0.0351574	4.44204	1.10933	17.7871
HDAC9-AT-78891	ID_78891	HDAC9	AT	16.2	NA	NA	0	0.9966	0.8401	0.0982	0.0352215	0.163993	0.0304808	0.882312
PTPN6-AP-20022	ID_20022	PTPN6	AP	1	NA	NA	0	0.9345	1	0.1958	0.0353582	3.73791	1.09461	12.7643
PTPN6-AP-20023	ID_20023	PTPN6	AP	2	NA	NA	0	0.9345	1	0.1958	0.0353582	0.267529	0.0783433	0.913566
IRF3-ES-50995	ID_50995	IRF3	ES	5.1:5.2	4	6.2	0	0.9828	0.7462	0.1255	0.035386	0.225788	0.0564444	0.903193
HMGN3-AD-76814	ID_76814	HMGN3	AD	5.2	5.1	6	0	1	0.5863	0.0751	0.0354635	19.639	1.22452	314.973
MAP1LC3A-RI-59030	ID_59030	MAP1LC3A	RI	6.2	6.1	6.3	0	0.9983	0.6622	0.1059	0.0355514	11.8166	1.18163	118.169
SVEP1-AT-87186	ID_87186	SVEP1	AT	28.2	NA	NA	0	0.9086	0.8703	0.1727	0.0356068	3.31097	1.08391	10.1139
KIAA1522-AP-1631	ID_1631	KIAA1522	AP	2	NA	NA	0	0.7672	1	0.176	0.0356149	4.59808	1.10806	19.0805
GRIPAP1-ES-89052	ID_89052	GRIPAP1	ES	18	17	19	0	0.9879	0.7725	0.0535	0.0356226	0.0629929	0.00477854	0.830399
SEC31A-ES-69730	ID_69730	SEC31A	ES	26.1:26.2:27	25.1	28	0	0.9759	1	0.2666	0.0356239	0.414987	0.182702	0.942598
COQ10B-AP-56683	ID_56683	COQ10B	AP	2.1	NA	NA	0	0.8914	0.8125	0.0692	0.0358629	22.4689	1.22804	411.103
COQ10B-AP-56682	ID_56682	COQ10B	AP	1	NA	NA	0	0.8914	0.8125	0.0692	0.0358642	0.0445065	0.00243249	0.814321
RNF220-AP-2555	ID_2555	RNF220	AP	7	NA	NA	0	0.8621	0.515	0.0806	0.0358919	0.107103	0.0132893	0.863181
CHD2-AT-32559	ID_32559	CHD2	AT	40	NA	NA	0	1	0.5978	0.0724	0.0359039	0.0647984	0.00502722	0.835219
EFCAB10-AT-81301	ID_81301	EFCAB10	AT	5.2	NA	NA	0	0.8466	0.7468	0.1366	0.0362022	0.176799	0.034942	0.894568
EFCAB10-AT-81300	ID_81300	EFCAB10	AT	4.2	NA	NA	0	0.8466	0.7468	0.1366	0.0362032	5.65605	1.11785	28.6183
BLCAP-AP-59355	ID_59355	BLCAP	AP	3	NA	NA	0	0.8362	0.8849	0.1781	0.0362678	0.110365	0.0140248	0.8685
CNOT2-AT-23370	ID_23370	CNOT2	AT	17	NA	NA	0	1	0.8368	0.0676	0.0362861	0.135998	0.0210093	0.880342
MED17-AT-18327	ID_18327	MED17	AT	2.2	NA	NA	0	1	0.8797	0.0873	0.0363634	5.07443	1.10863	23.2268
MED17-AT-18328	ID_18328	MED17	AT	12.2	NA	NA	0	1	0.8797	0.0873	0.0363719	0.197076	0.043055	0.902081
HSPB11-AT-3099	ID_3099	HSPB11	AT	7	NA	NA	0	1	0.52	0.062	0.0365362	16.3856	1.1914	225.354
ZSWIM7-RI-39393	ID_39393	ZSWIM7	RI	7.2	7.1	7.3	0	1	0.7494	0.1134	0.0365465	0.157778	0.027943	0.890878
THAP6-AT-69530	ID_69530	THAP6	AT	5	NA	NA	0	1	0.9054	0.1648	0.0365577	0.284266	0.0874181	0.924374
AHI1-AT-77890	ID_77890	AHI1	AT	27	NA	NA	0	1	0.7103	0.1146	0.0366526	0.111964	0.0143601	0.872973
SULT1A4-AP-94111	ID_94111	SULT1A4	AP	2.1	NA	NA	0	0.7931	0.6803	0.0832	0.0368204	10.9432	1.15772	103.439
UBE2D4-ES-79372	ID_79372	UBE2D4	ES	6	5.1	7.1	0	0.8776	1	0.163	0.0368549	3.33236	1.07623	10.3181
COX15-AT-12776	ID_12776	COX15	AT	9	NA	NA	0	1	0.5879	0.0774	0.0368831	14.8313	1.17847	186.655
COX15-AT-12777	ID_12777	COX15	AT	10	NA	NA	0	1	0.5879	0.0774	0.0368915	0.067433	0.00535812	0.848658
MKNK1-ES-2807	ID_2807	MKNK1	ES	16	15.2	17	0	0.9155	0.7581	0.1436	0.0369223	4.84788	1.10056	21.3545
LRRC23-ES-20007	ID_20007	LRRC23	ES	5	4	6	0	0.95	0.9198	0.1683	0.0370047	0.263543	0.0752697	0.922748
RBM6-RI-64936	ID_64936	RBM6	RI	14.2	14.1	14.3	0	0.9966	0.935	0.1943	0.0370393	0.32263	0.111415	0.934252
GLOD4-ES-38275	ID_38275	GLOD4	ES	3	1	4.2	0	0.8862	1	0.1573	0.0370846	2.85818	1.06492	7.67117
S100PBP-AT-1635	ID_1635	S100PBP	AT	9	NA	NA	0	1	0.9491	0.2163	0.0370851	0.383656	0.155884	0.944239
S100PBP-AT-1636	ID_1636	S100PBP	AT	7	NA	NA	0	1	0.9491	0.2163	0.0370865	2.60648	1.05905	6.41495
AK3-ES-85777	ID_85777	AK3	ES	3	2	4	0	0.9517	0.6471	0.0351	0.0371097	0.0258373	0.000830601	0.803715
NR1H3-RI-15699	ID_15699	NR1H3	RI	8.2	8.1	8.3	0	0.95	1	0.1006	0.0373372	9.41709	1.14054	77.7539
RPS6KA1-AP-1279	ID_1279	RPS6KA1	AP	3	NA	NA	0	0.8121	0.7513	0.1087	0.0373504	0.0489711	0.00286166	0.838035
MAP6-AT-17875	ID_17875	MAP6	AT	4	NA	NA	0	0.9845	1	0.0803	0.0373634	0.168056	0.0313492	0.900907
MAP6-AT-17874	ID_17874	MAP6	AT	3.2	NA	NA	0	0.9845	1	0.0803	0.0373653	5.95034	1.10997	31.8986
GULP1-AP-56497	ID_56497	GULP1	AP	2.1	NA	NA	0	0.8638	0.8313	0.1339	0.037368	6.05019	1.11103	32.9468
EXD3-AT-88296	ID_88296	EXD3	AT	3	NA	NA	0	1	0.9133	0.2085	0.0374753	2.76303	1.06067	7.19761
PFDN5-ES-22004	ID_22004	PFDN5	ES	0.0868056	1	6.2	0	0.9414	1	0.1983	0.0374846	0.337698	0.121439	0.939066
LMO4-AP-3695	ID_3695	LMO4	AP	2	NA	NA	0	0.9948	0.6549	0.1291	0.0375251	0.177478	0.0348036	0.905038
LMO4-AP-3694	ID_3694	LMO4	AP	1	NA	NA	0	0.9948	0.6549	0.1291	0.0375306	5.63417	1.10487	28.7309
MED11-AT-38577	ID_38577	MED11	AT	3.2	NA	NA	0	1	0.7719	0.0942	0.0376301	0.182933	0.0368789	0.907419
MED11-AT-38578	ID_38578	MED11	AT	2.2	NA	NA	0	1	0.7719	0.0942	0.0376482	5.46584	1.10185	27.1138
FUS-AA-36248	ID_36248	FUS	AA	4.1	3	4.2	0	0.9931	0.5815	0.0498	0.0377323	75.0377	1.27735	4408.09
RNH1-AP-13662	ID_13662	RNH1	AP	2	NA	NA	0	0.9983	0.7353	0.0943	0.0377993	8.92093	1.13127	70.3485
PCSK7-ES-18901	ID_18901	PCSK7	ES	14	13	15	0	0.9431	0.6295	0.098	0.0378418	7.26978	1.11783	47.2789
SIRT2-ES-49714	ID_49714	SIRT2	ES	0.00142477	1	3.2	0	0.85	1	0.1449	0.0380039	3.71612	1.07537	12.8417
PGBD2-AA-10573	ID_10573	PGBD2	AA	4.1	2	4.2	0	0.8655	0.7667	0.1466	0.0380185	7.13414	1.11474	45.6572
TMPRSS13-AT-18947	ID_18947	TMPRSS13	AT	9.2	NA	NA	0	0.9741	0.7691	0.1586	0.0380206	3.65864	1.07433	12.4596
AK9-AT-77203	ID_77203	AK9	AT	12.2	NA	NA	0	0.9966	0.8933	0.1924	0.0380561	3.32004	1.06835	10.3174
NAP1L1-AP-23468	ID_23468	NAP1L1	AP	7.1	NA	NA	0	0.9983	1	0.1051	0.0380862	5.70015	1.10036	29.5282
NAP1L1-AP-23467	ID_23467	NAP1L1	AP	1	NA	NA	0	0.9983	1	0.1051	0.0380869	0.175435	0.033866	0.908797
SSBP3-ES-3144	ID_3144	SSBP3	ES	7	6	8	0	0.981	1	0.1762	0.0382528	3.62329	1.07218	12.2445
RASA4B-ES-81102	ID_81102	RASA4B	ES	17	16	18	0	0.9397	0.5949	0.1136	0.0382555	0.157512	0.0274201	0.904812
KIF9-AT-64493	ID_64493	KIF9	AT	24	NA	NA	0	0.9741	0.7303	0.0949	0.0384087	0.0438008	0.0022671	0.846243
KIF9-AT-64495	ID_64495	KIF9	AT	5.2	NA	NA	0	0.9741	0.7303	0.0949	0.0384258	22.8206	1.18136	440.83
NPIPB4-RI-35506	ID_35506	NPIPB4	RI	9.3	9.2	9.4	0	0.9328	0.8701	0.1311	0.0386073	0.195013	0.0414315	0.917907
ATXN2L-AD-35857	ID_35857	ATXN2L	AD	22.2:22.3:22.4	22.1	22.6	0	0.9759	0.654	0.0928	0.0386456	0.0669891	0.00516782	0.868361
LRRC37A3-AP-43079	ID_43079	LRRC37A3	AP	11.1	NA	NA	0	0.9224	0.9179	0.161	0.0387062	4.25521	1.07809	16.7953
SERPING1-AP-15865	ID_15865	SERPING1	AP	2.1	NA	NA	0	0.9328	0.7892	0.1222	0.038822	5.43746	1.09085	27.1035
SERPING1-AP-15866	ID_15866	SERPING1	AP	1	NA	NA	0	0.9328	0.7892	0.1222	0.0388229	0.18391	0.0368957	0.91672
C9orf117-RI-87645	ID_87645	C9orf117	RI	5.4	5.3	5.5	0	0.8345	1	0.2233	0.03884	3.39547	1.06468	10.8288
CTBP2-AP-13411	ID_13411	CTBP2	AP	1	NA	NA	0	0.8948	1	0.1492	0.038851	3.99793	1.07355	14.8884
WTAP-AT-78313	ID_78313	WTAP	AT	7.2	NA	NA	0	1	0.6338	0.1216	0.0388854	6.66539	1.10168	40.3271
WTAP-AT-78312	ID_78312	WTAP	AT	9	NA	NA	0	1	0.6338	0.1216	0.0388879	0.150033	0.024798	0.907729
UPF1-AD-48507	ID_48507	UPF1	AD	7.2	7.1	8	0	0.8517	0.5611	0.0777	0.0390042	14.7082	1.14532	188.884
PQBP1-AD-89030	ID_89030	PQBP1	AD	1.2	1.1	2.3	0	0.9672	0.5871	0.0867	0.0390775	0.0923699	0.00961399	0.887478
RSAD1-AD-42400	ID_42400	RSAD1	AD	8.2	8.1	9	0	0.8741	0.5933	0.1016	0.0392032	6.91628	1.10047	43.4677
PTGR1-AA-87219	ID_87219	PTGR1	AA	12.1	11	12.2	0	1	0.8836	0.1125	0.0392306	4.61041	1.07838	19.711
DENND1B-AT-9304	ID_9304	DENND1B	AT	17	NA	NA	0	0.9569	0.8188	0.1109	0.0394138	0.100205	0.0112259	0.894449
DENND1B-AT-9305	ID_9305	DENND1B	AT	24	NA	NA	0	0.9569	0.8188	0.1109	0.0394157	9.97941	1.11798	89.0788
UEVLD-AT-14666	ID_14666	UEVLD	AT	8	NA	NA	0	1	0.7694	0.1072	0.0394171	5.21626	1.08336	25.1158
UEVLD-AT-14667	ID_14667	UEVLD	AT	14	NA	NA	0	1	0.7694	0.1072	0.0394183	0.19171	0.0398157	0.923066
C11orf74-AD-15442	ID_15442	C11orf74	AD	1.2	1.1	4	0	0.8793	0.9103	0.1538	0.0394887	3.97919	1.06872	14.8157
LIG1-AD-50689	ID_50689	LIG1	AD	24.2	24.1	25	0	0.9966	1	0.1186	0.0395156	4.30477	1.07257	17.2772
TRA2B-ES-68039	ID_68039	TRA2B	ES	2	1	3	0	0.9845	1	0.1474	0.0395637	3.46187	1.06111	11.2944
CYHR1-AP-85614	ID_85614	CYHR1	AP	1.1	NA	NA	0	0.9517	0.7831	0.181	0.0396066	3.60969	1.06295	12.2582
CYHR1-AP-85612	ID_85612	CYHR1	AP	3	NA	NA	0	0.9517	0.7831	0.181	0.039609	0.277037	0.0815796	0.940795
GCA-AP-55769	ID_55769	GCA	AP	2	NA	NA	0	0.9345	1	0.1309	0.039658	0.257702	0.0708103	0.937865
TBL2-AT-79963	ID_79963	TBL2	AT	8	NA	NA	0	1	0.5405	0.052	0.0397469	14.8196	1.13472	193.545
TBL2-AT-79962	ID_79962	TBL2	AT	10	NA	NA	0	1	0.5405	0.052	0.0397513	0.0674809	0.00516685	0.881323
NXNL2-AT-86786	ID_86786	NXNL2	AT	4	NA	NA	0	0.9155	1	0.2074	0.0397707	3.08807	1.05415	9.04635
NXNL2-AT-86787	ID_86787	NXNL2	AT	2	NA	NA	0	0.9155	1	0.2074	0.0397727	0.323832	0.110544	0.948645
MYL5-ES-68388	ID_68388	MYL5	ES	1.2:1.3:1.4:2	1.1	4.1	0	0.9569	0.8123	0.1193	0.0398801	0.238834	0.0609468	0.935928
RPL32-AA-63469	ID_63469	RPL32	AA	1.3	1.1	1.4	0	0.7862	0.8148	0.1145	0.0399321	0.107448	0.0127924	0.902492
CCDC84-AD-19052	ID_19052	CCDC84	AD	6.2	6.1	7	0	0.9276	1	0.1983	0.0400422	3.36501	1.05672	10.7156
NSUN5-RI-79933	ID_79933	NSUN5	RI	9.2:9.3	9.1	9.4	0	0.981	0.8202	0.1025	0.040089	0.175785	0.0334286	0.924367
KDM4C-AT-85825	ID_85825	KDM4C	AT	26	NA	NA	0	1	0.6072	0.0754	0.0401694	34.3857	1.17196	1008.89
BCKDHA-AP-50062	ID_50062	BCKDHA	AP	1	NA	NA	0	0.9897	0.9373	0.2015	0.0402108	0.345958	0.125496	0.953708
BCKDHA-AP-50063	ID_50063	BCKDHA	AP	2.1	NA	NA	0	0.9897	0.9373	0.2015	0.0402122	2.89051	1.04853	7.96832
SULT1A1-ES-35824	ID_35824	SULT1A1	ES	3	2	6.2	0	0.8724	0.6374	0.0855	0.0402323	40.8512	1.17973	1414.58
AURKAIP1-AD-151	ID_151	AURKAIP1	AD	1.2:1.3	1.1	1.5	0	0.9879	0.739	0.0804	0.0402444	9.38389	1.10475	79.7078
RAB43-ES-66695	ID_66695	RAB43	ES	6	5	7	0	0.8328	0.6851	0.0617	0.0403566	15.5779	1.12829	215.079
NPIPA5-RI-34148	ID_34148	NPIPA5	RI	8.2	8.1	8.3	0	0.9966	0.9197	0.134	0.0404197	4.81982	1.07107	21.6892
TCF20-ES-62501	ID_62501	TCF20	ES	4.1:4.2	3	5	0	0.9845	1	0.1781	0.0404255	3.32033	1.05375	10.4623
WRAP73-RI-320	ID_320	WRAP73	RI	11.2	11.1	11.3	0	1	0.9425	0.1066	0.0404538	6.22933	1.08281	35.8368
RBBP8-AP-44785	ID_44785	RBBP8	AP	19.1	NA	NA	0	0.7586	0.5307	0.0777	0.0404889	12.0254	1.11377	129.838
RIOK2-AT-72877	ID_72877	RIOK2	AT	8.2	NA	NA	0	1	0.8047	0.1033	0.0406026	5.74843	1.0777	30.6622
RIOK2-AT-72878	ID_72878	RIOK2	AT	10	NA	NA	0	1	0.8047	0.1033	0.0406145	0.173976	0.0326158	0.928002
DYX1C1-ES-30736	ID_30736	DYX1C1	ES	10	9	11	0	0.7724	0.7127	0.1338	0.0408168	8.73874	1.09476	69.7557
RBM39-ES-59249	ID_59249	RBM39	ES	5	3	6	0	0.9741	0.867	0.1524	0.0408226	0.190798	0.0390098	0.933199
WRB-AP-60627	ID_60627	WRB	AP	2	NA	NA	0	0.9345	0.6457	0.1161	0.0408918	5.87478	1.07607	32.0732
WRB-AP-60626	ID_60626	WRB	AP	1.1	NA	NA	0	0.9345	0.6457	0.1161	0.0408918	0.170219	0.0311787	0.929306
NAPEPLD-RI-81172	ID_81172	NAPEPLD	RI	6.2	6.1	6.3	0	0.8483	0.5784	0.09	0.0409123	0.115535	0.014593	0.914705
ZDHHC24-AT-17064	ID_17064	ZDHHC24	AT	3	NA	NA	0	1	0.5559	0.0824	0.0409202	0.0600921	0.00405541	0.890429
ZDHHC24-AT-17065	ID_17065	ZDHHC24	AT	7	NA	NA	0	1	0.5559	0.0824	0.040925	16.6403	1.12298	246.576
SYNE4-ES-102891	ID_102891	SYNE4	ES	2	1	3	1	0.8655	0.9015	0.1229	0.0409361	7.0176	1.08358	45.4482
CACNB3-ES-21476	ID_21476	CACNB3	ES	9	8	10	0	0.85	0.6029	0.0964	0.0410266	0.117212	0.0149932	0.916315
DNM1L-ES-21048	ID_21048	DNM1L	ES	17	16	18	0	0.8879	1	0.1733	0.0411818	3.92677	1.05628	14.5979
NFATC1-AT-46240	ID_46240	NFATC1	AT	9.2	NA	NA	0	0.9983	0.8352	0.1513	0.0412038	0.2146	0.0489716	0.940403
NFATC1-AT-46239	ID_46239	NFATC1	AT	11	NA	NA	0	0.9983	0.8352	0.1513	0.0412049	4.6598	1.06336	20.4198
ZNF549-AT-52283	ID_52283	ZNF549	AT	5	NA	NA	0	1	0.7454	0.1285	0.0412291	4.06821	1.05745	15.6512
ZNF549-AT-52284	ID_52284	ZNF549	AT	4	NA	NA	0	1	0.7454	0.1285	0.0412292	0.245809	0.0638929	0.945675
RNF213-AT-44046	ID_44046	RNF213	AT	69	NA	NA	0	1	0.5852	0.0874	0.0412799	0.109588	0.0131076	0.916235
LRTOMT-AT-17526	ID_17526	LRTOMT	AT	6.5	NA	NA	0	1	0.917	0.1296	0.0413319	0.206273	0.0452732	0.939818
LRTOMT-AT-17527	ID_17527	LRTOMT	AT	10	NA	NA	0	1	0.917	0.1296	0.041338	4.84774	1.06399	22.0873
MRPL2-ES-76239	ID_76239	MRPL2	ES	0.127836	2.1	7	0	0.9707	0.8831	0.1617	0.0413421	3.74798	1.05326	13.3371
CLCN6-AT-686	ID_686	CLCN6	AT	24	NA	NA	0	1	0.9036	0.1187	0.041355	0.228215	0.0551887	0.943713
CAST-AA-72852	ID_72852	CAST	AA	31.1	30	31.2	0	0.9948	0.6049	0.0648	0.0415517	29.5141	1.13835	765.215
TMC7-AT-34279	ID_34279	TMC7	AT	16.2	NA	NA	0	0.9448	0.7958	0.1883	0.041644	3.08268	1.04353	9.1065
TMC7-AT-34280	ID_34280	TMC7	AT	17	NA	NA	0	0.9448	0.7958	0.1883	0.0416491	0.324402	0.109815	0.958314
VEGFA-ES-76328	ID_76328	VEGFA	ES	7.1:7.2:8.1:8.2	6	9.1	0	0.9828	0.8744	0.154	0.0416666	3.95804	1.05329	14.8734
AZI2-AA-63795	ID_63795	AZI2	AA	8.1	7	8.2	0	0.8414	0.9211	0.1358	0.0417018	0.180629	0.0347937	0.937722
EIF3G-ES-47465	ID_47465	EIF3G	ES	5	4	6	0	1	0.9252	0.0773	0.0418156	4.825	1.06002	21.9623
NDUFA3-AT-51776	ID_51776	NDUFA3	AT	4.4	NA	NA	0	1	0.8113	0.2648	0.0420035	2.32355	1.03095	5.23678
LUC7L-ES-32850	ID_32850	LUC7L	ES	1.3	1.1	2.2	0	0.8241	1	0.1586	0.0420411	3.98828	1.05103	15.1341
C11orf57-AD-18728	ID_18728	C11orf57	AD	1.2:1.3	1.1	2.1	0	0.9621	0.9695	0.2063	0.0420542	0.366037	0.138908	0.964546
PCM1-ES-82840	ID_82840	PCM1	ES	25	24	27	0	0.8879	0.801	0.1286	0.0421193	0.171386	0.0312772	0.939118
HNRNPA1-ES-485363	ID_485363	HNRNPA1	ES	3:4:5:6.1:6.2:10:11.1:11.2	2	11.3	1	0.8069	0.7125	0.164	0.0422262	0.223828	0.0528025	0.948801
ZFC3H1-RI-23406	ID_23406	ZFC3H1	RI	32.2	32.1	32.3	0	0.9172	1	0.1397	0.0422483	3.64431	1.04631	12.6932
DYNC1I1-AT-80543	ID_80543	DYNC1I1	AT	6	NA	NA	0	0.9466	0.7077	0.0644	0.0423545	11.7385	1.08871	126.566
COPE-ES-48519	ID_48519	COPE	ES	0.170139	3	6	0	0.8276	1	0.2399	0.0423642	0.365927	0.138623	0.965945
RAB6A-ME-17707	ID_17707	RAB6A	ME	5|6	4	7	0	0.9776	0.7117	0.0935	0.0423783	10.7502	1.08512	106.502
CIRBP-RI-46424	ID_46424	CIRBP	RI	9.4:9.5	9.3	9.6	0	1	0.783	0.0645	0.0425334	75.2565	1.15662	4896.63
ZNF250-AT-85674	ID_85674	ZNF250	AT	6.3	NA	NA	0	1	0.6576	0.1325	0.0425335	0.199935	0.0422006	0.947237
CCDC80-AD-66114	ID_66114	CCDC80	AD	1.2	1.1	2	0	0.919	0.5449	0.0881	0.0426097	0.118287	0.0150232	0.931349
VEGFA-ES-76336	ID_76336	VEGFA	ES	7.1:7.2	6	8.1	0	0.9621	0.8056	0.1458	0.0426411	4.11686	1.04806	16.1714
AHCYL1-AP-4088	ID_4088	AHCYL1	AP	2.1	NA	NA	0	0.9241	0.7735	0.1308	0.0426433	0.129482	0.0179416	0.934459
AHCYL1-AP-4089	ID_4089	AHCYL1	AP	1	NA	NA	0	0.9241	0.7735	0.1308	0.0426461	7.72282	1.07011	55.7345
KCTD7-AT-79880	ID_79880	KCTD7	AT	17	NA	NA	0	1	0.6868	0.1225	0.0426911	5.31189	1.05655	26.706
KCTD7-AT-79881	ID_79881	KCTD7	AT	4.4	NA	NA	0	1	0.6868	0.1225	0.0426911	0.188256	0.0374442	0.946481
NLRP1-AT-38720	ID_38720	NLRP1	AT	19	NA	NA	0	0.9983	0.7163	0.1631	0.0426952	4.28631	1.04908	17.513
SYVN1-AA-16796	ID_16796	SYVN1	AA	7.1	6	7.2	0	0.9655	0.9124	0.0399	0.0427235	0.101105	0.0110198	0.927619
TFDP1-AP-26386	ID_26386	TFDP1	AP	3	NA	NA	0	0.7759	0.6954	0.1028	0.0428542	0.0839915	0.00763988	0.923388
DMKN-AD-49207	ID_49207	DMKN	AD	6.2	6.1	6.4	0	0.9276	0.7806	0.1047	0.04299	8.88423	1.07133	73.674
WDR96-AT-13041	ID_13041	WDR96	AT	22.2	NA	NA	0	0.8638	0.5099	0.0589	0.0430442	21.3527	1.10054	414.287
C16orf13-ES-32915	ID_32915	C16orf13	ES	4	3	5	0	0.9983	0.642	0.0972	0.0430496	0.139814	0.0207883	0.940334
PTPRC-AT-9320	ID_9320	PTPRC	AT	34	NA	NA	0	0.9879	0.6124	0.0859	0.0431265	0.128366	0.0175573	0.938513
RASSF7-RI-13689	ID_13689	RASSF7	RI	6.4	6.3	6.5	0	0.9897	0.5852	0.08	0.0434782	17.9006	1.08814	294.476
CCDC90B-AD-18086	ID_18086	CCDC90B	AD	1.2:1.3:1.4:1.5	1.1	2	0	0.7966	0.8733	0.2192	0.0434936	0.351255	0.127209	0.969901
SLC8B1-AP-24633	ID_24633	SLC8B1	AP	15.1	NA	NA	0	0.8259	1	0.2213	0.0435087	0.32706	0.11051	0.967956
NDUFAF1-ES-30087	ID_30087	NDUFAF1	ES	4	3	5	0	0.9879	0.9557	0.1487	0.0435194	3.4154	1.03638	11.2555
PHTF2-AT-80207	ID_80207	PHTF2	AT	14.2	NA	NA	0	1	0.509	0.0691	0.0435207	16.6013	1.08515	253.979
ZNF773-AT-52278	ID_52278	ZNF773	AT	6.3	NA	NA	0	0.9983	0.8972	0.1653	0.0435663	3.30495	1.03512	10.5521
ZNF773-AT-52279	ID_52279	ZNF773	AT	4	NA	NA	0	0.9983	0.8972	0.1653	0.0435663	0.302576	0.0947678	0.966072
RBM19-RI-24647	ID_24647	RBM19	RI	24.2	24.1	24.3	0	1	0.6854	0.1268	0.0435807	5.3131	1.04929	26.903
CCDC51-AA-64649	ID_64649	CCDC51	AA	3.1	2.2	3.2	0	0.8069	0.6629	0.1356	0.0436197	4.71012	1.04536	21.2225
ANGPTL4-ES-47224	ID_47224	ANGPTL4	ES	4	3	5	0	0.781	0.7416	0.0858	0.0437219	33.8817	1.10428	1039.57
DIS3L2-ES-57987	ID_57987	DIS3L2	ES	20	19	21	0	0.9655	0.57	0.0749	0.0437807	0.0153152	0.000263544	0.890006
CLCN6-AT-688	ID_688	CLCN6	AT	6	NA	NA	0	1	0.8995	0.1175	0.0438616	4.33975	1.04121	18.088
PPIE-AD-1910	ID_1910	PPIE	AD	1.2	1.1	2	0	0.8741	0.5135	0.0834	0.0442236	0.0904698	0.00870919	0.939787
TDRKH-AT-7662	ID_7662	TDRKH	AT	15.3	NA	NA	0	1	0.6675	0.1253	0.0442826	6.62149	1.04953	41.7749
SENP5-ES-68262	ID_68262	SENP5	ES	2	1	3	0	0.9724	0.5944	0.0731	0.0442993	0.121143	0.015487	0.947601
ZNF66-AT-48730	ID_48730	ZNF66	AT	7	NA	NA	0	0.9345	0.9953	0.2884	0.0443286	2.22802	1.02053	4.86421
PI4K2A-AP-12729	ID_12729	PI4K2A	AP	3	NA	NA	0	0.8241	1	0.246	0.0443846	0.38087	0.148621	0.976056
PI4K2A-AP-12728	ID_12728	PI4K2A	AP	1	NA	NA	0	0.8241	1	0.246	0.0443892	2.62551	1.02451	6.72841
STOX1-AD-11963	ID_11963	STOX1	AD	3.2	3.1	4.1	0	0.9879	0.5817	0.1216	0.0444107	7.67974	1.05226	56.0494
FLNB-AD-65417	ID_65417	FLNB	AD	32.2	32.1	33	0	0.8862	0.5014	0.0773	0.0445509	0.0938594	0.00933191	0.944027
C1orf145-AT-10194	ID_10194	C1orf145	AT	4	NA	NA	0	0.8345	1	0.1402	0.0446304	4.65504	1.03757	20.8847
C1orf145-AT-10195	ID_10195	C1orf145	AT	5	NA	NA	0	0.8345	1	0.1402	0.044632	0.214822	0.047882	0.963801
AASDH-AT-69343	ID_69343	AASDH	AT	11.2	NA	NA	0	0.9983	0.5783	0.0578	0.0447005	15.5143	1.06702	225.576
AASDH-AT-69342	ID_69342	AASDH	AT	15	NA	NA	0	0.9983	0.5783	0.0578	0.0447188	0.0644674	0.00443356	0.937407
CDKN2A-AP-86004	ID_86004	CDKN2A	AP	2	NA	NA	0	0.9172	1	0.1726	0.0447232	3.28734	1.02843	10.5079
CISD2-ES-70154	ID_70154	CISD2	ES	3	1	4	0	0.981	1	0.1187	0.0447998	3.04334	1.02616	9.02577
RACGAP1-AT-21625	ID_21625	RACGAP1	AT	21	NA	NA	0	1	0.8478	0.1	0.044808	0.0556414	0.00331027	0.935259
RACGAP1-AT-21628	ID_21628	RACGAP1	AT	20	NA	NA	0	1	0.8478	0.1	0.0448112	17.9712	1.06918	302.066
MICAL3-AT-61012	ID_61012	MICAL3	AT	39	NA	NA	0	1	0.7243	0.0703	0.0448637	0.133623	0.0186979	0.954926
ALDH3A2-ES-39753	ID_39753	ALDH3A2	ES	11	10	12	0	0.7793	0.756	0.0856	0.0448841	19.4084	1.07003	352.035
VDAC1-AP-73334	ID_73334	VDAC1	AP	2	NA	NA	0	0.9931	1	0.191	0.045151	3.58853	1.02799	12.5269
VDAC1-AP-73335	ID_73335	VDAC1	AP	1	NA	NA	0	0.9931	1	0.191	0.0451524	0.278668	0.0798289	0.972779
SEC31A-ES-69728	ID_69728	SEC31A	ES	26.2:27	26.1	28	0	0.9672	1	0.2449	0.0451954	0.407426	0.169217	0.980965
OGFOD2-ES-25016	ID_25016	OGFOD2	ES	4	3	5.2	0	0.8362	0.7108	0.0697	0.045198	12.9683	1.05635	159.207
SPG21-AP-31149	ID_31149	SPG21	AP	4.1	NA	NA	0	1	1	0.2645	0.045201	2.11986	1.01619	4.4222
LSR-ES-49087	ID_49087	LSR	ES	4	3	5	0	0.9793	0.6825	0.0911	0.0452131	8.8131	1.0475	74.1489
ECHDC2-ES-3033	ID_3033	ECHDC2	ES	5.1:6.1	2.1	6.2	0	0.869	1	0.2093	0.0452275	2.69814	1.02132	7.12797
ERICH1-AT-82553	ID_82553	ERICH1	AT	6	NA	NA	0	0.9983	0.9151	0.1607	0.0452457	4.5505	1.0326	20.0532
ERICH1-AT-82554	ID_82554	ERICH1	AT	7	NA	NA	0	0.9983	0.9151	0.1607	0.0452476	0.21976	0.0498683	0.968438
LRRC23-AT-19998	ID_19998	LRRC23	AT	7.2	NA	NA	0	1	0.6315	0.0966	0.0452525	6.30845	1.03971	38.2765
LRRC23-AT-20000	ID_20000	LRRC23	AT	10	NA	NA	0	1	0.6315	0.0966	0.0452606	0.158526	0.0261268	0.961871
REC8-RI-26881	ID_26881	REC8	RI	1.2	1.1	1.3	0	0.8534	0.97	0.1645	0.0454789	0.192995	0.0385004	0.96745
CPNE1-ES-59198	ID_59198	CPNE1	ES	1.2:2.1:2.2:3	1.1	5	0	0.9586	0.9426	0.1901	0.0455487	0.309371	0.0979598	0.97704
POLR2F-AT-62180	ID_62180	POLR2F	AT	5	NA	NA	0	1	0.8608	0.1563	0.0455779	0.291423	0.087012	0.976044
PPP1R32-AP-16238	ID_16238	PPP1R32	AP	1	NA	NA	0	0.7707	0.9652	0.273	0.0456713	0.369295	0.139018	0.981014
EPN1-AP-52137	ID_52137	EPN1	AP	2	NA	NA	0	0.9724	0.9714	0.1114	0.0458875	4.54003	1.02802	20.0501
EPN1-AP-52136	ID_52136	EPN1	AP	1	NA	NA	0	0.9724	0.9714	0.1114	0.0458884	0.220264	0.0498752	0.972752
TMEM107-ES-39127	ID_39127	TMEM107	ES	2:3.2:3.4:3.5:3.6	1	3.7	0	0.75	1	0.2035	0.0459019	2.87094	1.01938	8.08561
ACSF3-ES-38064	ID_38064	ACSF3	ES	0.00142593	1.1	4	0	0.931	0.5896	0.0322	0.0459119	0.0498164	0.00262054	0.947006
GLI4-AT-85406	ID_85406	GLI4	AT	3.4	NA	NA	0	1	0.8208	0.0848	0.0459695	7.40904	1.03648	52.9616
GLI4-AT-85405	ID_85405	GLI4	AT	4	NA	NA	0	1	0.8208	0.0848	0.0459731	0.134974	0.0188819	0.964831
MLST8-AA-33227	ID_33227	MLST8	AA	4.1	3.2	4.2	0	0.9586	0.5052	0.0474	0.0459892	0.029466	0.000924472	0.939177
LRRFIP2-ES-63960	ID_63960	LRRFIP2	ES	20	19	21	0	0.8845	1	0.2271	0.0460146	3.04689	1.0199	9.10239
NET1-AP-10659	ID_10659	NET1	AP	1	NA	NA	0	0.9379	1	0.1363	0.046159	3.86356	1.0233	14.5873
NET1-AP-10660	ID_10660	NET1	AP	5	NA	NA	0	0.9379	1	0.1363	0.046159	0.258829	0.068553	0.977235
SCRN2-RI-42120	ID_42120	SCRN2	RI	7.2	7.1	7.3	0	1	0.9384	0.1507	0.0462169	3.71949	1.02228	13.5331
SLC35A5-AP-66110	ID_66110	SLC35A5	AP	3	NA	NA	0	0.7707	1	0.1998	0.0462352	2.63491	1.01631	6.83134
SLC35A5-AP-66109	ID_66109	SLC35A5	AP	1	NA	NA	0	0.7707	1	0.1998	0.0462353	0.37952	0.146384	0.983956
YY1AP1-AP-8095	ID_8095	YY1AP1	AP	3.1	NA	NA	0	0.7983	0.9639	0.1564	0.0463146	4.25913	1.02395	17.7158
GABARAP-AD-38867	ID_38867	GABARAP	AD	1.2:1.3:1.4:1.5	1.1	2.1	0	0.981	0.8891	0.1658	0.0464274	0.235841	0.0569077	0.977393
MARK2-ES-16543	ID_16543	MARK2	ES	18	17	19	0	0.9138	0.7363	0.1072	0.0464622	5.70198	1.02766	31.6376
TPD52L1-ES-77416	ID_77416	TPD52L1	ES	0.00566088	6	10	0	0.9759	0.961	0.1644	0.0466356	3.82351	1.02017	14.3301
RAP1A-AP-4176	ID_4176	RAP1A	AP	3	NA	NA	0	0.769	0.6214	0.0945	0.0466364	9.1032	1.03343	80.1874
GMPR2-RI-26927	ID_26927	GMPR2	RI	2.2	2.1	2.3	0	0.869	0.9373	0.1721	0.046659	0.279191	0.079432	0.98131
TMEM91-RI-50058	ID_50058	TMEM91	RI	7.2:7.3:7.4	7.1	7.5	0	0.9776	0.9444	0.2156	0.0466793	2.61438	1.01422	6.73915
SUOX-ES-22340	ID_22340	SUOX	ES	3	2	5.2	0	0.8086	0.9538	0.2619	0.0467025	2.50728	1.0135	6.20269
C1orf122-AD-1842	ID_1842	C1orf122	AD	1.2	1.1	1.4	0	0.8793	0.6016	0.0713	0.046902	0.0119671	0.000152161	0.94118
RBM23-ES-26652	ID_26652	RBM23	ES	6	5	7	0	0.9172	0.7432	0.1311	0.0469225	6.59686	1.026	42.4157
AMDHD2-RI-33282	ID_33282	AMDHD2	RI	8.2	8.1	8.3	0	0.9586	1	0.1255	0.0469982	0.182186	0.03395	0.977663
OAS3-AT-24605	ID_24605	OAS3	AT	16	NA	NA	0	1	0.9215	0.1155	0.047009	0.22498	0.0516241	0.980474
CDK16-AP-88911	ID_88911	CDK16	AP	1	NA	NA	0	0.9569	1	0.1537	0.0470497	4.12679	1.01865	16.7186
SPATA6L-AT-85752	ID_85752	SPATA6L	AT	19	NA	NA	0	0.8552	1	0.2532	0.0470626	2.32737	1.01102	5.35757
DIABLO-ES-24935	ID_24935	DIABLO	ES	3	2.4	4	0	0.9914	0.8065	0.0429	0.047072	4706.02	1.11561	1.98516e+07
DAGLB-AD-78725	ID_78725	DAGLB	AD	12.3	12.2	13	0	0.7776	1	0.2368	0.0471479	2.53558	1.01179	6.35426
PPP2R4-ES-87857	ID_87857	PPP2R4	ES	0.170139	3.1	6	0	0.7724	0.6959	0.1178	0.0472984	0.140432	0.0201883	0.976863
ADAM15-ES-7903	ID_7903	ADAM15	ES	21.1:21.2:22.1	20	23	0	0.9966	0.9231	0.1905	0.0474458	3.16237	1.01306	9.87167
MECOM-AA-67573	ID_67573	MECOM	AA	12.1	11	12.2	0	0.8	0.8286	0.1256	0.0474651	0.148682	0.0225826	0.978915
NDE1-AT-34184	ID_34184	NDE1	AT	12	NA	NA	0	1	0.8322	0.1524	0.0475981	4.25298	1.01545	17.8127
NDE1-AT-34185	ID_34185	NDE1	AT	13	NA	NA	0	1	0.8322	0.1524	0.0476045	0.235139	0.0561419	0.98483
ARL6IP4-AA-25031	ID_25031	ARL6IP4	AA	3.1	2.1	3.2	0	0.9948	0.6785	0.0907	0.0476636	0.0836282	0.00717467	0.974773
DNAH14-AT-9969	ID_9969	DNAH14	AT	9	NA	NA	0	0.8466	1	0.2544	0.0478859	2.27582	1.00768	5.13985
TRIM11-AP-10206	ID_10206	TRIM11	AP	2.1	NA	NA	0	0.9966	0.9899	0.1355	0.0478947	3.46926	1.0116	11.8978
TRIM11-AP-10207	ID_10207	TRIM11	AP	1	NA	NA	0	0.9966	0.9899	0.1355	0.0478993	0.288252	0.0840508	0.988561
PSMG3-AP-78589	ID_78589	PSMG3	AP	1	NA	NA	0	1	0.9044	0.1019	0.048035	4.15006	1.01238	17.0123
JAM2-AT-60253	ID_60253	JAM2	AT	12	NA	NA	0	0.9983	0.791	0.2115	0.0481228	0.384828	0.149265	0.992146
JAM2-AT-60254	ID_60254	JAM2	AT	11	NA	NA	0	0.9983	0.791	0.2115	0.048123	2.59855	1.00792	6.69945
EXD3-AT-88298	ID_88298	EXD3	AT	27	NA	NA	0	1	0.8307	0.1933	0.0482441	0.329946	0.1098	0.991477
PRDM2-ES-723	ID_723	PRDM2	ES	10	9	12	0	0.8	0.9654	0.204	0.0482553	0.37422	0.1411	0.992489
CMC2-AP-37703	ID_37703	CMC2	AP	1	NA	NA	0	0.9983	0.9254	0.1392	0.0483546	3.57955	1.00926	12.6956
CCDC65-AT-21490	ID_21490	CCDC65	AT	9	NA	NA	0	0.9397	1	0.3178	0.0484608	1.92078	1.00442	3.67313
CCDC65-AT-21489	ID_21489	CCDC65	AT	8.2	NA	NA	0	0.9397	1	0.3178	0.0484629	0.520627	0.27225	0.995603
ZNF169-AT-86925	ID_86925	ZNF169	AT	5	NA	NA	0	0.9931	0.6592	0.1512	0.0485033	3.78153	1.00878	14.1755
MRPL52-ES-26637	ID_26637	MRPL52	ES	4.1:4.2	2	5	0	0.9138	1	0.158	0.0485244	3.77404	1.00864	14.1214
NMRK1-ES-86630	ID_86630	NMRK1	ES	3	2	4	0	0.9603	0.8883	0.1669	0.0486012	0.282068	0.0801833	0.992258
FAM211B-ES-61457	ID_61457	FAM211B	ES	4	3	5	0	0.9948	0.6775	0.1378	0.0486078	0.241033	0.0586043	0.991342
MCF2L2-AT-67796	ID_67796	MCF2L2	AT	16	NA	NA	0	0.9897	0.9597	0.1265	0.0486243	0.234824	0.0556271	0.991289
ZNF525-AA-51713	ID_51713	ZNF525	AA	6.1	4	6.2	0	0.9983	0.5596	0.0894	0.0486481	0.129788	0.0170503	0.987958
SDC3-RI-1436	ID_1436	SDC3	RI	2.2	2.1	2.3	0	0.769	1	0.1043	0.0486964	5.48905	1.00979	29.8376
USP5-AD-19988	ID_19988	USP5	AD	15.2	15.1	16	0	0.9793	0.5285	0.0741	0.0487284	10.801	1.01337	115.123
DCN-AT-23652	ID_23652	DCN	AT	12	NA	NA	0	0.9966	0.8672	0.0608	0.0487316	0.136884	0.0189456	0.988994
U2AF1-ES-60778	ID_60778	U2AF1	ES	4	3	5	0	0.9966	0.6393	0.0861	0.0489243	7.70738	1.00968	58.8344
SYNE1-AT-78178	ID_78178	SYNE1	AT	29.2	NA	NA	0	1	0.5619	0.0301	0.0489875	6.57e-19	5.2e-37	0.830452
IL1RAP-AT-68107	ID_68107	IL1RAP	AT	13	NA	NA	0	0.9948	0.9527	0.1458	0.0490068	0.291609	0.0854931	0.99465
ST7L-AT-4207	ID_4207	ST7L	AT	16.2	NA	NA	0	1	0.8207	0.1333	0.0490751	4.59495	1.0062	20.9835
ST7L-AT-4205	ID_4205	ST7L	AT	18	NA	NA	0	1	0.8207	0.1333	0.0490753	0.217631	0.0476566	0.993841
SHISA9-AT-34062	ID_34062	SHISA9	AT	2	NA	NA	0	1	0.5087	0.0861	0.049231	7.27679	1.0067	52.599
SHISA9-AT-34063	ID_34063	SHISA9	AT	6	NA	NA	0	1	0.5087	0.0861	0.049231	0.137423	0.0190118	0.99334
TMEM43-ES-63521	ID_63521	TMEM43	ES	2	1	3	0	0.7862	1	0.1447	0.0492956	2.93354	1.00332	8.57717
FDPS-ES-8071	ID_8071	FDPS	ES	1.2:2:3.1	1.1	3.2	0	0.9534	0.5407	0.0799	0.0493602	8.59815	1.00604	73.4841
KRBOX4-AT-88886	ID_88886	KRBOX4	AT	8.2	NA	NA	0	1	0.6186	0.0756	0.0494622	0.0885772	0.00789078	0.994314
FAM227A-RI-62247	ID_62247	FAM227A	RI	17.2	17.1	17.3	0	0.9879	0.6751	0.1097	0.0495374	9.80052	1.00463	95.6077
DDB1-AP-16154	ID_16154	DDB1	AP	26.1	NA	NA	0	0.9276	0.5206	0.0865	0.0495964	8.04837	1.00369	64.5383
MRPL55-AA-10093	ID_10093	MRPL55	AA	2.8	2.2	2.9	0	0.9897	0.7451	0.0665	0.0497677	21.3012	1.00311	452.335
B3GNTL1-AP-44425	ID_44425	B3GNTL1	AP	7	NA	NA	0	0.8069	0.7087	0.0794	0.0499122	0.0120156	0.00014462	0.998306
NPIPB4-RI-34760	ID_34760	NPIPB4	RI	9.8	9.7	9.9	0	0.781	1	0.1742	0.0499188	4.15397	1.00051	17.2467
RANBP1-RI-61138	ID_61138	RANBP1	RI	7.2:7.3	7.1	7.4	0	1	0.7031	0.0737	0.0499567	0.0206658	0.000427388	0.999268
DCN-AT-23655	ID_23655	DCN	AT	6	NA	NA	0	0.9966	0.8672	0.06	0.0499769	7.21522	1.0002	52.049
