# Supplementary material for: Whole Genome Analysis and Prognostic Model Construction Based on Alternative Splicing Events in Endometrial Cancer
Source: Biomed Res Int. 2019 Jul 2;2019:2686875. doi: 10.1155/2019/2686875 (PMC6634061; doi:10.1155/2019/2686875)
Supplement: Supplementary 4 — Table S3. GO (BP/CC/MF) and KEGG pathway enrichment using the DAVID database. [file 2686875.f4.xlsx]

## Sheet: Sheet1
Category	Term	Count	%	PValue	Genes	List Total	Pop Hits	Pop Total	Fold Enrichment	Bonferroni	Benjamini	FDR
GOTERM_BP_DIRECT	GO:0000086~G2/M transition of mitotic cell cycle	11	0.0175828	0.000614	HAUS4, CSNK1E, NEK2, CEP76, TPX2, PKMYT1, BIRC5, CHEK1, CEP63, CDK2, CEP70	352	137	16792	3.83029	0.645106	0.645106	1.02946
GOTERM_BP_DIRECT	GO:0007067~mitotic nuclear division	15	0.0239766	0.000755	HAUS4, ITGB3BP, TADA2A, NEK2, TPX2, PKMYT1, BIRC5, ANAPC11, CEP63, CDK2, RBBP8, SRSF2, INCENP, KIF20B, STAG2	352	248	16792	2.88536	0.720528	0.471349	1.26538
GOTERM_BP_DIRECT	GO:0006412~translation	14	0.0223782	0.00265688	RPL19, RRBP1, MRPS12, RPL29, MRPL23, RPL30, MRPL28, RPS3A, RPLP0, RPL34, SLC25A35, SLC25A29, MRPL55, RPS24	352	253	16792	2.63978	0.988758	0.775985	4.38418
GOTERM_BP_DIRECT	GO:0006915~apoptotic process	23	0.0367641	0.00412834	ITGB3BP, RNF144B, SGK1, TPX2, PRDX5, BIRC5, SAP30BP, RASSF7, BCL2L12, DNASE1, RABEP1, TIA1, BCAP29, IRF3, SIAH1, UNC5C, APIP, PDCD5, MAP2K6, PUF60, AXIN1, ERCC2, ADAM15	352	567	16792	1.93511	0.999069	0.825308	6.7338
GOTERM_BP_DIRECT	GO:0098609~cell-cell adhesion	14	0.0223782	0.00475246	CAST, ATXN2L, STXBP6, SH3GLB2, SERBP1, IST1, EIF4H, RPL34, NUMB, SLC3A2, EPS15L1, DNAJB1, PUF60, RPL29	352	271	16792	2.46444	0.999677	0.799572	7.71389
GOTERM_BP_DIRECT	GO:0019083~viral transcription	8	0.0127875	0.00915303	RPL30, RPL19, RPS3A, RPLP0, RPL34, NUPL2, RPL29, RPS24	352	112	16792	3.40747	1	0.924632	14.3543
GOTERM_BP_DIRECT	GO:0000184~nuclear-transcribed mRNA catabolic process, nonsense-mediated decay	8	0.0127875	0.0125202	RPL30, RPL19, RPS3A, RPLP0, RPL34, RNPS1, RPL29, RPS24	352	119	16792	3.20703	1	0.951993	19.129
GOTERM_BP_DIRECT	GO:0006614~SRP-dependent cotranslational protein targeting to membrane	7	0.0111891	0.0139713	RPL30, RPL19, RPS3A, RPLP0, RPL34, RPL29, RPS24	352	94	16792	3.55247	1	0.948541	21.1084
GOTERM_BP_DIRECT	GO:0010212~response to ionizing radiation	5	0.0079922	0.0189993	RFWD2, RAD51C, NABP2, INIP, RRM1	352	49	16792	4.86781	1	0.972555	27.6204
GOTERM_BP_DIRECT	GO:0042770~signal transduction in response to DNA damage	3	0.00479532	0.0211541	PGAP2, GRB2, CEP63	352	11	16792	13.0103	1	0.972867	30.2534
GOTERM_BP_DIRECT	GO:0008380~RNA splicing	9	0.014386	0.0235832	SRSF2, PPP4R2, SON, AKAP17A, SNRNP40, RNPS1, HNRNPC, THOC3, PUF60	352	166	16792	2.58639	1	0.974271	33.1135
GOTERM_BP_DIRECT	GO:0043065~positive regulation of apoptotic process	13	0.0207797	0.0243433	ITGB3BP, RNPS1, MCF2L, SCRIB, CTNNB1, ARHGEF11, PSEN1, SIAH1, UNC5C, HSPD1, PDCD5, MAP2K6, IP6K2	352	300	16792	2.0672	1	0.968715	33.9854
GOTERM_BP_DIRECT	GO:0009650~UV protection	3	0.00479532	0.0250387	MC1R, ERCC1, ERCC2	352	12	16792	11.9261	1	0.962769	34.7738
GOTERM_BP_DIRECT	GO:0006413~translational initiation	8	0.0127875	0.0251207	RPL30, RPL19, RPS3A, RPLP0, EIF4H, RPL34, RPL29, RPS24	352	137	16792	2.78567	1	0.953379	34.8662
GOTERM_BP_DIRECT	GO:0006281~DNA repair	11	0.0175828	0.0263629	RAD51C, NABP2, RPAIN, CSNK1E, INIP, CHEK1, KIN, RBM14-RBM4, ERCC1, CDK2, RBBP8	352	235	16792	2.23298	1	0.950448	36.2508
GOTERM_BP_DIRECT	GO:2000060~positive regulation of protein ubiquitination involved in ubiquitin-dependent protein catabolic process	3	0.00479532	0.0382319	PTK2, DISC1, AXIN1	352	15	16792	9.54091	1	0.983595	48.1544
GOTERM_BP_DIRECT	GO:0050427~3'-phosphoadenosine 5'-phosphosulfate metabolic process	3	0.00479532	0.0382319	SULT1A3, ABHD14B, SULT1A4	352	15	16792	9.54091	1	0.983595	48.1544
GOTERM_BP_DIRECT	GO:0090307~mitotic spindle assembly	4	0.00639376	0.0388961	NEK2, TPX2, BIRC5, TUBGCP2	352	36	16792	5.30051	1	0.980492	48.7545
GOTERM_BP_DIRECT	GO:0006260~DNA replication	8	0.0127875	0.0444704	RRM1, CHEK1, NFIC, KIN, RBM14-RBM4, CDK2, REPIN1, RBBP8	352	155	16792	2.46217	1	0.985925	53.5393
GOTERM_CC_DIRECT	GO:0005829~cytosol	110	0.175828	1.6e-07	ITGB3BP, CAST, RNASEL, RPL19, CEP76, TIRAP, PKMYT1, APOBEC3G, CEP70, CTNNB1, HOOK2, RPLP0, INCENP, PSIP1, SULT1A3, SULT1A4, SAR1B, STAG2, MAP2K6, NUPL2, TRIM37, PLCE1, FBXL8, MYL6, CHMP2A, EEF1B2, GRB2, NEK2, ARFRP1, CHEK1, ANAPC11, ASL, PTK2, UBE2D2, NMRAL1, TCTN1, HNRNPC, RPS24, AXIN1, SREBF1, S100A16, AGBL5, RNPS1, ABHD14B, EVL, AK7, EIF4H, RAP1A, RHOT2, GRK4, DNAJB1, HSPD1, PDCD5, CRYZL1, UBE…	377	3315	18224	1.60403	6.05e-05	6.05e-05	0.000221
GOTERM_CC_DIRECT	GO:0005654~nucleoplasm	93	0.148655	1.77e-06	ITGB3BP, CREBRF, RAD51C, CDC14A, YLPM1, TIRAP, PKMYT1, MED24, COPS8, CTNNB1, CEP70, MAX, AKAP17A, HSF1, RPS3A, INCENP, TIA1, PSIP1, STAG2, MAP2K6, BRD8, IP6K2, C16ORF46, PRKCA, SGK1, ESR1, TPX2, SIX5, BANP, STXBP4, NUPL2, HMGA1, CDK2, RBBP8, EPB41L2, RFWD2, SMTN, NABP2, IPO7, RRM1, TFAP2A, CPSF6, SNRNP40, CARM1, THOC3, KDM6B, PMEPA1, PPP4R2, GRB2, TFE3, CHEK1, EHF, ANAPC11, ZBTB17, ZNF175, SCRIB,…	377	2784	18224	1.61479	0.000669	0.000335	0.00244973
GOTERM_CC_DIRECT	GO:0005737~cytoplasm	147	0.234971	1.14e-05	CAST, ITGB3BP, RAD51C, RPL19, TIRAP, APOBEC3G, KIAA1456, CEP70, CTNNB1, ANKRD54, IFT122, AKAP17A, RPLP0, TIA1, SULT1A3, SULT1A4, MAP2K6, STRN4, SIX5, NUPL2, TACC2, TRIM37, PLCE1, RPAIN, NABP2, FAM72A, SERBP1, IQCG, TFAP2A, EEF1B2, DBNDD2, GRB2, NEK2, TFE3, CDC42SE1, ASL, SCRIB, PDSS2, PTK2, TRMT44, NMRAL1, TRO, PPIL4, SCARB1, MFAP3L, FGD5, RPS24, AXIN1, SREBF1, UBXN11, S100A16, TTC21B, AGBL5, ARM…	377	5222	18224	1.36076	0.00429128	0.00143248	0.0157368
GOTERM_CC_DIRECT	GO:0005634~nucleus	143	0.228577	0.000436	ITGB3BP, RAD51C, MED24, KIAA1456, CTNNB1, APOBEC3B, ANKRD54, AKAP17A, RPLP0, PSIP1, CREB3L4, PDHA1, DISC1, STAG2, PMS1, ZNF101, TADA2A, SIX5, HDAC11, NUPL2, BCL2L12, TACC2, RPAIN, NABP2, SERBP1, ZNF384, TFAP2A, ZNF586, EEF1B2, GRB2, NEK2, TFE3, CHEK1, ZNF846, PTK2, NMRAL1, TRO, NUMB, HNRNPC, MFAP3L, RPS24, AXIN1, SREBF1, ABCB8, INIP, AGBL5, ARMC3, RNPS1, ABHD14B, HN1L, SRSF2, DNASE1, YY1AP1, ARMC…	377	5415	18224	1.27656	0.151867	0.0403431	0.600984
GOTERM_CC_DIRECT	GO:0030529~intracellular ribonucleoprotein complex	10	0.0159844	0.00206826	CSNK1E, RPS3A, HNRNPUL1, RPLP0, CPSF6, APOBEC3G, HNRNPC, ZCCHC17, PUF60, RBM14-RBM4	377	136	18224	3.55438	0.54279	0.144888	2.82341
GOTERM_CC_DIRECT	GO:0005913~cell-cell adherens junction	16	0.025575	0.00302859	CAST, SLC3A2, EPS15L1, SCRIB, RPL29, CTNNB1, ATXN2L, STXBP6, SH3GLB2, RPL34, EIF4H, IST1, SERBP1, NUMB, DNAJB1, PUF60	377	323	18224	2.39453	0.682267	0.173942	4.10906
GOTERM_CC_DIRECT	GO:0016607~nuclear speck	12	0.0191813	0.00313467	RFWD2, SRSF2, SF3B1, SON, AKAP17A, ATXN2L, YLPM1, RNPS1, WAC, U2AF1L4, MBD1, THOC3	377	201	18224	2.88594	0.694793	0.155945	4.25009
GOTERM_CC_DIRECT	GO:0005813~centrosome	19	0.0303704	0.0034246	HAUS4, PPP4R2, CDC14A, NEK2, CEP76, CHEK1, CEP63, TUBGCP2, CDK2, CEP70, CTNNB1, RFWD2, ODF2L, HOOK2, PSEN1, IST1, KIF20B, TFAP2A, DISC1	377	426	18224	2.15599	0.726573	0.149635	4.63461
GOTERM_CC_DIRECT	GO:0045111~intermediate filament cytoskeleton	6	0.00959064	0.00427224	SAP30BP, STXBP4, ZCCHC17, ZNF175, STAG2, IP6K2	377	52	18224	5.57764	0.801778	0.164578	5.75056
GOTERM_CC_DIRECT	GO:0005743~mitochondrial inner membrane	19	0.0303704	0.0047454	ATP5D, NDUFA3, ABCB8, COX10, MRPS12, SIRT5, COX6C, COQ4, MRPL23, MRPL28, PSEN1, MCCC1, SLC25A35, SLC25A29, CSDE1, MRPL55, LETMD1, HSPD1, MRPL33	377	441	18224	2.08266	0.834375	0.164565	6.36821
GOTERM_CC_DIRECT	GO:0048471~perinuclear region of cytoplasm	24	0.0383626	0.00519075	PRKCA, DYNC1I1, RAD51C, PTOV1, DMTN, PAM, MLPH, ALG2, PRDX5, COPS8, PI4KB, GLB1, CTNNB1, TRIM37, APOD, ATP9B, SERBP1, NMRAL1, EIF4H, KIF20B, RAP1A, GNAS, DISC1, AXIN1	377	621	18224	1.86819	0.860154	0.163758	6.94613
GOTERM_CC_DIRECT	GO:0019907~cyclin-dependent protein kinase activating kinase holoenzyme complex	3	0.00479532	0.00602801	HSPD1, PUF60, ERCC2	377	6	18224	24.1698	0.898275	0.173419	8.02367
GOTERM_CC_DIRECT	GO:0031528~microvillus membrane	4	0.00639376	0.0066049	PROM1, PROM2, SCARB1, CTNNB1	377	19	18224	10.1767	0.918319	0.17526	8.75937
GOTERM_CC_DIRECT	GO:0005840~ribosome	10	0.0159844	0.00765819	MRPL23, RPL30, RPL19, RPS3A, RRBP1, RPLP0, RPL34, MRPL55, RPL29, RPS24	377	166	18224	2.91202	0.945302	0.187441	10.0886
GOTERM_CC_DIRECT	GO:0022625~cytosolic large ribosomal subunit	6	0.00959064	0.0131287	RPL30, RPL19, RPLP0, RPL34, ZCCHC17, RPL29	377	68	18224	4.26525	0.993232	0.283254	16.7077
GOTERM_CC_DIRECT	GO:0000922~spindle pole	7	0.0111891	0.0254665	DYNC1I1, CDC14A, NEK2, TPX2, CEP63, TUBGCP2, CTNNB1	377	109	18224	3.10437	0.999942	0.456345	30.012
GOTERM_CC_DIRECT	GO:0030877~beta-catenin destruction complex	3	0.00479532	0.0328001	SIAH1, CTNNB1, AXIN1	377	14	18224	10.3585	0.999997	0.523624	36.956
GOTERM_CC_DIRECT	GO:0000777~condensed chromosome kinetochore	6	0.00959064	0.0340294	ITGB3BP, DYNC1I1, CENPM, NEK2, INCENP, BIRC5	377	87	18224	3.33376	0.999998	0.516672	38.0555
GOTERM_CC_DIRECT	GO:0034750~Scrib-APC-beta-catenin complex	2	0.00319688	0.0408397	SCRIB, CTNNB1	377	2	18224	48.3395	1	0.563755	43.8309
GOTERM_CC_DIRECT	GO:0005856~cytoskeleton	14	0.0223782	0.0448825	UBXN11, PARD3, DNAH9, TTC21B, CDC42SE1, EVL, ARHGAP39, TPM4, EPB41L2, PTK2, SMTN, TCTN1, FGD5, MAP2K6	377	371	18224	1.82413	1	0.58017	47.0188
GOTERM_CC_DIRECT	GO:0005681~spliceosomal complex	6	0.00959064	0.045089	SRSF2, SF3B1, AKAP17A, WAC, HNRNPC, U2AF1L4	377	94	18224	3.0855	1	0.564155	47.177
GOTERM_MF_DIRECT	GO:0005515~protein binding	235	0.375633	6.57e-07	ITGB3BP, RAD51C, RARRES2, RPL19, MED24, CTNNB1, HOOK2, MC1R, APOD, INCENP, RPLP0, SULT1A3, MAP2K6, STAG2, C15ORF57, ZNF101, TADA2A, STRN4, PTPRS, MAGED2, WDR90, YIF1A, FBXL8, SERBP1, CD33, DBNDD2, NEK2, CHEK1, ASL, SCRIB, LETMD1, BMP1, S100A16, C22ORF39, INIP, ATP13A2, SRSF2, YY1AP1, RABEP1, C11ORF49, RWDD1, POP5, CREBRF, MLH3, RASSF7, COPS8, FBXL19, TRAPPC6A, C4ORF33, HSF1, MCCC1, SLMAP, GKAP1, …	363	8785	16881	1.24399	0.000354	0.000354	0.000956
GOTERM_MF_DIRECT	GO:0044822~poly(A) RNA binding	46	0.0735282	4.25e-05	CAST, RPL19, GRB2, MRPS12, YLPM1, APOBEC3B, SF3B1, RPL30, AKAP17A, ATXN2L, RPS3A, RPLP0, TIA1, PSIP1, CSDE1, PPIL4, HNRNPC, NSUN5, MEPCE, NFX1, RPS24, ARHGEF1, S100A16, RRBP1, PPHLN1, SLC3A2, RNPS1, ANKHD1, NUPL2, ZCCHC17, RPL29, SRSF2, SON, MRPL28, CSNK1E, HNRNPUL1, SERBP1, EIF4H, CPSF6, CIRBP, ZC3H11A, SNRNP40, HSPD1, RBM14-RBM4, PUF60, REPIN1	363	1129	16881	1.89477	0.0226182	0.0113738	0.0618477
GOTERM_MF_DIRECT	GO:0003735~structural constituent of ribosome	14	0.0223782	0.00104064	RPL19, MRPS12, RPL29, MRPL23, RPL30, MRPL28, RPS3A, RPLP0, RPL34, SLC25A35, SLC25A29, MRPL55, MRPL33, RPS24	363	222	16881	2.93269	0.428879	0.170322	1.50336
GOTERM_MF_DIRECT	GO:0098641~cadherin binding involved in cell-cell adhesion	16	0.025575	0.00154955	CAST, SLC3A2, EPS15L1, SCRIB, RPL29, CTNNB1, ATXN2L, STXBP6, SH3GLB2, RPL34, EIF4H, IST1, SERBP1, NUMB, DNAJB1, PUF60	363	290	16881	2.56575	0.565823	0.18826	2.23087
GOTERM_MF_DIRECT	GO:0003723~RNA binding	23	0.0367641	0.00372179	RNASEL, RPL19, RBM43, APOBEC3G, RNPS1, ANKHD1, KIN, U2AF1L4, RPL29, MRPL23, RPL30, SON, RPS3A, HNRNPUL1, RPL34, EIF4H, TIA1, DDX59, CIRBP, CPSF6, HNRNPC, THOC3, RBM14-RBM4	363	547	16881	1.95538	0.865483	0.330492	5.2803
GOTERM_MF_DIRECT	GO:0000166~nucleotide binding	16	0.025575	0.00837381	RBM43, RNPS1, U2AF1L4, ATP13A2, SRSF2, MRPL23, AKAP17A, EIF4H, TIA1, PPIL4, CIRBP, CPSF6, HNRNPC, RBM14-RBM4, PUF60, RPS24	363	348	16881	2.13812	0.989155	0.529525	11.5153
GOTERM_MF_DIRECT	GO:0003697~single-stranded DNA binding	7	0.0111891	0.0149276	RAD51C, SSBP4, NABP2, HSPD1, MLH3, PMS1, ERCC1	363	93	16881	3.50031	0.999694	0.685239	19.6529
GOTERM_MF_DIRECT	GO:0003712~transcription cofactor activity	6	0.00959064	0.0181145	MAX, TADA2A, SUPT20H, PHF21A, MED24, IRF3	363	71	16881	3.92993	0.999946	0.707522	23.3529
GOTERM_MF_DIRECT	GO:0003730~mRNA 3'-UTR binding	5	0.0079922	0.0206559	SERBP1, CIRBP, RNPS1, HNRNPC, AUH	363	49	16881	4.74532	0.999987	0.712834	26.1891
GOTERM_MF_DIRECT	GO:0005524~ATP binding	44	0.0703314	0.0293144	ATP5D, RAD51C, RNASEL, DNAH9, C12ORF76, NEK2, PKMYT1, CHEK1, MLH3, STK32C, PTK2, UBE2D2, MCCC1, PMS1, ATP8B3, MAP2K6, SIK3, IP6K2, AASDH, ERCC2, PRKCA, SGK1, ABCB8, TPX2, NADK, PI4KB, DGUOK, AK7, ATP13A2, CDK2, PANK2, CSNK1E, ATP9B, FYN, DYRK1B, DDX59, RRM1, KIF20B, GRK4, HSPD1, KATNAL2, UBE2E1, CBWD5, TRIT1	363	1495	16881	1.36868	1	0.798243	35.135
GOTERM_MF_DIRECT	GO:0008013~beta-catenin binding	6	0.00959064	0.0314515	PSEN1, NUMB, ESR1, CARM1, KDM6B, AXIN1	363	82	16881	3.40274	1	0.790488	37.182
GOTERM_MF_DIRECT	GO:0003682~chromatin binding	15	0.0239766	0.0429923	SREBF1, PAM, TADA2A, ESR1, MLH3, MBD1, HMGA1, TRIM37, PSIP1, TFAP2A, PHF21A, WAC, PHF8, KDM6B, BAHD1	363	391	16881	1.78405	1	0.860564	47.2351
KEGG_PATHWAY	hsa03010:Ribosome	11	0.0175828	0.000423	MRPL23, RPL30, RPL19, MRPL28, RPS3A, RPLP0, MRPS12, RPL34, MRPL33, RPL29, RPS24	141	136	6879	3.94603	0.0808177	0.0808177	0.528938
KEGG_PATHWAY	hsa04110:Cell cycle	7	0.0111891	0.0403732	CDC14A, PKMYT1, CHEK1, ANAPC11, ZBTB17, CDK2, STAG2	141	124	6879	2.75412	0.999726	0.983435	40.3163
