# Supplementary material for: Whole Genome Analysis and Prognostic Model Construction Based on Alternative Splicing Events in Endometrial Cancer
Source: Biomed Res Int. 2019 Jul 2;2019:2686875. doi: 10.1155/2019/2686875 (PMC6634061; doi:10.1155/2019/2686875)
Supplement: Supplementary 5 — Table S4. 10 prognosis-associated splicing factors in EC. [file 2686875.f5.xlsx]

## Sheet: Sheet1
gene symbol	P value	HR	Low 95%CI	High 95%CI
FMR1	0.00480246	1.60289	1.15476	2.22494
SRSF4	0.00913506	0.492076	0.288733	0.838627
PCBP2	0.0123865	1.73407	1.12645	2.66946
PTBP2	0.0136014	1.35046	1.06376	1.71444
HNRNPDL	0.0176499	0.550378	0.336087	0.901304
YBX1	0.0183953	1.60128	1.08264	2.36838
QKI	0.0319581	1.38799	1.02868	1.87281
RBM5	0.0360756	0.702394	0.504805	0.977322
HNRNPA1	0.0428102	0.675412	0.462016	0.987372
HNRNPF	0.0432071	0.662904	0.444994	0.987524
