# Supplementary material for: Whole Genome Analysis and Prognostic Model Construction Based on Alternative Splicing Events in Endometrial Cancer
Source: Biomed Res Int. 2019 Jul 2;2019:2686875. doi: 10.1155/2019/2686875 (PMC6634061; doi:10.1155/2019/2686875)
Supplement: Supplementary 6 — Table S5. Correlation matrix between PASEs and splicing factors. [file 2686875.f6.xlsx]

## Sheet: Sheet1
ID	gene name	Splicing Factor name	cor_Pvalue	cor_rho	cor
ID_43715	SEPT9	FMR1	0.00244447	0.151437	1
ID_43726	SEPT9	HNRNPF	0.000810462	0.166041	1
ID_43726	SEPT9	PCBP2	0.0262714	-0.114136	-1
ID_43726	SEPT9	RBM5	0.011084	0.129018	1
ID_43715	SEPT9	YBX1	0.00569722	0.139478	1
ID_82298	ABCB8	HNRNPDL	0.000217578	0.191528	1
ID_82298	ABCB8	HNRNPF	0.00111681	-0.170526	-1
ID_82298	ABCB8	SRSF4	0.0388387	0.112499	1
ID_65141	ABHD14B	HNRNPDL	0.0265618	0.113484	1
ID_65141	ABHD14B	SRSF4	0.0368794	0.107381	1
ID_41942	ACBD4	HNRNPA1	0.0129898	-0.123578	-1
ID_41941	ACBD4	HNRNPA1	0.0129898	0.123578	1
ID_41941	ACBD4	QKI	0.000584539	-0.166579	-1
ID_41942	ACBD4	QKI	0.000584539	0.166579	1
ID_7906	ADAM15	YBX1	0.00033907	0.173549	1
ID_74892	ADAMTS2	FMR1	0.00469418	-0.139561	-1
ID_74891	ADAMTS2	FMR1	0.00469418	0.139556	1
ID_74892	ADAMTS2	SRSF4	0.000640964	-0.16543	-1
ID_74891	ADAMTS2	SRSF4	0.000640964	0.165431	1
ID_52926	AGBL5	PCBP2	0.000172141	0.201186	1
ID_29200	AK7	FMR1	0.00140552	-0.159846	-1
ID_29201	AK7	FMR1	0.00140552	0.159846	1
ID_29201	AK7	HNRNPA1	0.0047389	-0.143079	-1
ID_29200	AK7	HNRNPA1	0.0047389	0.143079	1
ID_29201	AK7	HNRNPDL	0.0114807	-0.129201	-1
ID_29200	AK7	HNRNPDL	0.0114807	0.129201	1
ID_29201	AK7	HNRNPF	0.0126124	-0.127461	-1
ID_29200	AK7	HNRNPF	0.0126124	0.127461	1
ID_29200	AK7	PCBP2	0.0364799	-0.108659	-1
ID_29201	AK7	PCBP2	0.0364799	0.108659	1
ID_29200	AK7	PTBP2	0.0121807	-0.128072	-1
ID_29201	AK7	PTBP2	0.0121807	0.128072	1
ID_21067	ALG10B	FMR1	0.000342136	-0.174926	-1
ID_21068	ALG10B	FMR1	0.000342136	0.174926	1
ID_21068	ALG10B	HNRNPA1	0.0447177	-0.103087	-1
ID_21067	ALG10B	HNRNPA1	0.0447177	0.103087	1
ID_21067	ALG10B	HNRNPDL	0.00912476	-0.130999	-1
ID_21068	ALG10B	HNRNPDL	0.00912476	0.130999	1
ID_21067	ALG10B	PTBP2	0.0361066	-0.107185	-1
ID_21068	ALG10B	PTBP2	0.0361066	0.107185	1
ID_21067	ALG10B	QKI	0.00117561	-0.159739	-1
ID_21068	ALG10B	QKI	0.00117561	0.159739	1
ID_44211	ANAPC11	FMR1	0.00306931	0.145261	1
ID_44216	ANAPC11	FMR1	0.00115145	0.158801	1
ID_44208	ANAPC11	FMR1	0.000286693	0.177083	1
ID_44211	ANAPC11	HNRNPA1	0.0275503	-0.110966	-1
ID_44217	ANAPC11	HNRNPA1	0.0468867	-0.101199	-1
ID_44216	ANAPC11	HNRNPDL	0.0242867	0.113521	1
ID_44208	ANAPC11	HNRNPDL	0.0130197	0.12498	1
ID_44211	ANAPC11	HNRNPF	0.0477208	0.100735	1
ID_44217	ANAPC11	HNRNPF	0.0363327	0.105994	1
ID_44216	ANAPC11	HNRNPF	0.0084701	0.131159	1
ID_44211	ANAPC11	PCBP2	0.00336621	0.144046	1
ID_44208	ANAPC11	PTBP2	0.00522587	0.139505	1
ID_44208	ANAPC11	QKI	0.000525696	0.169843	1
ID_44216	ANAPC11	RBM5	0.00101235	-0.160431	-1
ID_44208	ANAPC11	RBM5	0.0100163	-0.129488	-1
ID_44216	ANAPC11	SRSF4	0.000789014	-0.163503	-1
ID_44208	ANAPC11	SRSF4	0.00650388	-0.136238	-1
ID_44217	ANAPC11	SRSF4	0.0144444	-0.121999	-1
ID_44211	ANAPC11	YBX1	0.0265846	0.111579	1
ID_44217	ANAPC11	YBX1	0.000351616	0.172961	1
ID_31138	ANKDD1A	FMR1	0.0221717	-0.114918	-1
ID_31137	ANKDD1A	FMR1	0.0221717	0.114918	1
ID_31137	ANKDD1A	SRSF4	0.0316537	-0.108584	-1
ID_31138	ANKDD1A	SRSF4	0.0316537	0.108584	1
ID_73653	ANKHD1	HNRNPA1	0.031568	0.108576	1
ID_62161	ANKRD54	FMR1	0.000104677	-0.199748	-1
ID_62161	ANKRD54	SRSF4	0.0153334	-0.129633	-1
ID_62163	ANKRD54	SRSF4	0.031618	0.116378	1
ID_26770	AP1G2	FMR1	0.0295482	-0.111222	-1
ID_26770	AP1G2	PCBP2	0.0126786	-0.125683	-1
ID_26770	AP1G2	QKI	0.0101414	-0.129538	-1
ID_73671	APBB3	PCBP2	0.0207052	-0.118498	-1
ID_73671	APBB3	PTBP2	0.0378099	-0.107444	-1
ID_85636	ARHGAP39	PCBP2	0.0393255	-0.110082	-1
ID_85636	ARHGAP39	YBX1	0.000682058	-0.173548	-1
ID_50100	ARHGEF1	HNRNPA1	0.00193982	-0.151482	-1
ID_50100	ARHGEF1	HNRNPDL	0.0318372	-0.108351	-1
ID_50100	ARHGEF1	QKI	0.000130175	0.184069	1
ID_8336	ARHGEF11	QKI	0.0328916	-0.110114	-1
ID_8337	ARHGEF11	QKI	0.0328916	0.110114	1
ID_8336	ARHGEF11	RBM5	0.0118233	-0.127968	-1
ID_8337	ARHGEF11	RBM5	0.0118233	0.127968	1
ID_8337	ARHGEF11	YBX1	0.000732613	-0.167409	-1
ID_8336	ARHGEF11	YBX1	0.000732613	0.167409	1
ID_43354	ARMC7	FMR1	0.000235272	-0.177483	-1
ID_43353	ARMC7	FMR1	0.000235272	0.177483	1
ID_43353	ARMC7	HNRNPA1	0.0317119	-0.108432	-1
ID_43354	ARMC7	HNRNPA1	0.0317119	0.108432	1
ID_43354	ARMC7	SRSF4	0.0164001	-0.119756	-1
ID_43353	ARMC7	SRSF4	0.0164001	0.119756	1
ID_87368	ASTN2	HNRNPDL	0.0378099	-0.105153	-1
ID_87369	ASTN2	HNRNPDL	0.0378099	0.10517	1
ID_46544	ATP8B3	FMR1	0.000399799	-0.180621	-1
ID_46543	ATP8B3	FMR1	0.000399799	0.180621	1
ID_46543	ATP8B3	HNRNPA1	0.0474102	-0.106457	-1
ID_46544	ATP8B3	HNRNPA1	0.0474102	0.106457	1
ID_46543	ATP8B3	HNRNPF	0.000171309	-0.190802	-1
ID_46544	ATP8B3	HNRNPF	0.000171309	0.190802	1
ID_46544	ATP8B3	PCBP2	0.0167768	-0.125891	-1
ID_46543	ATP8B3	PCBP2	0.0167768	0.125891	1
ID_46544	ATP8B3	QKI	0.000247779	-0.186475	-1
ID_46543	ATP8B3	QKI	0.000247779	0.186475	1
ID_35848	ATXN2L	HNRNPDL	0.00234865	0.154596	1
ID_35848	ATXN2L	RBM5	0.0068569	0.138955	1
ID_35848	ATXN2L	SRSF4	0.0196227	0.121329	1
ID_35848	ATXN2L	YBX1	0.0285543	-0.114574	-1
ID_86822	AUH	HNRNPA1	0.000130175	-0.184258	-1
ID_86823	AUH	HNRNPA1	0.000130175	0.184258	1
ID_86822	AUH	HNRNPDL	0.00417694	-0.141231	-1
ID_86823	AUH	HNRNPDL	0.00417694	0.141231	1
ID_86823	AUH	PCBP2	0.0182249	-0.118105	-1
ID_86822	AUH	PCBP2	0.0182249	0.118105	1
ID_86823	AUH	QKI	0.00114387	-0.158583	-1
ID_86822	AUH	QKI	0.00114387	0.158583	1
ID_86822	AUH	SRSF4	0.00039466	-0.171641	-1
ID_86823	AUH	SRSF4	0.00039466	0.171641	1
ID_32866	AXIN1	HNRNPDL	0.0408917	-0.10451	-1
ID_32866	AXIN1	HNRNPF	0.00071509	0.165449	1
ID_32866	AXIN1	PCBP2	0.00286354	-0.1473	-1
ID_32866	AXIN1	QKI	0.00082354	-0.163755	-1
ID_29982	BAHD1	QKI	0.0363315	-0.118932	-1
ID_37989	BANP	FMR1	0.0100817	0.131716	1
ID_37989	BANP	HNRNPA1	0.00370479	-0.14699	-1
ID_37989	BANP	QKI	0.0226089	0.117928	1
ID_51036	BCL2L12	HNRNPA1	0.023788	-0.131727	-1
ID_51036	BCL2L12	RBM5	0.0447857	0.118293	1
ID_43864	BIRC5	HNRNPA1	0.0173984	-0.127492	-1
ID_43864	BIRC5	YBX1	0.00737819	0.142506	1
ID_82993	BMP1	FMR1	0.0347592	0.109903	1
ID_82993	BMP1	SRSF4	0.0229164	0.117571	1
ID_82993	BMP1	YBX1	0.0489807	-0.103122	-1
ID_15609	C11orf49	FMR1	0.000943192	0.164184	1
ID_15609	C11orf49	HNRNPA1	0.0393258	-0.106607	-1
ID_15609	C11orf49	HNRNPDL	0.00374616	0.145502	1
ID_15609	C11orf49	PCBP2	0.0304016	0.111489	1
ID_15609	C11orf49	RBM5	0.000190274	0.183507	1
ID_19191	C11orf63	FMR1	0.031568	-0.113571	-1
ID_19192	C11orf63	FMR1	0.031568	0.113571	1
ID_19191	C11orf63	YBX1	0.00260548	-0.154277	-1
ID_19192	C11orf63	YBX1	0.00260548	0.154277	1
ID_24404	C12orf76	FMR1	0.0262046	0.111873	1
ID_24404	C12orf76	HNRNPA1	0.00205207	-0.150705	-1
ID_24404	C12orf76	HNRNPDL	0.0437528	0.102426	1
ID_24404	C12orf76	PCBP2	0.000162587	0.181545	1
ID_24404	C12orf76	RBM5	0.0166883	0.119447	1
ID_32921	C16orf13	FMR1	0.00982194	-0.128408	-1
ID_32921	C16orf13	HNRNPF	0.000430255	0.170461	1
ID_32921	C16orf13	PTBP2	0.00526573	-0.137911	-1
ID_32924	C16orf13	QKI	0.0152332	-0.12113	-1
ID_32923	C16orf13	QKI	0.0324497	-0.109368	-1
ID_49966	C19orf54	HNRNPF	0.0189568	0.117597	1
ID_49966	C19orf54	QKI	0.000255356	0.176815	1
ID_58436	C20orf96	PCBP2	0.000120326	-0.188504	-1
ID_58435	C20orf96	PCBP2	0.000120326	0.188504	1
ID_58436	C20orf96	YBX1	0.000518261	-0.171384	-1
ID_58435	C20orf96	YBX1	0.000518261	0.171384	1
ID_60928	C21orf58	HNRNPDL	0.0444871	0.104238	1
ID_60928	C21orf58	PCBP2	0.0066955	0.136973	1
ID_61055	C22orf39	HNRNPDL	0.00297525	0.145668	1
ID_61055	C22orf39	HNRNPF	0.00392953	-0.141915	-1
ID_70558	C4orf29	PTBP2	0.000278542	-0.175371	-1
ID_70557	C4orf29	PTBP2	0.000278542	0.175371	1
ID_70558	C4orf29	QKI	0.000135981	-0.18354	-1
ID_70557	C4orf29	QKI	0.000135981	0.18354	1
ID_70597	C4orf33	HNRNPA1	0.0230394	-0.114268	-1
ID_70596	C4orf33	HNRNPA1	0.0230394	0.114268	1
ID_73182	C5orf63	FMR1	0.000515056	0.168989	1
ID_73182	C5orf63	HNRNPF	0.009232	0.130028	1
ID_73182	C5orf63	QKI	0.000171309	0.181818	1
ID_73182	C5orf63	RBM5	0.0175191	-0.119233	-1
ID_76449	C6orf141	HNRNPA1	0.0493217	-0.112818	-1
ID_76447	C6orf141	HNRNPA1	0.0315228	0.122427	1
ID_76447	C6orf141	PTBP2	0.0011179	-0.178716	-1
ID_76449	C6orf141	PTBP2	0.00789803	0.148446	1
ID_76449	C6orf141	QKI	0.000639123	0.186316	1
ID_76447	C6orf141	RBM5	0.00788654	0.14848	1
ID_76447	C6orf141	YBX1	0.0282704	-0.124523	-1
ID_76449	C6orf141	YBX1	0.0265846	0.125752	1
ID_84100	C8orf34	FMR1	0.026254	-0.118114	-1
ID_84100	C8orf34	HNRNPA1	0.00281871	0.154614	1
ID_84100	C8orf34	HNRNPF	0.0137907	0.129467	1
ID_84100	C8orf34	PTBP2	0.0115375	-0.132775	-1
ID_23446	CAPS2	HNRNPA1	0.00695069	-0.154326	-1
ID_23445	CAPS2	HNRNPA1	0.00695069	0.154326	1
ID_23446	CAPS2	PCBP2	0.00285482	-0.168843	-1
ID_23445	CAPS2	PCBP2	0.00285482	0.168843	1
ID_47600	CARM1	HNRNPA1	0.0293279	-0.114433	-1
ID_47600	CARM1	HNRNPDL	0.000110177	0.193491	1
ID_47600	CARM1	YBX1	0.00614896	-0.141103	-1
ID_72858	CAST	HNRNPDL	0.0487202	0.103259	1
ID_72858	CAST	PTBP2	0.0240434	-0.116673	-1
ID_72858	CAST	YBX1	0.0235238	-0.117079	-1
ID_71137	CBR4	FMR1	0.00634039	-0.135048	-1
ID_86498	CBWD5	HNRNPA1	0.00313303	-0.14498	-1
ID_86498	CBWD5	PTBP2	0.000130573	0.184014	1
ID_86260	CCDC107	PTBP2	0.000524294	0.168096	1
ID_86260	CCDC107	RBM5	0.000487724	-0.168979	-1
ID_86995	CCDC180	HNRNPA1	0.00137081	-0.173603	-1
ID_86996	CCDC180	HNRNPA1	0.0207057	0.129127	1
ID_86996	CCDC180	PCBP2	0.000855089	-0.180312	-1
ID_86995	CCDC180	PCBP2	0.0451892	0.113326	1
ID_86995	CCDC180	PTBP2	0.000330329	0.193008	1
ID_86996	CCDC180	QKI	0.0132093	-0.137275	-1
ID_86995	CCDC180	QKI	0.0260924	0.124672	1
ID_86995	CCDC180	RBM5	0.0428394	-0.114572	-1
ID_86996	CCDC180	RBM5	0.00199848	0.168094	1
ID_86996	CCDC180	YBX1	0.0165522	-0.133172	-1
ID_65341	CCDC66	HNRNPDL	0.00189366	-0.152557	-1
ID_65343	CCDC66	HNRNPDL	0.0102219	0.128258	1
ID_65341	CCDC66	PTBP2	0.00495707	-0.139347	-1
ID_65343	CCDC66	PTBP2	0.0138377	0.123127	1
ID_65343	CCDC66	RBM5	0.00025364	0.177404	1
ID_18089	CCDC90B	PCBP2	0.000185751	-0.192938	-1
ID_18089	CCDC90B	SRSF4	0.0489807	-0.107465	-1
ID_18089	CCDC90B	YBX1	0.0209899	-0.124099	-1
ID_51313	CD33	FMR1	0.0019944	-0.161413	-1
ID_51314	CD33	FMR1	0.0019944	0.161413	1
ID_51313	CD33	HNRNPDL	0.000112665	-0.198189	-1
ID_51314	CD33	HNRNPDL	0.000112665	0.198189	1
ID_3881	CDC14A	FMR1	0.0271368	0.111458	1
ID_3881	CDC14A	HNRNPDL	0.0281186	0.110789	1
ID_3883	CDC14A	PTBP2	0.023788	-0.113772	-1
ID_3881	CDC14A	PTBP2	0.000144984	0.183212	1
ID_3881	CDC14A	QKI	0.0117417	0.125607	1
ID_3881	CDC14A	SRSF4	0.013717	0.122914	1
ID_7556	CDC42SE1	HNRNPA1	0.00946032	0.131863	1
ID_7556	CDC42SE1	HNRNPDL	0.012001	0.127871	1
ID_7556	CDC42SE1	HNRNPF	0.0028536	0.149581	1
ID_7556	CDC42SE1	PTBP2	0.00203423	-0.154237	-1
ID_7556	CDC42SE1	QKI	0.00289917	-0.149314	-1
ID_64919	CDHR4	HNRNPA1	0.0163876	-0.125989	-1
ID_64918	CDHR4	HNRNPA1	0.0163876	0.125989	1
ID_64918	CDHR4	PCBP2	0.000160356	-0.191016	-1
ID_64919	CDHR4	PCBP2	0.000160356	0.191016	1
ID_62468	CENPM	HNRNPA1	0.0351059	-0.107731	-1
ID_62466	CENPM	HNRNPF	0.0103978	0.128743	1
ID_62466	CENPM	PCBP2	0.0122799	-0.1259	-1
ID_62466	CENPM	PTBP2	0.000157243	-0.183881	-1
ID_62468	CENPM	RBM5	0.0220144	-0.116163	-1
ID_67000	CEP70	HNRNPA1	0.0305589	-0.109132	-1
ID_67000	CEP70	HNRNPDL	0.0235238	-0.113789	-1
ID_67000	CEP70	HNRNPF	0.000109975	0.185854	1
ID_67000	CEP70	PCBP2	0.00269645	0.147032	1
ID_67000	CEP70	SRSF4	0.0388387	-0.104657	-1
ID_44705	CEP76	HNRNPA1	0.000273445	0.176787	1
ID_44705	CEP76	HNRNPF	0.00241838	0.149513	1
ID_44705	CEP76	RBM5	0.000414078	-0.171956	-1
ID_46423	CIRBP	HNRNPF	0.00153065	-0.154599	-1
ID_46423	CIRBP	QKI	0.00116761	0.158168	1
ID_60874	COL18A1	HNRNPDL	0.0051512	-0.147875	-1
ID_60875	COL18A1	HNRNPDL	0.0051512	0.147875	1
ID_60875	COL18A1	YBX1	0.00657861	-0.144001	-1
ID_60874	COL18A1	YBX1	0.00657861	0.144001	1
ID_87736	COQ4	PCBP2	0.0124587	-0.124317	-1
ID_87736	COQ4	YBX1	0.000452632	-0.169672	-1
ID_34061	CPPED1	PCBP2	0.00911201	-0.130027	-1
ID_34061	CPPED1	PTBP2	0.00192757	-0.152002	-1
ID_23309	CPSF6	PCBP2	0.000243208	-0.186896	-1
ID_23309	CPSF6	PTBP2	0.00135486	-0.164887	-1
ID_23309	CPSF6	RBM5	0.00635277	0.142568	1
ID_23309	CPSF6	SRSF4	0.0276598	-0.117102	-1
ID_7768	CREB3L4	HNRNPA1	0.006116	-0.139788	-1
ID_7769	CREB3L4	HNRNPA1	0.006116	0.139788	1
ID_7768	CREB3L4	HNRNPF	0.000274846	-0.180937	-1
ID_7769	CREB3L4	HNRNPF	0.000274846	0.180937	1
ID_21955	CSAD	HNRNPA1	0.000169412	-0.201686	-1
ID_21955	CSAD	RBM5	0.0489612	-0.111778	-1
ID_64251	CTNNB1	HNRNPF	0.00109028	-0.159035	-1
ID_64251	CTNNB1	PTBP2	0.0335047	0.107429	1
ID_64251	CTNNB1	SRSF4	0.0208918	-0.115813	-1
ID_64251	CTNNB1	YBX1	0.000971666	0.160518	1
ID_42925	CYB561	PCBP2	0.0194248	-0.124767	-1
ID_42925	CYB561	QKI	0.00066233	-0.175946	-1
ID_42925	CYB561	RBM5	0.00325266	0.154063	1
ID_42925	CYB561	YBX1	0.00309415	-0.154741	-1
ID_50769	CYTH2	FMR1	0.000698058	0.16448	1
ID_50769	CYTH2	HNRNPF	0.00860965	-0.130555	-1
ID_50769	CYTH2	PCBP2	0.00487505	0.138922	1
ID_50769	CYTH2	RBM5	0.0151542	-0.121107	-1
ID_50769	CYTH2	YBX1	0.000867541	0.16189	1
ID_18486	DCUN1D5	HNRNPDL	0.00598798	0.145091	1
ID_18486	DCUN1D5	RBM5	0.00353827	0.153024	1
ID_18486	DCUN1D5	YBX1	0.0499799	-0.106554	-1
ID_54015	DGUOK	FMR1	0.027616	-0.111027	-1
ID_54015	DGUOK	PTBP2	0.000474269	-0.169309	-1
ID_54015	DGUOK	RBM5	0.000444424	0.170049	1
ID_54015	DGUOK	SRSF4	0.00469418	0.13968	1
ID_54015	DGUOK	YBX1	0.009232	-0.129457	-1
ID_82930	DMTN	FMR1	0.00103923	0.16958	1
ID_82930	DMTN	HNRNPA1	0.000102681	-0.198257	-1
ID_39292	DNAH9	HNRNPA1	0.0280217	-0.123206	-1
ID_39293	DNAH9	HNRNPA1	0.0280217	0.123206	1
ID_39293	DNAH9	PCBP2	0.000916738	-0.17939	-1
ID_39292	DNAH9	PCBP2	0.000916738	0.17939	1
ID_39293	DNAH9	PTBP2	0.00883049	-0.144933	-1
ID_39292	DNAH9	PTBP2	0.00883049	0.144933	1
ID_39293	DNAH9	QKI	0.0249038	-0.125563	-1
ID_39292	DNAH9	QKI	0.0249038	0.125563	1
ID_39293	DNAH9	YBX1	0.0002349	-0.197456	-1
ID_39292	DNAH9	YBX1	0.0002349	0.197456	1
ID_80544	DYNC1I1	FMR1	0.00091258	-0.165613	-1
ID_80544	DYNC1I1	HNRNPF	0.000514141	0.172706	1
ID_80544	DYNC1I1	PCBP2	0.00408746	-0.145177	-1
ID_80544	DYNC1I1	PTBP2	0.000707416	-0.168715	-1
ID_57142	EEF1B2	FMR1	0.0144444	0.122461	1
ID_57142	EEF1B2	PTBP2	0.00161108	0.154697	1
ID_57142	EEF1B2	QKI	0.00249122	0.148827	1
ID_57142	EEF1B2	YBX1	0.00094576	-0.161598	-1
ID_83800	EFCAB1	HNRNPA1	0.00196925	-0.166573	-1
ID_83801	EFCAB1	HNRNPA1	0.00196925	0.166573	1
ID_83800	EFCAB1	HNRNPF	0.0300441	-0.120582	-1
ID_83801	EFCAB1	HNRNPF	0.0300441	0.120582	1
ID_14954	EHF	HNRNPF	0.00753112	0.147301	1
ID_80063	EIF4H	HNRNPA1	0.000142931	-0.186067	-1
ID_80063	EIF4H	HNRNPF	0.00111681	-0.161368	-1
ID_80063	EIF4H	PCBP2	0.00406481	0.143818	1
ID_80063	EIF4H	PTBP2	0.000162587	0.184551	1
ID_48158	EPS15L1	HNRNPF	0.0393442	0.104385	1
ID_48158	EPS15L1	PCBP2	0.00572722	-0.136571	-1
ID_48158	EPS15L1	SRSF4	0.0175954	0.118588	1
ID_72264	ERBB2IP	HNRNPF	0.00680448	0.137381	1
ID_72264	ERBB2IP	PCBP2	0.000102914	-0.191386	-1
ID_72264	ERBB2IP	RBM5	0.0143486	0.125151	1
ID_50439	ERCC1	FMR1	0.000411183	-0.171396	-1
ID_50432	ERCC2	QKI	0.00131594	-0.160244	-1
ID_50432	ERCC2	YBX1	0.00523893	-0.141127	-1
ID_78161	ESR1	HNRNPA1	0.0398863	-0.114208	-1
ID_78163	ESR1	HNRNPF	0.0165925	0.131115	1
ID_78161	ESR1	PCBP2	0.000109514	0.203662	1
ID_78163	ESR1	PTBP2	0.009232	-0.141826	-1
ID_78163	ESR1	QKI	0.000153345	-0.199685	-1
ID_78161	ESR1	QKI	0.0148243	0.133183	1
ID_78161	ESR1	RBM5	0.0152558	-0.132674	-1
ID_76635	FAM135A	HNRNPA1	0.0236478	-0.113789	-1
ID_76634	FAM135A	HNRNPA1	0.0236478	0.113781	1
ID_76635	FAM135A	HNRNPDL	0.000409639	-0.171121	-1
ID_76634	FAM135A	HNRNPDL	0.00040956	0.171135	1
ID_76635	FAM135A	PCBP2	0.000238993	-0.177437	-1
ID_76634	FAM135A	PCBP2	0.000238993	0.177429	1
ID_76635	FAM135A	PTBP2	0.00190982	-0.151841	-1
ID_76634	FAM135A	PTBP2	0.00190983	0.15183	1
ID_76634	FAM135A	RBM5	0.00610092	-0.13579	-1
ID_76635	FAM135A	RBM5	0.00609437	0.135824	1
ID_8050	FAM189B	HNRNPDL	0.000594915	0.168971	1
ID_8050	FAM189B	PCBP2	0.0474102	-0.102476	-1
ID_8050	FAM189B	RBM5	0.00127554	0.159406	1
ID_9575	FAM72A	HNRNPDL	0.0312453	-0.110368	-1
ID_9576	FAM72A	HNRNPDL	0.0312453	0.110368	1
ID_9576	FAM72A	RBM5	0.00039466	-0.173966	-1
ID_9575	FAM72A	RBM5	0.00039466	0.173966	1
ID_9575	FAM72A	YBX1	0.00670176	-0.136129	-1
ID_9576	FAM72A	YBX1	0.00670176	0.136129	1
ID_36205	FBXL19	FMR1	0.00836434	0.137707	1
ID_36205	FBXL19	HNRNPA1	0.00281245	-0.154015	-1
ID_36205	FBXL19	HNRNPF	0.00350664	-0.150885	-1
ID_36205	FBXL19	PTBP2	0.00169158	0.161157	1
ID_83216	FBXO16	PTBP2	0.0263669	0.111858	1
ID_83216	FBXO16	RBM5	0.000600651	-0.166413	-1
ID_83216	FBXO16	SRSF4	0.00215638	-0.150191	-1
ID_83216	FBXO16	YBX1	0.0335047	-0.107533	-1
ID_21496	FKBP11	HNRNPA1	0.000439969	-0.170013	-1
ID_21495	FKBP11	HNRNPA1	0.000341114	0.173145	1
ID_21496	FKBP11	RBM5	0.0347701	-0.106789	-1
ID_21495	FKBP11	RBM5	0.047784	0.100694	1
ID_21495	FKBP11	YBX1	0.00875598	-0.130321	-1
ID_21496	FKBP11	YBX1	0.00754604	0.13244	1
ID_63827	GLB1	HNRNPA1	0.0102027	-0.132863	-1
ID_63829	GLB1	HNRNPA1	0.0102027	0.132863	1
ID_63829	GLB1	PTBP2	0.0135309	-0.127882	-1
ID_63827	GLB1	PTBP2	0.0135309	0.127882	1
ID_63829	GLB1	QKI	0.0356398	-0.1106	-1
ID_63827	GLB1	QKI	0.0356398	0.1106	1
ID_33866	GLYR1	HNRNPF	0.0027719	-0.168508	-1
ID_33866	GLYR1	PTBP2	0.01056	0.146077	1
ID_60006	GNAS	HNRNPA1	0.0271922	0.111195	1
ID_60006	GNAS	PCBP2	0.0100279	-0.127964	-1
ID_60006	GNAS	RBM5	0.00101096	0.159999	1
ID_75087	GNB2L1	PCBP2	0.0253021	-0.112609	-1
ID_36577	GPR56	HNRNPDL	0.000412447	-0.177751	-1
ID_36577	GPR56	QKI	0.0033556	-0.149931	-1
ID_43439	GRB2	PTBP2	0.00102216	-0.16818	-1
ID_43438	GRB2	PTBP2	0.00276149	0.154442	1
ID_43439	GRB2	QKI	0.033916	-0.11288	-1
ID_43438	GRB2	QKI	0.0242193	0.119223	1
ID_52703	GREB1	FMR1	0.0398455	0.10415	1
ID_52703	GREB1	HNRNPA1	0.00476083	-0.139262	-1
ID_52703	GREB1	HNRNPDL	0.0264421	0.111698	1
ID_87420	GSN	HNRNPF	0.00655922	0.138567	1
ID_87432	GSN	PCBP2	0.0113989	0.129091	1
ID_13051	GSTO2	HNRNPA1	0.00129607	-0.157183	-1
ID_13050	GSTO2	HNRNPA1	0.00129607	0.157183	1
ID_13050	GSTO2	HNRNPF	0.0168644	-0.119582	-1
ID_13051	GSTO2	HNRNPF	0.0168644	0.119582	1
ID_13050	GSTO2	PTBP2	0.00611217	-0.136005	-1
ID_13051	GSTO2	PTBP2	0.00611217	0.136005	1
ID_13051	GSTO2	SRSF4	0.00156327	-0.15478	-1
ID_13050	GSTO2	SRSF4	0.00156327	0.15478	1
ID_26679	HAUS4	YBX1	0.00496183	0.15812	1
ID_63490	HDAC11	FMR1	0.0351567	-0.110551	-1
ID_63490	HDAC11	PTBP2	0.0210347	-0.120004	-1
ID_63490	HDAC11	SRSF4	0.0288017	-0.114268	-1
ID_75775	HMGA1	FMR1	0.00679245	-0.142523	-1
ID_75775	HMGA1	HNRNPDL	0.0102027	-0.135872	-1
ID_75775	HMGA1	QKI	0.0384189	-0.11159	-1
ID_75775	HMGA1	RBM5	0.00267305	0.15656	1
ID_33118	HN1L	FMR1	0.0321986	-0.115695	-1
ID_33119	HN1L	FMR1	0.0321986	0.115695	1
ID_26558	HNRNPC	HNRNPA1	0.000256977	-0.177076	-1
ID_26558	HNRNPC	HNRNPF	0.00126164	-0.157753	-1
ID_26558	HNRNPC	QKI	0.000423702	0.171135	1
ID_50034	HNRNPUL1	FMR1	0.000547732	-0.168689	-1
ID_50034	HNRNPUL1	HNRNPA1	0.0242193	0.114135	1
ID_50034	HNRNPUL1	PTBP2	0.000629067	-0.166965	-1
ID_50034	HNRNPUL1	QKI	0.00906723	-0.130787	-1
ID_47866	HOOK2	FMR1	0.00186823	0.160662	1
ID_47866	HOOK2	HNRNPA1	0.0350881	-0.112717	-1
ID_47866	HOOK2	HNRNPF	0.009232	-0.136719	-1
ID_47866	HOOK2	PCBP2	0.00220104	0.158294	1
ID_47866	HOOK2	PTBP2	0.000449861	0.179383	1
ID_47866	HOOK2	QKI	0.0436438	0.108373	1
ID_47866	HOOK2	RBM5	0.000466163	-0.178965	-1
ID_85557	HSF1	PTBP2	0.000131794	-0.184085	-1
ID_85557	HSF1	YBX1	0.0449554	-0.101976	-1
ID_66738	IFT122	FMR1	0.00597559	-0.154127	-1
ID_66738	IFT122	PCBP2	0.00661751	-0.15232	-1
ID_66738	IFT122	PTBP2	0.0188046	-0.133238	-1
ID_66738	IFT122	RBM5	0.0248275	0.127957	1
ID_66738	IFT122	YBX1	0.000565718	-0.189158	-1
ID_13896	IGF2	PTBP2	0.021024	-0.128833	-1
ID_13898	IGF2	PTBP2	0.0215128	0.128391	1
ID_13898	IGF2	RBM5	0.0251369	-0.125396	-1
ID_13896	IGF2	RBM5	0.01284	0.137804	1
ID_44661	IMPA2	FMR1	0.0433986	0.10873	1
ID_44661	IMPA2	HNRNPF	0.00103708	-0.169072	-1
ID_44661	IMPA2	PCBP2	0.00330995	0.152835	1
ID_44661	IMPA2	QKI	0.00200106	0.159961	1
ID_44661	IMPA2	RBM5	0.00149002	0.164131	1
ID_44661	IMPA2	SRSF4	0.0118233	0.132686	1
ID_16337	INCENP	HNRNPF	0.0480237	-0.115097	-1
ID_16337	INCENP	PCBP2	0.0163893	0.13701	1
ID_16337	INCENP	PTBP2	0.0183599	0.13482	1
ID_16337	INCENP	QKI	0.000181631	0.205944	1
ID_87252	INIP	FMR1	0.000983449	-0.165482	-1
ID_87252	INIP	PCBP2	0.013951	-0.126342	-1
ID_87252	INIP	PTBP2	0.000363124	-0.177921	-1
ID_87252	INIP	QKI	0.0292312	-0.113439	-1
ID_68333	IQCG	HNRNPA1	0.00101916	-0.160023	-1
ID_68332	IQCG	HNRNPA1	0.00101916	0.160023	1
ID_68333	IQCG	HNRNPDL	0.0206373	-0.116154	-1
ID_68332	IQCG	HNRNPDL	0.0206373	0.116154	1
ID_68333	IQCG	HNRNPF	0.000525696	-0.168031	-1
ID_68332	IQCG	HNRNPF	0.000525696	0.168031	1
ID_68333	IQCG	QKI	0.00212933	-0.150361	-1
ID_68332	IQCG	QKI	0.00212933	0.150361	1
ID_51027	IRF3	PCBP2	0.0245002	-0.113271	-1
ID_51027	IRF3	QKI	0.00646461	-0.135031	-1
ID_51027	IRF3	RBM5	0.00365755	0.143199	1
ID_51027	IRF3	YBX1	0.00175661	-0.153106	-1
ID_37514	IST1	HNRNPDL	0.000996179	0.170776	1
ID_37514	IST1	PTBP2	0.000389601	0.182951	1
ID_37514	IST1	QKI	0.0494049	-0.106684	-1
ID_37514	IST1	RBM5	0.000433284	0.181393	1
ID_37514	IST1	SRSF4	0.0115245	0.134096	1
ID_3267	ITGB3BP	HNRNPA1	0.0152332	-0.137043	-1
ID_3267	ITGB3BP	HNRNPDL	0.000632836	-0.187354	-1
ID_3267	ITGB3BP	RBM5	0.0144439	-0.13803	-1
ID_45429	KATNAL2	FMR1	0.0116589	-0.133097	-1
ID_45430	KATNAL2	FMR1	0.0116589	0.133097	1
ID_45429	KATNAL2	PTBP2	0.0248275	-0.119671	-1
ID_45430	KATNAL2	PTBP2	0.0248275	0.119671	1
ID_45429	KATNAL2	YBX1	0.00362243	-0.151697	-1
ID_45430	KATNAL2	YBX1	0.00362243	0.151697	1
ID_85827	KDM4C	FMR1	0.04822	-0.100525	-1
ID_85827	KDM4C	HNRNPF	0.00474681	0.13931	1
ID_85827	KDM4C	PCBP2	0.0304016	-0.109226	-1
ID_85827	KDM4C	PTBP2	0.000151021	-0.182427	-1
ID_39056	KDM6B	HNRNPF	0.00186749	-0.171418	-1
ID_39056	KDM6B	PTBP2	0.00117327	0.178249	1
ID_39056	KDM6B	SRSF4	0.00492258	0.156526	1
ID_66688	KIAA1257	FMR1	0.00018346	-0.1802	-1
ID_66689	KIAA1257	FMR1	0.00018346	0.1802	1
ID_66688	KIAA1257	HNRNPDL	0.0350141	-0.10665	-1
ID_66689	KIAA1257	HNRNPDL	0.0350141	0.10665	1
ID_66689	KIAA1257	RBM5	0.000560051	-0.167142	-1
ID_66688	KIAA1257	RBM5	0.000560051	0.167142	1
ID_82760	KIAA1456	HNRNPF	0.0495607	-0.0999654	-1
ID_82760	KIAA1456	PTBP2	0.00101916	0.159863	1
ID_82760	KIAA1456	SRSF4	0.0177534	0.11842	1
ID_82760	KIAA1456	YBX1	0.000599743	0.166282	1
ID_10722	KIN	HNRNPDL	0.000877305	-0.162208	-1
ID_21744	LETMD1	HNRNPA1	0.023788	-0.117686	-1
ID_21744	LETMD1	HNRNPF	0.0397212	-0.108006	-1
ID_21744	LETMD1	PTBP2	0.00100494	0.165886	1
ID_21744	LETMD1	YBX1	0.0114428	0.130477	1
ID_78616	LFNG	PCBP2	0.00965182	-0.14483	-1
ID_45829	LINC00908	HNRNPA1	0.00761843	-0.133816	-1
ID_45828	LINC00908	HNRNPA1	0.00188539	0.153658	1
ID_40172	LRRC37B	QKI	0.00141369	-0.16223	-1
ID_16865	LTBP3	RBM5	0.000281319	0.176604	1
ID_66354	MAATS1	HNRNPA1	0.0459982	-0.105687	-1
ID_66353	MAATS1	HNRNPA1	0.0459982	0.105692	1
ID_66354	MAATS1	HNRNPF	0.00281871	-0.152522	-1
ID_66353	MAATS1	HNRNPF	0.00281871	0.152512	1
ID_66353	MAATS1	YBX1	0.0234666	-0.118589	-1
ID_66354	MAATS1	YBX1	0.0234666	0.118598	1
ID_89245	MAGED2	HNRNPA1	0.0424777	0.104537	1
ID_89245	MAGED2	PCBP2	0.0272635	-0.112778	-1
ID_89247	MAGED2	PCBP2	0.00057658	0.169191	1
ID_89245	MAGED2	QKI	0.000238993	-0.17984	-1
ID_89247	MAGED2	QKI	0.000214511	0.181105	1
ID_89245	MAGED2	SRSF4	0.0466234	0.102693	1
ID_89245	MAGED2	YBX1	0.00909181	-0.131606	-1
ID_89247	MAGED2	YBX1	0.00935674	0.131015	1
ID_38164	MC1R	HNRNPA1	0.0233404	0.128272	1
ID_38164	MC1R	YBX1	0.0104906	0.143172	1
ID_38771	MED31	RBM5	0.0418057	0.104305	1
ID_80949	MEPCE	PCBP2	0.0075638	-0.134597	-1
ID_80950	MEPCE	PCBP2	0.0075638	0.134582	1
ID_57814	MFF	HNRNPDL	0.00141765	-0.156307	-1
ID_57814	MFF	PCBP2	0.0156401	0.121132	1
ID_57814	MFF	RBM5	0.0393442	-0.104893	-1
ID_57813	MFF	SRSF4	0.0431898	-0.112804	-1
ID_78446	MLLT4	FMR1	0.000416136	-0.170692	-1
ID_78447	MLLT4	FMR1	0.000416136	0.170682	1
ID_78447	MLLT4	HNRNPF	0.000414088	-0.170783	-1
ID_78446	MLLT4	HNRNPF	0.000414088	0.170787	1
ID_78446	MLLT4	PCBP2	0.000521656	-0.168006	-1
ID_78447	MLLT4	PCBP2	0.000521656	0.168001	1
ID_78446	MLLT4	PTBP2	0.000154976	-0.182149	-1
ID_78447	MLLT4	PTBP2	0.000154981	0.182135	1
ID_78446	MLLT4	QKI	0.00612838	-0.135523	-1
ID_78447	MLLT4	QKI	0.00612819	0.135538	1
ID_78447	MLLT4	RBM5	0.00128942	-0.156822	-1
ID_78446	MLLT4	RBM5	0.00128942	0.156814	1
ID_58118	MLPH	PCBP2	0.0275503	-0.115725	-1
ID_58118	MLPH	YBX1	0.0236392	-0.118568	-1
ID_24926	MLXIP	FMR1	0.00082845	-0.162423	-1
ID_24925	MLXIP	FMR1	0.00082845	0.162415	1
ID_24925	MLXIP	HNRNPF	0.00183615	-0.152234	-1
ID_24926	MLXIP	HNRNPF	0.00183615	0.15223	1
ID_24926	MLXIP	PTBP2	0.0128571	-0.123741	-1
ID_24925	MLXIP	PTBP2	0.01284	0.123769	1
ID_24926	MLXIP	SRSF4	0.0126418	-0.124065	-1
ID_24925	MLXIP	SRSF4	0.0126418	0.124067	1
ID_13894	MRPL23	PTBP2	0.00213219	-0.150912	-1
ID_13894	MRPL23	QKI	0.000101993	-0.187631	-1
ID_53046	MRPL33	FMR1	0.00148508	0.155012	1
ID_53046	MRPL33	HNRNPA1	0.0493919	-0.100041	-1
ID_53046	MRPL33	HNRNPF	0.000106029	0.186231	1
ID_53046	MRPL33	PCBP2	0.00567827	0.136715	1
ID_53046	MRPL33	QKI	0.00465959	0.139672	1
ID_53046	MRPL33	SRSF4	0.00216756	-0.149965	-1
ID_53046	MRPL33	YBX1	0.0256628	0.112277	1
ID_49738	MRPS12	HNRNPA1	0.0075638	-0.133403	-1
ID_22378	MYL6	FMR1	0.0114807	0.125841	1
ID_22378	MYL6	HNRNPDL	0.0352244	0.106515	1
ID_22378	MYL6	QKI	0.000170731	0.181027	1
ID_22378	MYL6	YBX1	0.00946032	0.128923	1
ID_85430	NAPRT1	FMR1	0.0361111	0.106964	1
ID_85430	NAPRT1	HNRNPDL	0.00111681	0.160111	1
ID_85430	NAPRT1	PTBP2	0.000307123	0.175826	1
ID_32978	NARFL	FMR1	0.0047389	-0.160111	-1
ID_32979	NARFL	FMR1	0.0047389	0.160111	1
ID_32978	NARFL	HNRNPDL	0.000546915	-0.19224	-1
ID_32979	NARFL	HNRNPDL	0.000546915	0.19224	1
ID_32979	NARFL	HNRNPF	0.000408714	-0.196328	-1
ID_32978	NARFL	HNRNPF	0.000408714	0.196328	1
ID_32978	NARFL	SRSF4	0.0362434	-0.12183	-1
ID_32979	NARFL	SRSF4	0.0362434	0.12183	1
ID_86101	NFX1	FMR1	0.00060407	-0.166182	-1
ID_86101	NFX1	RBM5	0.00224146	0.149539	1
ID_86101	NFX1	YBX1	0.00022176	-0.178152	-1
ID_62449	NHP2L1	SRSF4	0.0113456	-0.126172	-1
ID_33737	NMRAL1	FMR1	0.0489063	-0.106365	-1
ID_33740	NMRAL1	FMR1	0.0012617	0.161342	1
ID_33740	NMRAL1	HNRNPDL	0.0164014	0.122965	1
ID_33740	NMRAL1	PTBP2	0.009232	0.132801	1
ID_34149	NPIPA5	FMR1	0.0130283	0.123866	1
ID_34149	NPIPA5	HNRNPF	0.00652034	0.135011	1
ID_34149	NPIPA5	QKI	0.000630622	0.166126	1
ID_266561	NPIPA8	HNRNPDL	0.0286534	0.123957	1
ID_266561	NPIPA8	PCBP2	0.0050703	0.155445	1
ID_266561	NPIPA8	PTBP2	0.0193406	0.131612	1
ID_266561	NPIPA8	YBX1	0.000269764	0.197361	1
ID_43357	NT5C	HNRNPA1	0.00057235	-0.167329	-1
ID_43358	NT5C	HNRNPA1	0.00057235	0.167329	1
ID_43358	NT5C	HNRNPDL	0.00908705	-0.130096	-1
ID_43357	NT5C	HNRNPDL	0.00908705	0.130096	1
ID_43358	NT5C	PCBP2	0.00948267	-0.129232	-1
ID_43357	NT5C	PCBP2	0.00948267	0.129232	1
ID_43358	NT5C	QKI	0.000104709	-0.186924	-1
ID_43357	NT5C	QKI	0.000104709	0.186924	1
ID_43358	NT5C	RBM5	0.0121714	-0.12511	-1
ID_43357	NT5C	RBM5	0.0121714	0.12511	1
ID_43358	NT5C	SRSF4	0.0234171	-0.114216	-1
ID_43357	NT5C	SRSF4	0.0234171	0.114216	1
ID_43357	NT5C	YBX1	0.00674671	-0.134442	-1
ID_43358	NT5C	YBX1	0.00674671	0.134442	1
ID_28288	NUMB	FMR1	0.0415091	-0.105698	-1
ID_28288	NUMB	YBX1	0.00610092	-0.138604	-1
ID_78962	NUPL2	HNRNPDL	0.00219743	0.158664	1
ID_78962	NUPL2	HNRNPF	0.0127217	-0.131296	-1
ID_78962	NUPL2	PCBP2	0.000106029	0.197189	1
ID_78962	NUPL2	PTBP2	0.000268455	0.186182	1
ID_3672	ODF2L	FMR1	0.000511512	0.168294	1
ID_3672	ODF2L	HNRNPA1	0.00205847	-0.150646	-1
ID_3672	ODF2L	PCBP2	0.00025022	0.176709	1
ID_3672	ODF2L	QKI	0.00133123	0.156397	1
ID_3672	ODF2L	SRSF4	0.00435961	-0.140533	-1
ID_3672	ODF2L	YBX1	0.0396163	0.104262	1
ID_62862	ODF3B	RBM5	0.009232	0.14467	1
ID_72891	PAM	HNRNPF	0.00137851	-0.167318	-1
ID_72891	PAM	RBM5	0.00826765	0.140734	1
ID_31528	PARP6	PCBP2	0.0194651	0.12047	1
ID_48878	PDCD5	HNRNPA1	0.0319468	-0.108279	-1
ID_48877	PDCD5	HNRNPA1	0.0319468	0.108279	1
ID_48877	PDCD5	PCBP2	0.00955122	-0.128712	-1
ID_48878	PDCD5	PCBP2	0.00955122	0.128702	1
ID_48877	PDCD5	PTBP2	0.0153972	-0.120824	-1
ID_48878	PDCD5	PTBP2	0.0153972	0.120812	1
ID_48877	PDCD5	QKI	0.000130175	-0.184059	-1
ID_48878	PDCD5	QKI	0.000130175	0.184057	1
ID_48877	PDCD5	YBX1	0.00100907	-0.160032	-1
ID_48878	PDCD5	YBX1	0.00100861	0.160049	1
ID_88633	PDHA1	FMR1	0.0286726	0.110548	1
ID_88633	PDHA1	HNRNPA1	0.00120241	-0.158223	-1
ID_88633	PDHA1	PTBP2	0.00883428	0.130535	1
ID_88633	PDHA1	RBM5	0.0122425	-0.124999	-1
ID_88633	PDHA1	SRSF4	0.000426133	-0.170899	-1
ID_77922	PEX7	FMR1	0.0337341	0.115975	1
ID_77922	PEX7	PTBP2	0.00175661	0.16506	1
ID_77922	PEX7	QKI	0.045142	0.110004	1
ID_25893	PHF11	PCBP2	0.000208114	0.18287	1
ID_25893	PHF11	QKI	0.00926574	-0.132204	-1
ID_25893	PHF11	RBM5	0.000102383	0.190895	1
ID_89235	PHF8	FMR1	0.00043171	0.170251	1
ID_89235	PHF8	HNRNPA1	0.00035744	-0.172603	-1
ID_89235	PHF8	QKI	0.000353562	0.172727	1
ID_89235	PHF8	SRSF4	0.000439969	-0.170005	-1
ID_7591	PI4KB	FMR1	0.00158229	-0.164002	-1
ID_7591	PI4KB	HNRNPF	0.00280915	0.15586	1
ID_7591	PI4KB	PTBP2	0.0112521	-0.134251	-1
ID_7591	PI4KB	RBM5	0.00750519	0.141008	1
ID_13766	PIDD	PCBP2	0.00428207	0.143677	1
ID_38024	PIEZO1	HNRNPF	0.01966	-0.133751	-1
ID_12578	PLCE1	FMR1	0.016121	-0.12009	-1
ID_12579	PLCE1	FMR1	0.016121	0.12009	1
ID_12579	PLCE1	HNRNPA1	0.000263663	-0.17604	-1
ID_12578	PLCE1	HNRNPA1	0.000263663	0.17604	1
ID_12579	PLCE1	HNRNPF	0.0260924	-0.111966	-1
ID_12578	PLCE1	HNRNPF	0.0260924	0.111966	1
ID_12578	PLCE1	PTBP2	0.0116075	-0.125606	-1
ID_12579	PLCE1	PTBP2	0.0116075	0.125606	1
ID_56543	PMS1	HNRNPA1	0.0178165	-0.118359	-1
ID_56544	PMS1	HNRNPA1	0.0178203	0.118346	1
ID_56544	PMS1	QKI	0.0432674	-0.102675	-1
ID_56543	PMS1	QKI	0.0432127	0.102705	1
ID_87950	POMT1	PTBP2	0.0216029	0.133657	1
ID_21226	PPHLN1	FMR1	0.00224878	0.15411	1
ID_21226	PPHLN1	HNRNPDL	0.00979546	0.132314	1
ID_21226	PPHLN1	HNRNPF	0.00352416	-0.147875	-1
ID_21226	PPHLN1	SRSF4	0.0475706	0.103935	1
ID_78083	PPIL4	HNRNPF	0.000134503	-0.203551	-1
ID_78082	PPIL4	HNRNPF	0.000134503	0.203551	1
ID_78082	PPIL4	QKI	0.00162374	-0.170586	-1
ID_78083	PPIL4	QKI	0.00162374	0.170586	1
ID_78083	PPIL4	YBX1	0.00119861	-0.174989	-1
ID_78082	PPIL4	YBX1	0.00119861	0.174989	1
ID_58337	PPP1R7	YBX1	0.00331095	0.145242	1
ID_18674	PPP2R1B	HNRNPDL	0.0444871	-0.102107	-1
ID_18672	PPP2R1B	HNRNPDL	0.0444871	0.102107	1
ID_18672	PPP2R1B	HNRNPF	0.009232	-0.129323	-1
ID_18674	PPP2R1B	HNRNPF	0.009232	0.129323	1
ID_18674	PPP2R1B	QKI	0.000620787	-0.165867	-1
ID_18672	PPP2R1B	QKI	0.000620787	0.165867	1
ID_18672	PPP2R1B	RBM5	0.00889857	-0.130043	-1
ID_18674	PPP2R1B	RBM5	0.00889857	0.130043	1
ID_18674	PPP2R1B	YBX1	0.0474881	-0.100835	-1
ID_18672	PPP2R1B	YBX1	0.0474881	0.100835	1
ID_87834	PPP2R4	FMR1	0.00662025	0.136198	1
ID_87834	PPP2R4	PCBP2	0.00175661	0.154877	1
ID_87847	PPP2R4	PTBP2	0.00295669	-0.150879	-1
ID_87834	PPP2R4	PTBP2	0.00235326	0.150883	1
ID_65624	PPP4R2	QKI	0.0126786	-0.123985	-1
ID_65623	PPP4R2	QKI	0.0126512	0.124045	1
ID_65623	PPP4R2	RBM5	0.00137046	-0.156035	-1
ID_65624	PPP4R2	RBM5	0.00137081	0.156009	1
ID_16640	PRDX5	HNRNPDL	0.01615	-0.120285	-1
ID_16640	PRDX5	RBM5	0.000732613	0.164177	1
ID_43101	PRKCA	HNRNPF	0.0055822	-0.137106	-1
ID_43100	PRKCA	HNRNPF	0.0055822	0.137112	1
ID_43100	PRKCA	PTBP2	0.000415726	-0.17088	-1
ID_43101	PRKCA	PTBP2	0.000415726	0.170883	1
ID_43100	PRKCA	SRSF4	0.0176187	-0.118663	-1
ID_43101	PRKCA	SRSF4	0.0176187	0.118666	1
ID_68825	PROM1	FMR1	0.00528808	-0.149452	-1
ID_68825	PROM1	HNRNPF	0.00470845	0.151349	1
ID_68825	PROM1	QKI	0.0104066	-0.138232	-1
ID_68825	PROM1	YBX1	0.00183406	-0.165217	-1
ID_54495	PROM2	FMR1	0.000122262	0.186146	1
ID_54495	PROM2	HNRNPA1	0.0261549	-0.11278	-1
ID_54495	PROM2	HNRNPDL	0.0206373	-0.116958	-1
ID_54495	PROM2	PTBP2	0.000247811	0.17819	1
ID_54495	PROM2	QKI	0.00241178	0.149701	1
ID_54495	PROM2	RBM5	0.00470248	-0.140592	-1
ID_28261	PSEN1	HNRNPF	0.043502	-0.117479	-1
ID_28261	PSEN1	PCBP2	0.0257812	-0.1285	-1
ID_28261	PSEN1	RBM5	0.0167768	0.136672	1
ID_85292	PTK2	FMR1	0.00506023	0.145654	1
ID_85292	PTK2	PCBP2	0.00916726	0.13634	1
ID_85292	PTK2	RBM5	0.0493377	-0.105357	-1
ID_85292	PTK2	YBX1	0.0208722	0.121947	1
ID_51095	PTOV1	HNRNPDL	0.000205361	-0.180878	-1
ID_51094	PTOV1	HNRNPDL	0.000205361	0.180878	1
ID_51094	PTOV1	HNRNPF	0.00190982	-0.153316	-1
ID_51095	PTOV1	HNRNPF	0.00190982	0.153316	1
ID_51095	PTOV1	PTBP2	0.00014994	-0.184444	-1
ID_51094	PTOV1	PTBP2	0.00014994	0.184444	1
ID_51095	PTOV1	RBM5	0.00225654	-0.150996	-1
ID_51094	PTOV1	RBM5	0.00225654	0.150996	1
ID_51095	PTOV1	SRSF4	0.0120379	-0.126294	-1
ID_51094	PTOV1	SRSF4	0.0120379	0.126294	1
ID_38673	RABEP1	YBX1	0.00396049	-0.164795	-1
ID_4178	RAP1A	FMR1	0.0126603	-0.142732	-1
ID_4177	RAP1A	FMR1	0.00313622	0.166744	1
ID_4178	RAP1A	HNRNPA1	0.00260211	0.169709	1
ID_4177	RAP1A	HNRNPDL	0.0028536	0.168234	1
ID_4178	RAP1A	HNRNPF	0.0259515	0.12902	1
ID_4178	RAP1A	PCBP2	0.000382577	-0.197572	-1
ID_4178	RAP1A	PTBP2	0.000263629	-0.202362	-1
ID_4177	RAP1A	PTBP2	0.000310631	0.200199	1
ID_17102	RBM14-RBM4	FMR1	0.0265846	-0.125011	-1
ID_17102	RBM14-RBM4	HNRNPF	0.0188213	0.131602	1
ID_17102	RBM14-RBM4	RBM5	0.00127152	-0.175758	-1
ID_17102	RBM14-RBM4	SRSF4	0.000578339	-0.186577	-1
ID_55565	RBM43	HNRNPA1	0.0050703	-0.138591	-1
ID_55566	RBM43	HNRNPA1	0.0050703	0.138591	1
ID_32946	RHOT2	HNRNPF	0.00908705	0.135695	1
ID_32946	RHOT2	PTBP2	0.000316028	-0.181936	-1
ID_32946	RHOT2	RBM5	0.00505463	-0.144764	-1
ID_9156	RNASEL	FMR1	0.0329707	-0.107916	-1
ID_9155	RNASEL	FMR1	0.0329707	0.107916	1
ID_9155	RNASEL	HNRNPA1	0.0374188	-0.105569	-1
ID_9156	RNASEL	HNRNPA1	0.0374188	0.105569	1
ID_75487	RNF144B	FMR1	0.0124189	-0.140657	-1
ID_75486	RNF144B	FMR1	0.0124189	0.140657	1
ID_75487	RNF144B	PCBP2	0.0416927	-0.116926	-1
ID_75486	RNF144B	PCBP2	0.0416927	0.116926	1
ID_33261	RNPS1	HNRNPDL	0.00308709	0.145738	1
ID_84639	RPL30	PCBP2	0.0356398	-0.106793	-1
ID_84639	RPL30	RBM5	0.014947	0.121907	1
ID_70300	RPL34	FMR1	0.0104279	-0.127312	-1
ID_70298	RPL34	FMR1	0.0104279	0.127312	1
ID_70300	RPL34	HNRNPDL	0.00152411	-0.15466	-1
ID_70298	RPL34	HNRNPDL	0.00152411	0.15466	1
ID_70300	RPL34	PTBP2	0.0122587	-0.124601	-1
ID_70298	RPL34	PTBP2	0.0122587	0.124601	1
ID_70300	RPL34	RBM5	0.0144613	-0.121837	-1
ID_70298	RPL34	RBM5	0.0144613	0.121837	1
ID_24731	RPLP0	PCBP2	0.0177139	-0.120439	-1
ID_24731	RPLP0	PTBP2	0.000210494	-0.181664	-1
ID_12297	RPS24	HNRNPF	0.000247832	0.176818	1
ID_12297	RPS24	PTBP2	0.00350126	-0.143535	-1
ID_12297	RPS24	RBM5	0.00030366	0.174458	1
ID_70824	RPS3A	FMR1	0.000104677	0.191001	1
ID_70824	RPS3A	HNRNPA1	0.00449903	-0.143589	-1
ID_70824	RPS3A	PTBP2	0.00015579	0.186544	1
ID_14034	RRM1	HNRNPDL	0.0259515	-0.119516	-1
ID_14033	RRM1	HNRNPDL	0.0259515	0.119516	1
ID_14033	RRM1	HNRNPF	0.0375577	-0.11229	-1
ID_14034	RRM1	HNRNPF	0.0375577	0.11229	1
ID_14034	RRM1	PCBP2	0.000395864	-0.182695	-1
ID_14033	RRM1	PCBP2	0.000395864	0.182695	1
ID_77326	RWDD1	QKI	0.00612838	0.142645	1
ID_14579	SAA2	HNRNPA1	0.000873484	-0.173793	-1
ID_14579	SAA2	RBM5	0.00138258	-0.167454	-1
ID_25153	SCARB1	PTBP2	0.0343708	-0.114858	-1
ID_25153	SCARB1	RBM5	0.0156221	-0.129428	-1
ID_98107	SCRIB	PTBP2	0.0379655	-0.112066	-1
ID_98107	SCRIB	YBX1	0.0136171	-0.130939	-1
ID_42116	SCRN2	HNRNPF	0.00943996	-0.13284	-1
ID_42115	SCRN2	HNRNPF	0.00943996	0.13284	1
ID_42116	SCRN2	RBM5	0.00127152	-0.161693	-1
ID_42115	SCRN2	RBM5	0.00127152	0.161693	1
ID_43701	SEC14L1	HNRNPA1	0.0288017	-0.116457	-1
ID_43701	SEC14L1	QKI	0.00916845	0.136909	1
ID_43701	SEC14L1	RBM5	0.00262792	-0.155781	-1
ID_43701	SEC14L1	SRSF4	0.00345523	-0.1519	-1
ID_43701	SEC14L1	YBX1	0.009232	-0.136748	-1
ID_3354	SERBP1	HNRNPA1	0.000178456	-0.180526	-1
ID_3354	SERBP1	RBM5	0.000240268	-0.177194	-1
ID_14558	SERGEF	FMR1	0.0216293	0.115314	1
ID_14558	SERGEF	HNRNPA1	0.000333176	-0.173576	-1
ID_14558	SERGEF	HNRNPF	0.0166288	-0.119623	-1
ID_14558	SERGEF	PTBP2	0.036646	0.105828	1
ID_14558	SERGEF	QKI	0.00937573	0.129208	1
ID_1469	SERINC2	HNRNPDL	0.00507428	-0.14201	-1
ID_1471	SERINC2	HNRNPDL	0.00593232	0.139745	1
ID_1471	SERINC2	HNRNPF	0.010864	-0.130098	-1
ID_1469	SERINC2	HNRNPF	0.00496183	0.142366	1
ID_1471	SERINC2	YBX1	0.00168287	-0.157462	-1
ID_1469	SERINC2	YBX1	0.00356833	0.1471	1
ID_35977	SEZ6L2	HNRNPDL	0.0388387	0.106099	1
ID_35977	SEZ6L2	HNRNPF	0.0023231	0.151071	1
ID_35977	SEZ6L2	RBM5	0.00098089	0.162584	1
ID_77771	SGK1	HNRNPDL	0.00419146	0.160641	1
ID_68592	SH3BP2	FMR1	0.0168839	0.136174	1
ID_68592	SH3BP2	HNRNPDL	0.0242193	-0.129373	-1
ID_68592	SH3BP2	HNRNPF	0.0100163	-0.146177	-1
ID_68592	SH3BP2	RBM5	0.0010218	-0.182402	-1
ID_68592	SH3BP2	YBX1	0.0082379	0.149812	1
ID_18875	SIK3	HNRNPA1	0.0439815	-0.10717	-1
ID_18875	SIK3	HNRNPF	0.00164771	-0.160821	-1
ID_74638	SIMC1	FMR1	0.0153972	-0.140831	-1
ID_74638	SIMC1	PTBP2	0.00910281	-0.151146	-1
ID_75396	SIRT5	HNRNPF	0.000115848	0.191576	1
ID_75396	SIRT5	PCBP2	0.000133776	-0.189977	-1
ID_75396	SIRT5	QKI	0.000501689	-0.174234	-1
ID_50517	SIX5	HNRNPA1	0.0295538	-0.111099	-1
ID_50517	SIX5	PCBP2	0.0167147	0.12093	1
ID_50517	SIX5	RBM5	0.0110357	0.128073	1
ID_50517	SIX5	SRSF4	0.0225106	0.116017	1
ID_29253	SLC25A29	FMR1	0.0100163	0.127991	1
ID_29253	SLC25A29	HNRNPF	0.00205847	-0.150652	-1
ID_29253	SLC25A29	QKI	0.00262718	0.147397	1
ID_29253	SLC25A29	RBM5	0.00695485	0.133598	1
ID_29253	SLC25A29	YBX1	0.0449098	-0.101905	-1
ID_39151	SLC25A35	FMR1	0.00567418	-0.136735	-1
ID_39149	SLC25A35	FMR1	0.00567418	0.136735	1
ID_39149	SLC25A35	HNRNPA1	0.000100914	-0.186898	-1
ID_39151	SLC25A35	HNRNPA1	0.000100914	0.186898	1
ID_39151	SLC25A35	PCBP2	0.0103527	-0.127451	-1
ID_39149	SLC25A35	PCBP2	0.0103527	0.127451	1
ID_39149	SLC25A35	PTBP2	0.0104959	-0.127193	-1
ID_39151	SLC25A35	PTBP2	0.0104959	0.127193	1
ID_39149	SLC25A35	SRSF4	0.000203387	-0.179103	-1
ID_39151	SLC25A35	SRSF4	0.000203387	0.179103	1
ID_21085	SLC2A13	HNRNPA1	0.00121034	-0.160289	-1
ID_21086	SLC2A13	HNRNPA1	0.00121034	0.160289	1
ID_21085	SLC2A13	HNRNPDL	0.021317	-0.117385	-1
ID_21086	SLC2A13	HNRNPDL	0.021317	0.117385	1
ID_21085	SLC2A13	HNRNPF	0.00299457	-0.147989	-1
ID_21086	SLC2A13	HNRNPF	0.00299457	0.147989	1
ID_21086	SLC2A13	PTBP2	0.00480428	-0.141442	-1
ID_21085	SLC2A13	PTBP2	0.00480428	0.141442	1
ID_21086	SLC2A13	QKI	0.0116075	-0.1277	-1
ID_21085	SLC2A13	QKI	0.0116075	0.1277	1
ID_21085	SLC2A13	YBX1	0.00556677	-0.139312	-1
ID_21086	SLC2A13	YBX1	0.00556677	0.139312	1
ID_44115	SLC38A10	HNRNPA1	0.000385818	-0.171767	-1
ID_44114	SLC38A10	HNRNPA1	0.000385818	0.171767	1
ID_16462	SLC3A2	FMR1	0.0489804	0.100324	1
ID_16462	SLC3A2	QKI	0.0164001	0.119889	1
ID_16462	SLC3A2	RBM5	0.000101405	-0.187001	-1
ID_16462	SLC3A2	SRSF4	0.0441489	-0.102359	-1
ID_65391	SLMAP	HNRNPDL	0.0315647	-0.108592	-1
ID_53625	SMEK2	HNRNPA1	0.0316223	-0.118473	-1
ID_53625	SMEK2	YBX1	0.0140337	0.133523	1
ID_61810	SMTN	HNRNPF	0.0437176	-0.112895	-1
ID_61811	SMTN	HNRNPF	0.0437176	0.112895	1
ID_61811	SMTN	RBM5	0.0226608	-0.126085	-1
ID_61810	SMTN	RBM5	0.0226608	0.126085	1
ID_16730	SNX15	FMR1	0.0210347	-0.115897	-1
ID_16730	SNX15	RBM5	0.000101365	0.187196	1
ID_16730	SNX15	YBX1	0.000323137	-0.17408	-1
ID_60435	SON	FMR1	0.000162587	-0.181564	-1
ID_60435	SON	PTBP2	0.0279461	-0.1107	-1
ID_60435	SON	RBM5	0.000161989	0.181622	1
ID_60435	SON	YBX1	0.0130907	-0.123431	-1
ID_30056	SPINT1	HNRNPDL	0.00174053	0.154427	1
ID_30056	SPINT1	QKI	0.0134067	0.124233	1
ID_30056	SPINT1	RBM5	0.0450419	-0.102819	-1
ID_30056	SPINT1	YBX1	0.018449	0.11894	1
ID_39505	SREBF1	RBM5	0.0277873	0.112314	1
ID_43667	SRSF2	PCBP2	0.0340647	-0.109147	-1
ID_43667	SRSF2	PTBP2	0.000238849	-0.180592	-1
ID_43667	SRSF2	QKI	0.00569722	-0.139204	-1
ID_13486	STK32C	FMR1	0.000562059	-0.168053	-1
ID_13486	STK32C	HNRNPDL	0.000260334	0.177258	1
ID_13486	STK32C	PCBP2	0.00883385	-0.130925	-1
ID_13486	STK32C	QKI	0.000563368	-0.168016	-1
ID_13486	STK32C	RBM5	0.000265509	0.176955	1
ID_13486	STK32C	YBX1	0.000730563	-0.164875	-1
ID_50589	STRN4	FMR1	0.00015579	0.188608	1
ID_50589	STRN4	PCBP2	0.00488245	0.143928	1
ID_50589	STRN4	PTBP2	0.00010198	0.19347	1
ID_50589	STRN4	QKI	0.00710531	0.138147	1
ID_50589	STRN4	YBX1	0.0180877	0.122417	1
ID_42571	STXBP4	FMR1	0.000144568	-0.18308	-1
ID_42570	STXBP4	FMR1	0.000144568	0.18308	1
ID_42571	STXBP4	HNRNPDL	0.00370479	-0.14285	-1
ID_42570	STXBP4	HNRNPDL	0.00370479	0.14285	1
ID_42570	STXBP4	HNRNPF	0.01333	-0.123246	-1
ID_42571	STXBP4	HNRNPF	0.01333	0.123246	1
ID_42571	STXBP4	QKI	0.00375935	-0.142617	-1
ID_42570	STXBP4	QKI	0.00375935	0.142617	1
ID_42571	STXBP4	SRSF4	0.0133058	-0.123292	-1
ID_42570	STXBP4	SRSF4	0.0133058	0.123292	1
ID_42571	STXBP4	YBX1	0.00269091	-0.147208	-1
ID_42570	STXBP4	YBX1	0.00269091	0.147208	1
ID_27042	STXBP6	HNRNPDL	0.00163875	0.168289	1
ID_27042	STXBP6	PCBP2	0.0037434	0.156128	1
ID_27042	STXBP6	PTBP2	0.0121668	0.13667	1
ID_27042	STXBP6	QKI	0.0166106	0.130936	1
ID_94132	SULT1A3	PCBP2	0.000304557	0.174581	1
ID_94132	SULT1A3	RBM5	0.000402523	-0.171365	-1
ID_94113	SULT1A4	FMR1	0.00107981	-0.179661	-1
ID_94114	SULT1A4	FMR1	0.000469878	0.191008	1
ID_94113	SULT1A4	HNRNPDL	0.0116589	0.141748	1
ID_94114	SULT1A4	PCBP2	0.0113482	0.142362	1
ID_94113	SULT1A4	PTBP2	0.000432299	-0.192095	-1
ID_25661	SUPT20H	YBX1	0.000622253	0.16583	1
ID_78073	TAB2	PCBP2	0.000712124	0.191254	1
ID_78073	TAB2	PTBP2	0.0116589	0.146305	1
ID_78073	TAB2	RBM5	0.0433986	0.119662	1
ID_78073	TAB2	SRSF4	0.0123331	0.145114	1
ID_40518	TADA2A	FMR1	0.000797537	-0.162888	-1
ID_40520	TADA2A	FMR1	0.000797537	0.162896	1
ID_62719	TBC1D22A	FMR1	0.00533821	-0.14346	-1
ID_62719	TBC1D22A	HNRNPA1	0.0114807	0.131199	1
ID_62719	TBC1D22A	HNRNPDL	0.000193543	-0.187234	-1
ID_62719	TBC1D22A	RBM5	0.0464444	-0.105622	-1
ID_62719	TBC1D22A	SRSF4	0.0477405	-0.10504	-1
ID_65817	TBC1D23	HNRNPDL	0.0356398	0.122834	1
ID_65817	TBC1D23	PCBP2	0.000512196	0.194173	1
ID_24458	TCTN1	HNRNPDL	0.0116589	-0.125474	-1
ID_24461	TCTN1	HNRNPDL	0.0116589	0.125474	1
ID_24458	TCTN1	HNRNPF	0.0025202	-0.147935	-1
ID_24461	TCTN1	HNRNPF	0.0025202	0.147935	1
ID_24458	TCTN1	PTBP2	0.00954026	-0.128748	-1
ID_24461	TCTN1	PTBP2	0.00954026	0.128748	1
ID_24461	TCTN1	RBM5	0.00195838	-0.151349	-1
ID_24458	TCTN1	RBM5	0.00195838	0.151349	1
ID_75290	TFAP2A	HNRNPA1	0.00125354	-0.167806	-1
ID_75289	TFAP2A	HNRNPF	0.0498926	0.106596	1
ID_75289	TFAP2A	PCBP2	0.00287664	-0.155936	-1
ID_75290	TFAP2A	PTBP2	0.00786823	0.140718	1
ID_75289	TFAP2A	QKI	0.000477414	0.180394	1
ID_75289	TFAP2A	YBX1	0.0012229	-0.168125	-1
ID_89056	TFE3	PCBP2	0.00955122	0.137089	1
ID_89056	TFE3	YBX1	0.0286292	0.117474	1
ID_46727	TJP3	HNRNPF	0.00611814	-0.142852	-1
ID_46725	TJP3	HNRNPF	0.00620058	0.142616	1
ID_46727	TJP3	RBM5	0.00718716	-0.140305	-1
ID_46725	TJP3	RBM5	0.0161631	0.126486	1
ID_32771	TM2D3	FMR1	0.030051	0.113873	1
ID_32771	TM2D3	HNRNPDL	0.00125785	0.163549	1
ID_32771	TM2D3	PCBP2	0.000106029	0.193731	1
ID_32771	TM2D3	PTBP2	0.015074	0.126117	1
ID_32771	TM2D3	YBX1	0.0362597	0.110256	1
ID_39107	TMEM107	FMR1	0.000180999	0.188213	1
ID_39129	TMEM107	FMR1	0.000120326	0.202338	1
ID_39107	TMEM107	HNRNPA1	0.033455	-0.112196	-1
ID_39129	TMEM107	HNRNPF	0.00133263	-0.171202	-1
ID_39107	TMEM107	PCBP2	0.000798991	0.169957	1
ID_39107	TMEM107	SRSF4	0.00144122	0.162147	1
ID_47659	TMEM205	HNRNPDL	0.00285622	0.146493	1
ID_47659	TMEM205	HNRNPF	0.0445397	-0.102275	-1
ID_47659	TMEM205	PCBP2	0.000307657	-0.174619	-1
ID_47659	TMEM205	PTBP2	0.000169499	0.181456	1
ID_1571	TMEM234	FMR1	0.00375178	0.142527	1
ID_1571	TMEM234	PCBP2	0.0127351	0.123903	1
ID_38937	TMEM256-PLSCR3	PCBP2	0.00157609	-0.156485	-1
ID_29435	TNFAIP2	HNRNPDL	0.00805986	-0.131732	-1
ID_29435	TNFAIP2	PTBP2	0.0474491	-0.101062	-1
ID_29435	TNFAIP2	YBX1	0.0122815	0.124795	1
ID_42534	TOM1L1	HNRNPA1	0.032034	0.108227	1
ID_42534	TOM1L1	RBM5	0.0348528	-0.106742	-1
ID_48124	TPM4	HNRNPA1	0.00646461	-0.134884	-1
ID_48125	TPM4	HNRNPA1	0.00646461	0.134884	1
ID_48125	TPM4	PTBP2	0.00368561	-0.142947	-1
ID_48124	TPM4	PTBP2	0.00368561	0.142947	1
ID_48125	TPM4	QKI	0.014584	-0.121815	-1
ID_48124	TPM4	QKI	0.014584	0.121815	1
ID_53980	TPRKB	HNRNPDL	0.00248625	-0.148151	-1
ID_53980	TPRKB	HNRNPF	0.00948267	-0.128872	-1
ID_53980	TPRKB	SRSF4	0.00597652	-0.135966	-1
ID_42725	TRIM37	PTBP2	0.00734672	-0.134535	-1
ID_42725	TRIM37	RBM5	0.0276325	0.11231	1
ID_1923	TRIT1	FMR1	0.00560875	-0.149247	-1
ID_1923	TRIT1	PTBP2	0.000789014	-0.177659	-1
ID_1923	TRIT1	QKI	0.00123215	-0.171596	-1
ID_1923	TRIT1	SRSF4	0.0271368	-0.121302	-1
ID_68771	TRMT44	PCBP2	0.0393376	-0.104414	-1
ID_68770	TRMT44	PCBP2	0.0393376	0.104414	1
ID_68771	TRMT44	PTBP2	0.00150631	-0.154816	-1
ID_68770	TRMT44	PTBP2	0.00150631	0.154816	1
ID_68771	TRMT44	QKI	0.00164416	-0.153647	-1
ID_68770	TRMT44	QKI	0.00164416	0.153647	1
ID_68771	TRMT44	YBX1	0.012142	-0.124814	-1
ID_68770	TRMT44	YBX1	0.012142	0.124814	1
ID_89255	TRO	FMR1	0.000192691	-0.181406	-1
ID_89255	TRO	QKI	0.0153972	-0.121976	-1
ID_89255	TRO	RBM5	0.00957054	0.129913	1
ID_20954	TSPAN11	FMR1	0.00092426	-0.161731	-1
ID_20953	TSPAN11	FMR1	0.00092426	0.161731	1
ID_20954	TSPAN11	HNRNPDL	0.00224878	-0.15004	-1
ID_20953	TSPAN11	HNRNPDL	0.00224878	0.15004	1
ID_20954	TSPAN11	PCBP2	0.000233328	-0.178297	-1
ID_20953	TSPAN11	PCBP2	0.000233328	0.178297	1
ID_20954	TSPAN11	PTBP2	0.00250079	-0.148616	-1
ID_20953	TSPAN11	PTBP2	0.00250079	0.148616	1
ID_22732	TSPAN31	QKI	0.0431153	-0.104376	-1
ID_52552	TSSC1	PTBP2	0.00597002	-0.137186	-1
ID_49268	U2AF1L4	PTBP2	0.0352244	-0.10861	-1
ID_63714	UBE2E1	PTBP2	0.000262171	-0.187329	-1
ID_63715	UBE2E1	PTBP2	0.000262171	0.187329	1
ID_63714	UBE2E1	QKI	0.0381696	-0.111711	-1
ID_63715	UBE2E1	QKI	0.0381696	0.111711	1
ID_63714	UBE2E1	SRSF4	0.00470365	-0.148401	-1
ID_63715	UBE2E1	SRSF4	0.00470365	0.148401	1
ID_63714	UBE2E1	YBX1	0.00916726	-0.137814	-1
ID_63715	UBE2E1	YBX1	0.00916726	0.137814	1
ID_1254	UBXN11	FMR1	0.00393438	-0.146135	-1
ID_1256	UBXN11	FMR1	0.0158739	-0.127214	-1
ID_1254	UBXN11	HNRNPF	0.00161185	0.15854	1
ID_1254	UBXN11	PCBP2	0.00656999	-0.138534	-1
ID_1254	UBXN11	PTBP2	0.00183406	-0.156815	-1
ID_1256	UBXN11	PTBP2	0.022329	-0.121259	-1
ID_1254	UBXN11	RBM5	0.000625054	0.170712	1
ID_1256	UBXN11	RBM5	0.000264619	0.185967	1
ID_11105	WAC	QKI	0.0399063	-0.105223	-1
ID_11105	WAC	RBM5	0.00115588	0.159976	1
ID_11105	WAC	YBX1	0.00449512	-0.141637	-1
ID_89084	WDR45	HNRNPF	0.00247517	-0.169202	-1
ID_89084	WDR45	PTBP2	0.00108497	0.181582	1
ID_3330	WDR78	FMR1	0.00383168	-0.146344	-1
ID_3330	WDR78	HNRNPDL	0.0270433	-0.114536	-1
ID_3330	WDR78	PTBP2	0.000936588	-0.165593	-1
ID_3330	WDR78	RBM5	0.0393442	0.107412	1
ID_3330	WDR78	YBX1	0.00206172	-0.154961	-1
ID_13040	WDR96	FMR1	0.0130283	-0.132717	-1
ID_13039	WDR96	FMR1	0.00339177	0.154643	1
ID_13039	WDR96	HNRNPDL	0.0199979	-0.125231	-1
ID_13039	WDR96	HNRNPF	0.0155924	0.129611	1
ID_13040	WDR96	PCBP2	0.00737819	-0.142665	-1
ID_13039	WDR96	PTBP2	0.0356194	-0.114267	-1
ID_59582	WFDC2	FMR1	0.0019944	-0.163765	-1
ID_59582	WFDC2	PCBP2	0.031778	-0.117534	-1
ID_59582	WFDC2	SRSF4	0.0423546	0.11178	1
ID_61232	YDJC	FMR1	0.00216538	-0.152329	-1
ID_61232	YDJC	HNRNPA1	0.0214103	-0.117193	-1
ID_61232	YDJC	PCBP2	0.00131219	-0.159024	-1
ID_61232	YDJC	SRSF4	0.00162556	-0.156211	-1
ID_61232	YDJC	YBX1	0.000771722	-0.165835	-1
ID_71450	ZDHHC11	PCBP2	0.000728016	0.186208	1
ID_11368	ZFAND4	FMR1	0.0161631	0.120953	1
ID_11368	ZFAND4	HNRNPDL	0.0126124	0.125079	1
ID_11368	ZFAND4	HNRNPF	0.0450221	-0.102635	-1
ID_11368	ZFAND4	PTBP2	0.00127152	0.15824	1
ID_48677	ZNF101	HNRNPDL	0.000259074	-0.178524	-1
ID_48677	ZNF101	PTBP2	0.00782059	-0.133589	-1
ID_48677	ZNF101	RBM5	0.0498926	-0.101112	-1
ID_86927	ZNF169	FMR1	0.000407088	-0.171727	-1
ID_86927	ZNF169	HNRNPF	0.0206457	0.116474	1
ID_50248	ZNF283	FMR1	0.00667263	-0.134638	-1
ID_50248	ZNF283	HNRNPDL	0.00572857	-0.136942	-1
ID_50248	ZNF283	PTBP2	0.00572722	-0.136956	-1
ID_19923	ZNF384	PTBP2	0.00226036	-0.15126	-1
ID_19923	ZNF384	QKI	0.00175661	-0.154751	-1
ID_52338	ZNF586	FMR1	0.00743574	0.132664	1
ID_52338	ZNF586	HNRNPA1	0.000487724	-0.16883	-1
ID_52338	ZNF586	HNRNPF	0.00954026	-0.128753	-1
ID_52338	ZNF586	PTBP2	0.000237994	0.177355	1
ID_52338	ZNF586	QKI	0.0105604	0.127089	1
ID_52338	ZNF586	RBM5	0.0116589	0.12551	1
ID_52336	ZNF586	SRSF4	0.0410067	0.10365	1
ID_47400	ZNF846	FMR1	0.01116	0.135412	1
ID_47400	ZNF846	HNRNPDL	0.0120379	0.133973	1
ID_47400	ZNF846	YBX1	0.00487505	0.148929	1
ID_39398	ZSWIM7	FMR1	0.00234865	0.152578	1
ID_39398	ZSWIM7	HNRNPDL	0.000263474	0.18042	1
ID_39398	ZSWIM7	HNRNPF	0.0146915	-0.124603	-1
ID_39398	ZSWIM7	RBM5	0.00181049	0.156205	1
